# Supplementary material for: Detecting early signs of heat and drought stress in Phoenix dactylifera (date palm)
Source: PubMed Central journal article supplement (PMC5453443; doi:10.1371/journal.pone.0177883), 2017-06-01

# Treemap of significantly upregulated Gene Ontology terms in combined heat and drought

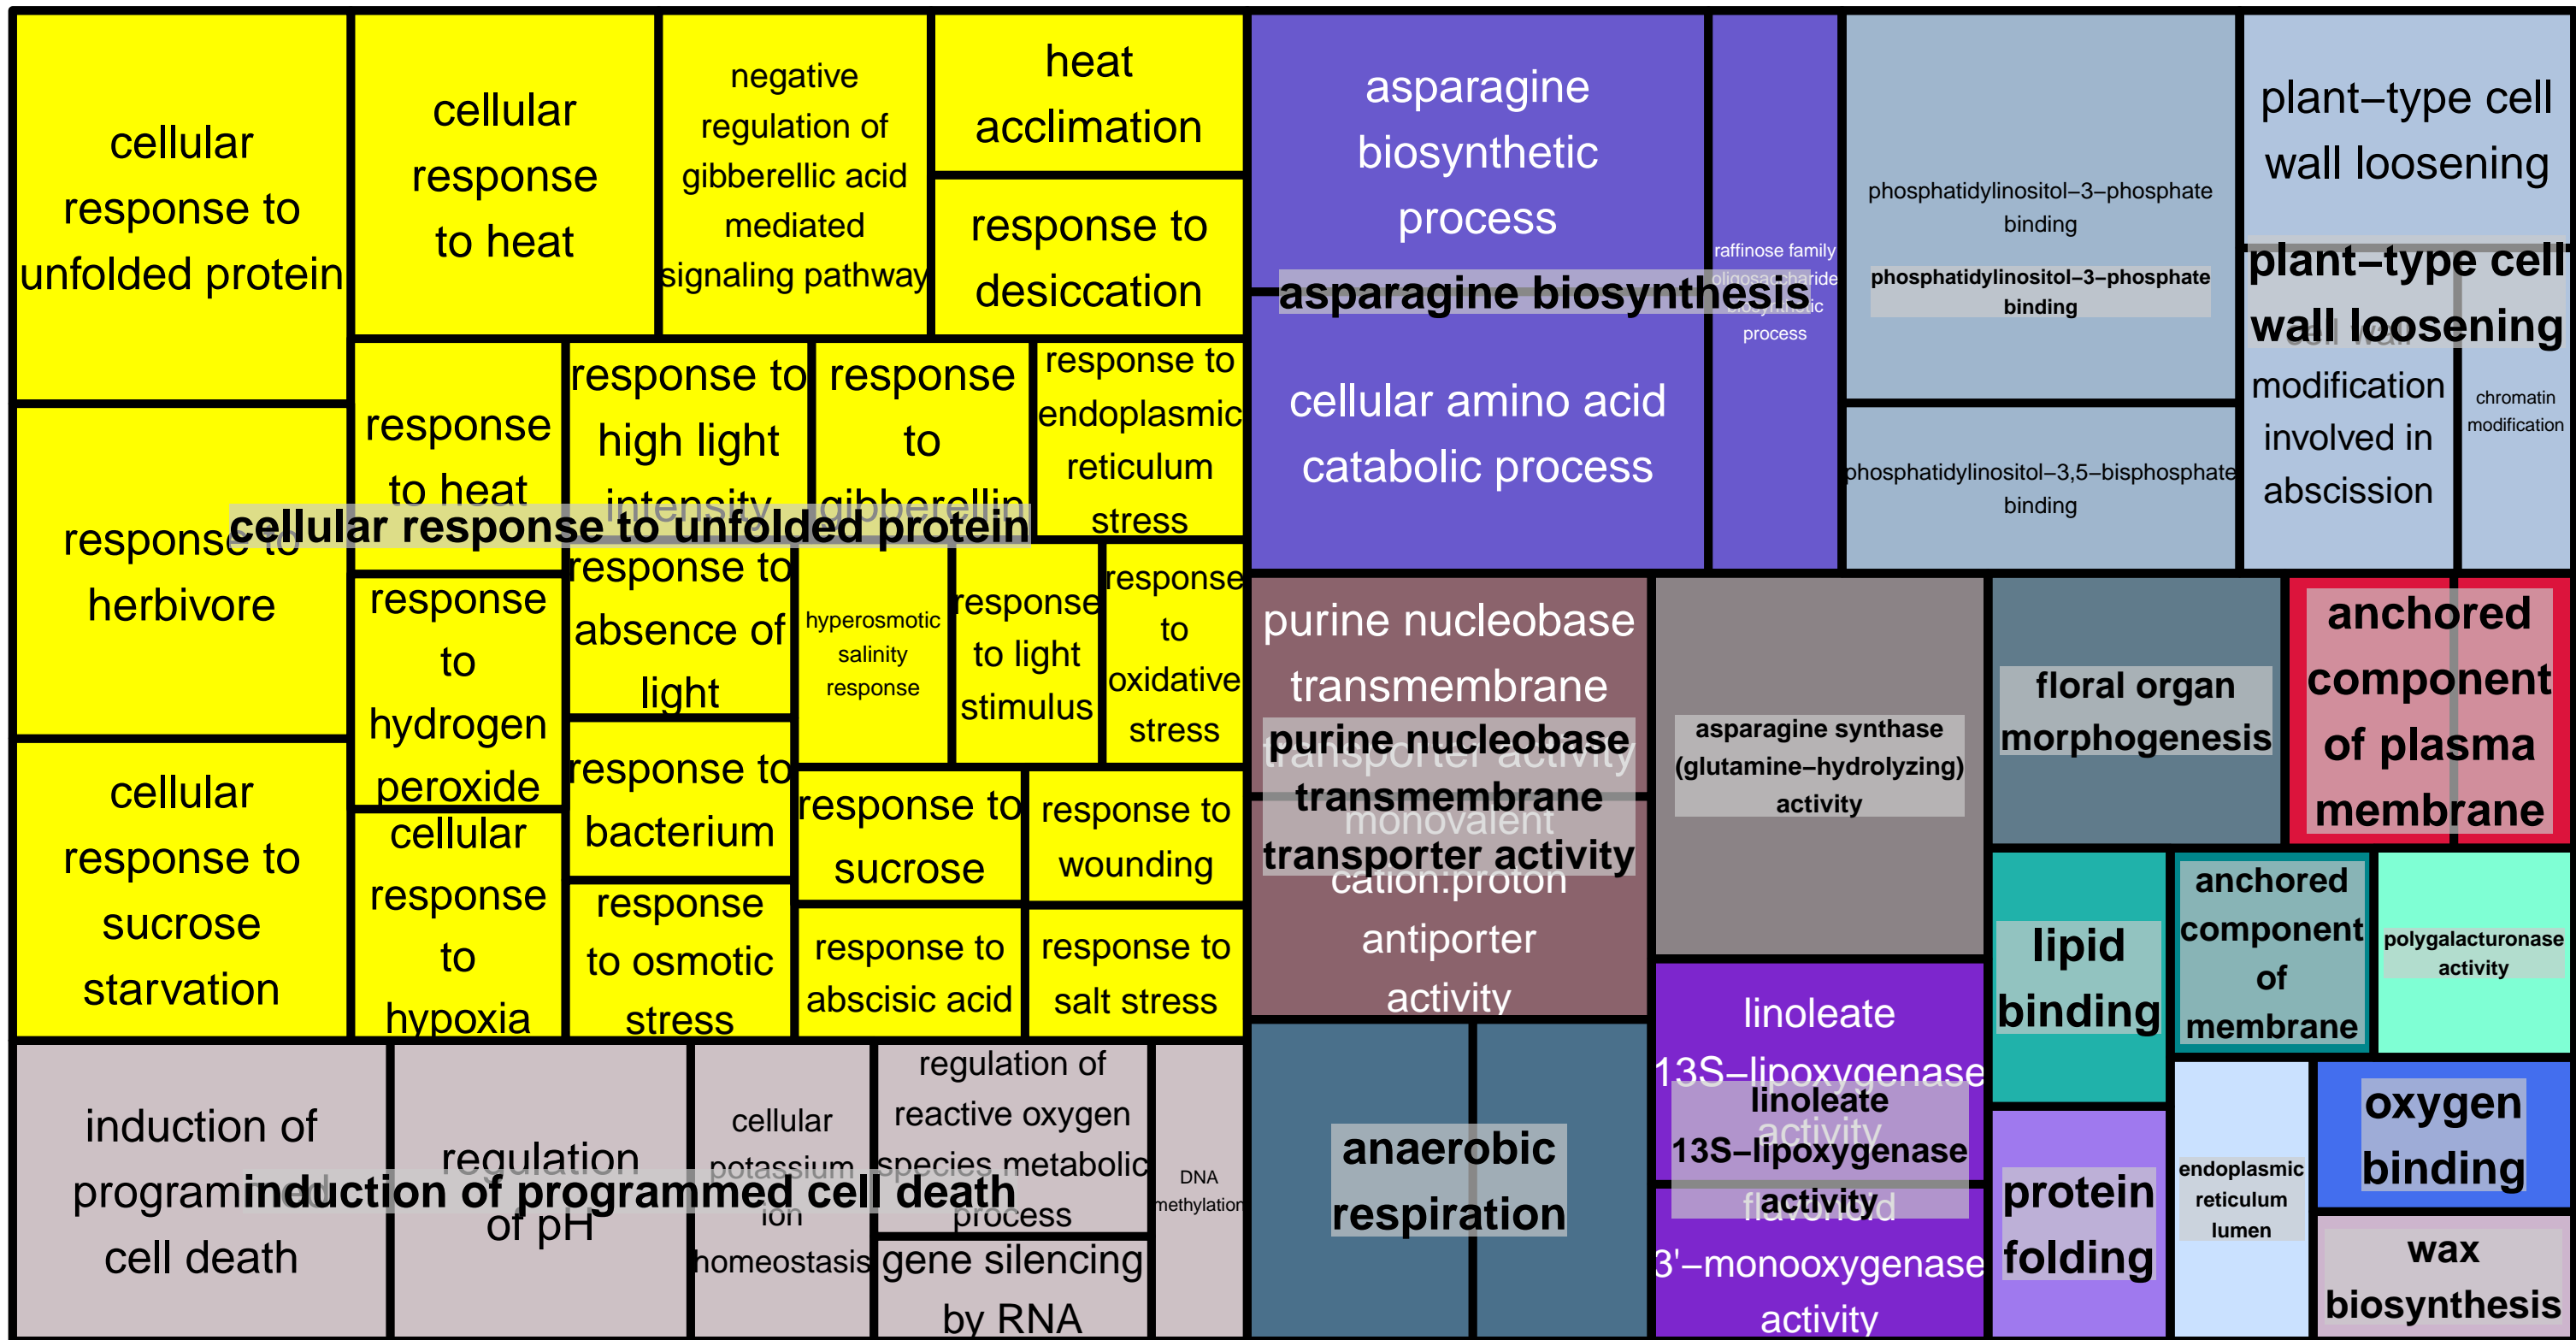

Supplement: pone.0177883.s013.pdf [file pone.0177883.s013.pdf]
