# Supplementary material for: Detecting early signs of heat and drought stress in Phoenix dactylifera (date palm)
Source: PLoS One. 2017 Jun 1;12(6):e0177883. doi: 10.1371/journal.pone.0177883 (PMC5453443; doi:10.1371/journal.pone.0177883)
Supplement: S5 Table — (XLSX) [file pone.0177883.s005.xlsx]

## Sheet: Sheet2
Supplementary Table 5. Differential expression analysis of all P.dactylifera genes, assembly DPV01. The genes with significantly higher or lower expression in drought (D), heat (H), or combined heat and drought (HD) are highlighted with red and blue, respectively. Threshold for significance was abs(log2FC)>1 and FDR<0.05.
		Log2FC			p-values			Adjusted p-values (FDR)
Gene ID	Annotation	D	H	HD	PValue_D	PValue_H	PValue_HD	FDR_D	FDR_H	FDR_HD
PDACT_KE333412.1_G000270	Bax inhibitor-1 family protein LENGTH=247	5.75787	3.02507	4.6085	4.83496e-09	0.000464929	7.40763e-07	0.000118476	0.0155366	4.727e-05
PDACT_KE334843.1_G000160	FZO-like protein n=2 Tax=Arabidopsis thaliana RepID=Q67Z21 ARATH	4.43063	5.39261	5.42004	1.32156e-08	3.92584e-11	3.36573e-11	0.000161918	8.01657e-08	1.49952e-08
PDACT_KE332689.1_G001050	Mitochondrial substrate carrier family protein LENGTH=348	2.05305	1.72662	2.52713	1.02448e-07	6.17743e-06	1.16548e-10	0.000358625	0.000776265	4.39369e-08
PDACT_KE332660.1_G000280	unknown protein; FUNCTIONS IN: molecular function unknown; INVOLVED IN: biological process unknown; LOCATED IN: mitochondrion; BEST Arabidopsis thaliana protein match is: unknown protein . LENGTH=247	4.27725	1.44233	3.82358	9.39702e-08	0.043493	1.0883e-06	0.000358625	0.239074	6.55228e-05
PDACT_KE332815.1_G000720	unknown protein; FUNCTIONS IN: molecular function unknown; INVOLVED IN: response to oxidative stress, anaerobic respiration; LOCATED IN: cellular component unknown; EXPRESSED IN: 23 plant structures; EXPRESSED DURING: 13 growth stages; Has 47 Blast hits to 47 proteins in 12 species: Archae - 0; Bacteria - 0; Metazoa - 1; Fungi - 0; Plants - 46; Viruses - 0; Other Eukaryotes - 0 (source: NCBI BLin…	6.32482	1.92387	4.13536	7.66941e-08	0.0461457	9.59979e-05	0.000358625	0.246298	0.00203489
PDACT_KE332561.1_G001060	heat shock protein 21 LENGTH=227	8.54153	1.96426	4.78911	6.8421e-08	0.0762795	0.000262723	0.000358625	0.320335	0.00435868
PDACT_KE332622.1_G000550	heat shock protein 21 LENGTH=227	7.54127	1.27464	3.92753	7.94676e-08	0.228629	0.000898875	0.000358625	0.553207	0.0106974
PDACT_KE332562.1_G003780	Heat stress transcription factor A-2	6.12516	3.93029	5.70488	1.37526e-07	0.00016808	5.53979e-07	0.000421243	0.00796643	3.87848e-05
PDACT_KE334909.1_G000140	Peptidyl-prolyl cis-trans isomerase	4.59108	4.31458	5.02336	2.29308e-07	8.32901e-07	2.947e-08	0.000468247	0.000169147	3.74162e-06
PDACT_KE335554.1_G000100	Peptidyl-prolyl cis-trans isomerase	4.59108	4.31458	5.02336	2.29265e-07	8.32757e-07	2.94636e-08	0.000468247	0.000169147	3.74162e-06
PDACT_KE332973.1_G000100	18.2 kDa class I heat shock protein	4.45771	3.25376	4.20116	2.17968e-07	6.28012e-05	7.60644e-07	0.000468247	0.00404969	4.82871e-05
PDACT_KE332752.1_G001250	galactinol synthase 1 LENGTH=344	7.09998	3.12492	4.52168	1.86388e-07	0.00562932	0.000176945	0.000468247	0.0740005	0.0032189
PDACT_KE333161.1_G000470	18.1 kDa class I heat shock protein	7.85263	4.32306	5.54927	4.36031e-07	0.000977552	6.96282e-05	0.000748919	0.0250553	0.00160354
PDACT_KE333362.1_G000270	Heat shock 70 kDa protein 14	6.03181	3.44646	3.82768	4.38903e-07	0.00104351	0.000353227	0.000748919	0.0261455	0.00539955
PDACT_KE332677.1_G000930	Chaperone protein htpG family protein LENGTH=823	4.77556	2.75557	4.4219	4.58447e-07	0.00140626	2.04089e-06	0.000748919	0.0320823	0.000105506
PDACT_KE332561.1_G004870	17.8 kDa class I heat shock protein	6.61671	2.71292	4.25957	4.9141e-07	0.0131232	0.000289453	0.000752594	0.122362	0.00466805
PDACT_KE332560.1_G001010	22.7 kDa class IV heat shock protein	5.9478	4.11017	5.53451	5.2662e-07	0.000152461	1.93153e-06	0.000759077	0.00745688	0.000101698
PDACT_KE332973.1_G000120	17.8 kDa class I heat shock protein	5.26441	3.54747	5.22908	6.00161e-07	0.000262624	6.83252e-07	0.000817019	0.0107083	4.46464e-05
PDACT_KE332799.1_G000240	Inositol-3-phosphate synthase	3.90473	1.91013	2.51117	7.47297e-07	0.00852839	0.000716727	0.000963777	0.095294	0.00905292
PDACT_KE333943.1_G000180	heat shock protein 21 LENGTH=227	5.97621	3.64513	4.53979	8.46882e-07	0.000783824	6.13396e-05	0.0010376	0.0219006	0.00144804
PDACT_KE332631.1_G002080	17.6 kDa class II heat shock protein LENGTH=155	4.95129	4.22596	5.07676	1.09044e-06	1.64899e-05	6.76199e-07	0.00127239	0.00155411	4.43037e-05
PDACT_KE333475.1_G000330	GDSL esterase/lipase	-5.12799	-1.36664	-0.366395	1.33125e-06	0.134095	0.683264	0.00148277	0.427554	0.833473
PDACT_KE332651.1_G000770	BAG family molecular chaperone regulator 6	5.87913	4.26821	5.08352	1.70096e-06	0.000174719	1.72157e-05	0.00181218	0.00823328	0.000548573
PDACT_KE332560.1_G000990	22.0 kDa class IV heat shock protein	4.53662	1.58229	3.70272	4.1271e-06	0.0690885	9.22974e-05	0.00421376	0.305398	0.00196666
PDACT_KE332721.1_G000120	unknown protein; FUNCTIONS IN: molecular function unknown; INVOLVED IN: biological process unknown; LOCATED IN: mitochondrion; BEST Arabidopsis thaliana protein match is: unknown protein . LENGTH=165	2.90988	2.13506	4.29705	4.43909e-06	0.000518702	1.97361e-10	0.00435102	0.0168379	6.71686e-08
PDACT_KE333135.1_G000320	Heat shock 70 kDa protein 3	5.35021	3.69668	5.61151	5.60829e-06	0.00067822	2.56378e-06	0.00528559	0.0200857	0.00012615
PDACT_KE332691.1_G000330	Chaperone protein DnaJ	3.07073	2.77551	2.85116	6.36297e-06	3.59233e-05	2.34153e-05	0.00556851	0.00269194	0.000692121
PDACT_KE332592.1_G001740	Catalase-peroxidase	3.99856	1.16402	1.54907	6.26026e-06	0.142371	0.0533753	0.00556851	0.440155	0.18272
PDACT_KE333301.1_G000480	Phosphosulfolactate synthase	2.93011	1.47979	2.48669	6.93526e-06	0.0168067	0.000102409	0.00566472	0.140128	0.00213388
PDACT_KE332643.1_G001140	Heat shock 70 kDa protein	8.6196	0.520864	4.64426	6.71617e-06	0.650233	0.00280803	0.00566472	0.861194	0.0247504
PDACT_KE332821.1_G001110	Chaperone protein ClpB	3.28495	3.04843	4.16269	7.27865e-06	2.59585e-05	4.80825e-08	0.00575342	0.00217095	5.37997e-06
PDACT_KE333082.1_G000440	UDP-Glycosyltransferase superfamily protein LENGTH=489	-4.74987	-0.689288	-1.57859	8.33966e-06	0.457566	0.095021	0.00638609	0.746025	0.26408
PDACT_KE335778.1_G000120	DWNN domain, a CCHC-type zinc finger LENGTH=827	-2.60982	-0.403917	-0.653432	8.73608e-06	0.46542	0.239054	0.00648693	0.751294	0.468922
PDACT_KE332772.1_G000780	ATP-dependent zinc metalloprotease FtsH	3.55831	4.21784	6.74177	1.30127e-05	5.41621e-07	1.17149e-12	0.00937836	0.000124036	7.55426e-10
PDACT_KE332548.1_G003200	Chaperone protein DnaJ	2.5773	1.43598	2.0821	1.5878e-05	0.0124903	0.0003836	0.0111164	0.119143	0.00573155
PDACT_KE332557.1_G004310	Rhodanese-like domain-containing protein 17	4.26786	3.50486	6.11234	1.97172e-05	0.000277975	2.21662e-08	0.0132418	0.0110937	3.03441e-06
PDACT_KE332549.1_G002790	Chaperone protein ClpB 2	1.9114	1.12579	1.55099	1.99945e-05	0.010287	0.000468129	0.0132418	0.106539	0.00661613
PDACT_KE332646.1_G000700	unknown protein; Has 19 Blast hits to 19 proteins in 8 species: Archae - 0; Bacteria - 0; Metazoa - 0; Fungi - 0; Plants - 19; Viruses - 0; Other Eukaryotes - 0 (source: NCBI BLink). LENGTH=199	3.42533	1.65239	2.97131	2.11445e-05	0.0278202	0.000167605	0.0136349	0.187643	0.00308235
PDACT_KE332817.1_G000750	Brown planthopper-induced resistance protein 1 n=1 Tax=Oryza sativa subsp. indica RepID=Q6V9H6 ORYSI	2.14214	3.0472	4.78184	2.78236e-05	8.52535e-09	7.12742e-17	0.0174818	5.35654e-06	1.7465e-13
PDACT_KE332549.1_G005830	ATP synthase subunit 9, mitochondrial	7.9625	8.98867	5.7947	2.97852e-05	6.51339e-06	0.0007458	0.0182464	0.000806082	0.00932901
PDACT_KE332689.1_G001350	unknown protein; Has 1807 Blast hits to 1807 proteins in 277 species: Archae - 0; Bacteria - 0; Metazoa - 736; Fungi - 347; Plants - 385; Viruses - 0; Other Eukaryotes - 339 (source: NCBI BLink). LENGTH=225	2.42554	1.02045	1.78335	3.40159e-05	0.0691835	0.00183914	0.0203299	0.305528	0.0181792
PDACT_KE332562.1_G003770	Heat stress transcription factor A-2	6.08967	4.11055	5.90452	3.62807e-05	0.00169063	5.21413e-05	0.0211369	0.0362442	0.00128501
PDACT_KE335258.1_G000130	17.7 kDa class I heat shock protein	3.08491	2.20252	2.93839	3.70914e-05	0.00227473	7.6871e-05	0.0211369	0.0432093	0.00171396
PDACT_KE333125.1_G000350	heat shock protein 21 LENGTH=227	6.97511	2.69602	4.52492	4.03127e-05	0.0529498	0.00280389	0.0224505	0.265617	0.0247412
PDACT_KE332753.1_G000640	Chaperone protein htpG family protein LENGTH=780	3.98468	5.69365	6.01945	4.21416e-05	6.97046e-08	1.98373e-08	0.0229475	3.05007e-05	2.82613e-06
PDACT_KE332985.1_G000120	Cellulase (glycosyl hydrolase family 5) protein LENGTH=551	6.37683	5.76088	5.48909	4.46563e-05	0.000121187	0.000189269	0.0237882	0.0063452	0.00339521
PDACT_KE332803.1_G000500	17.6 kDa class II heat shock protein LENGTH=155	2.87808	2.46239	2.96613	5.41994e-05	0.000443523	3.40234e-05	0.0282575	0.0150757	0.000921226
PDACT_KE333051.1_G000440	Chaperone protein ClpB	2.47886	1.86689	2.84462	5.84143e-05	0.00197516	5.49464e-06	0.0292119	0.0396716	0.000224028
PDACT_KE332561.1_G004900	18.1 kDa class I heat shock protein	4.46189	2.62643	3.71747	5.77037e-05	0.0099573	0.000515238	0.0292119	0.10484	0.00715962
PDACT_KE333098.1_G000290	alpha-amylase-like LENGTH=423	-6.60865	-0.101695	-1.24687	6.47723e-05	0.941861	0.377443	0.0317436	0.982393	0.608509
PDACT_KE334809.1_G000180	UPI0003D715A2 related cluster n=1 Tax=unknown RepID=UPI0003D715A2	-1.91384	-2.42951	-2.61021	7.90794e-05	8.74898e-07	1.59151e-07	0.034284	0.000171508	1.43905e-05
PDACT_KE332575.1_G002350	17.7 kDa class I heat shock protein	2.69618	3.22147	3.89589	7.94778e-05	4.01549e-06	6.42994e-08	0.034284	0.000565491	6.85645e-06
PDACT_KE333251.1_G000250	growth-regulating factor 3 LENGTH=398	-3.57853	-4.24981	-4.58017	7.73198e-05	5.36032e-06	1.38809e-06	0.034284	0.000698666	7.9286e-05
PDACT_KE332749.1_G000990	Ribulose bisphosphate carboxylase/oxygenase activase	3.18548	3.64008	4.35141	7.34695e-05	9.06471e-06	2.88274e-07	0.034284	0.00101425	2.26406e-05
PDACT_KE332963.1_G000400	17.6 kDa class II heat shock protein LENGTH=155	2.85098	1.00799	0.974995	7.97497e-05	0.138759	0.152063	0.034284	0.434358	0.356927
PDACT_KE332595.1_G002770	Pathogenesis-related thaumatin superfamily protein LENGTH=330	-5.79933	-1.30465	-4.69861	7.54758e-05	0.339323	0.00168295	0.034284	0.660952	0.0170269
PDACT_KE332555.1_G005480	Histone superfamily protein LENGTH=164	2.15085	-0.281445	-0.468842	7.53329e-05	0.589772	0.370105	0.034284	0.827654	0.602114
PDACT_KE332630.1_G000440	Calcyclin-binding protein	2.14015	1.1324	1.43472	8.20031e-05	0.0319305	0.00696843	0.0346449	0.201154	0.0465429
PDACT_KE334819.1_G000130	unknown protein; FUNCTIONS IN: molecular function unknown; INVOLVED IN: biological process unknown; LOCATED IN: endomembrane system; BEST Arabidopsis thaliana protein match is: unknown protein . LENGTH=300	-1.43583	-1.94515	-1.77332	8.69834e-05	1.69968e-07	1.73273e-06	0.035524	5.40896e-05	9.43527e-05
PDACT_KE332545.1_G004560	BAG family molecular chaperone regulator 6	3.57786	0.952713	2.21892	8.69049e-05	0.248999	0.00985928	0.035524	0.576087	0.0590689
PDACT_KE332988.1_G000360	cold-regulated 413-plasma membrane 2 LENGTH=203	1.82265	1.34708	2.32222	9.49895e-05	0.00347917	9.95348e-07	0.0381577	0.0561808	6.11278e-05
PDACT_KE332746.1_G000750	unknown protein; Has 1807 Blast hits to 1807 proteins in 277 species: Archae - 0; Bacteria - 0; Metazoa - 736; Fungi - 347; Plants - 385; Viruses - 0; Other Eukaryotes - 339 (source: NCBI BLink). LENGTH=225	2.26289	1.13119	1.62826	9.78189e-05	0.0440487	0.00421102	0.0386606	0.241032	0.0327889
PDACT_KE332963.1_G000430	17.6 kDa class II heat shock protein LENGTH=155	7.24877	-0.529163	0.497836	0.000102557	0.158997	0.584022	0.03989	0.465034	0.7683
PDACT_KE332552.1_G005670	CHY-type/CTCHY-type/RING-type Zinc finger protein LENGTH=328	1.57742	2.10889	2.50906	0.000105823	3.45022e-07	2.30917e-09	0.0405168	9.08388e-05	4.9635e-07
PDACT_KE332576.1_G004220	Peptidase M50 family protein LENGTH=548	2.11314	2.02095	3.0121	0.000112453	0.000210976	1.07953e-07	0.042393	0.00923171	1.04557e-05
PDACT_KE332548.1_G004870	Glutathione S-transferase family protein LENGTH=235	2.21524	1.8355	1.65856	0.000114965	0.00120868	0.0032856	0.0426835	0.0291797	0.0276859
PDACT_KE332580.1_G003580	alcohol dehydrogenase 1 LENGTH=379	3.22733	3.45136	3.14797	0.000138203	5.48349e-05	0.000193418	0.049802	0.00367124	0.00344943
PDACT_KE332626.1_G000100	Zinc finger protein ZPR1	2.20351	0.782354	1.46165	0.00013802	0.159929	0.00964771	0.049802	0.466187	0.0581712
PDACT_KE333251.1_G000240	Transcription factor jumonji (jmjC) domain-containing protein LENGTH=875	-2.89583	-4.35781	-4.4992	0.000164297	1.13167e-07	5.37606e-08	0.0575135	4.20158e-05	5.88103e-06
PDACT_KE332985.1_G000180	SET domain-containing protein LENGTH=463	-1.42603	-0.0563538	-0.449023	0.00016286	0.878628	0.225264	0.0575135	0.962187	0.452478
PDACT_KE332740.1_G000350	agenet domain-containing protein / bromo-adjacent homology (BAH) domain-containing protein LENGTH=648	1.35345	0.350137	0.0603291	0.000168247	0.323278	0.864898	0.0580665	0.645036	0.936637
PDACT_KE332986.1_G000520	Aquaporin-like superfamily protein LENGTH=285	1.63898	0.899115	1.52531	0.000173387	0.0360818	0.00045528	0.0590095	0.215488	0.00648427
PDACT_KE332881.1_G000480	Peroxiredoxin-6	-4.18386	-5.20522	-8.45006	0.000189193	9.3763e-06	2.91196e-10	0.0619391	0.0010303	9.29548e-08
PDACT_KE332611.1_G001800	Major pollen allergen Bet v 1-D/H	-4.58153	-3.03335	-0.187557	0.000186602	0.0100925	0.866504	0.0619391	0.105605	0.937431
PDACT_KE332632.1_G002170	Phosphoglycerate mutase, 2,3-bisphosphoglycerate-independent LENGTH=560	1.72927	1.12333	1.83854	0.000190296	0.0138202	7.68637e-05	0.0619391	0.126325	0.00171396
PDACT_KE332550.1_G004300	Chromatin assembly factor 1 subunit FAS1	-2.91308	1.11962	-1.0432	0.000192106	0.134066	0.162838	0.0619391	0.427554	0.37163
PDACT_KE332712.1_G001100	Heat stress transcription factor B-2c	2.48921	1.95391	2.385	0.00020519	0.00296085	0.000354835	0.0648759	0.050877	0.00542075
PDACT_KE333107.1_G000240	Very-long-chain (3R)-3-hydroxyacyl-[acyl-carrier protein] dehydratase	1.98952	0.200535	0.417032	0.00020651	0.698228	0.420742	0.0648759	0.885923	0.64728
PDACT_KE332546.1_G006690	Ran BP2/NZF zinc finger-like superfamily protein LENGTH=170	-2.90528	-0.772143	0.739865	0.00021044	0.292887	0.313515	0.0652736	0.61754	0.547911
PDACT_KE332751.1_G001210	Pre-mRNA-splicing factor 18	1.82491	2.51057	3.45924	0.000214933	6.35229e-07	4.13636e-11	0.0658339	0.000140231	1.71792e-08
PDACT_KE332916.1_G000440	Aspartate--tRNA ligase	3.34392	4.07033	4.41419	0.000223426	1.84451e-05	5.76807e-06	0.0675906	0.00170558	0.000232468
PDACT_KE333062.1_G000310	calcium-dependent protein kinase 32 LENGTH=538	7.17489	7.31627	7.17068	0.000228278	0.000201992	0.000229028	0.0682161	0.00891821	0.00394108
PDACT_KE333182.1_G000630	pleiotropic drug resistance 9 LENGTH=1450	-5.66062	-4.31043	-5.66062	0.000232664	0.0126922	0.00025582	0.0686891	0.120128	0.00428184
PDACT_KE332687.1_G001090	Disease resistance protein (CC-NBS-LRR class) family LENGTH=884	-5.86001	-3.1424	-3.34085	0.000235936	0.0731747	0.0584192	0.0688259	0.314795	0.194287
PDACT_KE332973.1_G000140	17.6 kDa class II heat shock protein LENGTH=155	4.32657	2.68858	4.75432	0.000250087	0.0137113	8.1805e-05	0.0720956	0.125835	0.0017978
PDACT_KE332545.1_G004940	Suppressor of G2 allele of SKP1 homolog	1.98391	1.525	2.16641	0.000254579	0.00435716	7.18907e-05	0.0725371	0.0638181	0.00163698
PDACT_KE332746.1_G000920	chaperone binding;ATPase activators LENGTH=196	1.62098	1.52396	2.22775	0.000258865	0.000571263	8.40103e-07	0.0729107	0.0177868	5.27843e-05
PDACT_KE333098.1_G000280	alpha-amylase-like 2 LENGTH=413	-6.71408	-0.42528	-1.15555	0.000264915	0.788734	0.470885	0.0737668	0.926272	0.687
PDACT_KE332727.1_G000240	Ubiquitin carboxyl-terminal hydrolase family protein LENGTH=449	-2.78816	2.58495	2.14879	0.000298551	0.000736966	0.0043547	0.0821987	0.0211212	0.0335949
PDACT_KE332611.1_G001720	Major pollen allergen Bet v 1-D/H	-3.51108	-1.80413	-0.739715	0.000333649	0.0499196	0.411997	0.0908415	0.256442	0.639891
PDACT_KE332554.1_G004410	Pathogenesis-related thaumatin superfamily protein LENGTH=249	5.1265	2.92777	2.6944	0.000347251	0.0138897	0.0202877	0.0924897	0.126431	0.0965183
PDACT_KE332782.1_G000370	Heat stress transcription factor B-2b	2.37394	1.54384	2.5763	0.000344078	0.0167096	0.00011579	0.0924897	0.139951	0.00235291
PDACT_KE332560.1_G001630	inositol polyphosphate kinase 2 beta LENGTH=300	2.26007	-1.54976	-0.0939378	0.000372201	0.0129619	0.877415	0.0980691	0.121464	0.942529
PDACT_KE332611.1_G000500	Protein of unknown function (DUF630 and DUF632) LENGTH=657	1.94557	1.45654	1.42453	0.000393624	0.00710467	0.00845789	0.10261	0.0852561	0.0531375
PDACT_KE332565.1_G003900	Aquaporin-like superfamily protein LENGTH=268	2.184	3.52908	5.53233	0.000429823	7.12759e-08	1.49795e-14	0.109712	3.06411e-05	1.83529e-11
PDACT_KE332802.1_G000490	Ribonuclease H-like superfamily protein LENGTH=484	-3.3374	-2.28508	-3.19269	0.000426726	0.011821	0.000713792	0.109712	0.115634	0.00902981
PDACT_KE332613.1_G001920	Zinc finger protein CONSTANS-LIKE 14	3.1151	2.01831	1.49176	0.000441468	0.0168014	0.071966	0.111523	0.140128	0.222501
PDACT_KE332566.1_G002720	Protein kinase superfamily protein LENGTH=371	-2.33857	1.93304	2.15098	0.000469597	0.00319085	0.00112985	0.11507	0.0532323	0.0126941
PDACT_KE333301.1_G000350	Aldolase-type TIM barrel family protein LENGTH=286	2.91724	1.93788	2.7989	0.000467621	0.0149738	0.000740033	0.11507	0.131631	0.00928509
PDACT_KE332686.1_G001580	Protein of unknown function (DUF1639) LENGTH=205	1.90633	0.465134	2.57556	0.000467767	0.382783	3.61146e-06	0.11507	0.694689	0.000162376
PDACT_KE332908.1_G000650	nuclear transport factor 2A LENGTH=122	3.19237	0.995703	-1.14633	0.000479886	0.23556	0.162622	0.116427	0.560466	0.371475
PDACT_KE332556.1_G003210	Homeobox protein HOX1A	1.32694	1.2519	1.60273	0.000508588	0.00101186	2.97682e-05	0.120995	0.0256408	0.000837475
PDACT_KE332548.1_G001200	Mannan endo-1,4-beta-mannosidase 2	-3.54972	1.17151	-1.19803	0.000508528	0.285247	0.258124	0.120995	0.611468	0.490249
PDACT_KE334819.1_G000150	unknown protein; BEST Arabidopsis thaliana protein match is: unknown protein . LENGTH=347	-1.34061	-2.3439	-2.07179	0.000514854	4.49768e-09	1.73648e-07	0.121308	3.1474e-06	1.5306e-05
PDACT_KE332665.1_G001420	polyubiquitin 10 LENGTH=457	1.71624	1.17791	1.94789	0.000561318	0.0163302	0.000101637	0.130996	0.137955	0.002125
PDACT_KE332578.1_G003780	guanylate kinase LENGTH=390	1.76271	1.37529	2.07706	0.000592821	0.00674831	6.12239e-05	0.137042	0.083054	0.0014467
PDACT_KE332833.1_G000440	unknown protein; Has 36 Blast hits to 36 proteins in 15 species: Archae - 0; Bacteria - 0; Metazoa - 3; Fungi - 0; Plants - 33; Viruses - 0; Other Eukaryotes - 0 (source: NCBI BLink). LENGTH=265	-1.56863	-1.06941	-0.843373	0.000603376	0.0175177	0.0600339	0.138179	0.142842	0.197618
PDACT_KE332653.1_G000910	Divalent-cation tolerance protein CutA	1.5284	1.97896	2.88496	0.000612672	1.19342e-05	6.83539e-10	0.139008	0.0012368	1.74473e-07
PDACT_KE332802.1_G000500	Pentatricopeptide repeat-containing protein	-2.07108	-0.869268	-1.09758	0.000623734	0.137607	0.0621061	0.14022	0.433006	0.20155
PDACT_KE332634.1_G002020	O-fucosyltransferase family protein LENGTH=445	2.17762	2.6645	4.09049	0.000691526	4.25399e-05	3.09103e-09	0.152659	0.00305229	6.31189e-07
PDACT_KE332611.1_G001830	Major pollen allergen Bet v 1-D/H	-5.26	-3.91934	-3.07703	0.000688593	0.0136869	0.0498067	0.152659	0.125706	0.174676
PDACT_KE332956.1_G000700	Cystathionine beta-synthase (CBS) family protein LENGTH=206	1.12012	-0.601962	0.135904	0.00071384	0.0670464	0.67804	0.156178	0.300953	0.830361
PDACT_KE333553.1_G000100	Pleckstrin homology (PH) domain superfamily protein LENGTH=144	-4.93332	-4.93332	-4.04519	0.000734774	0.000634026	0.0162325	0.159335	0.0192518	0.0827806
PDACT_KE332625.1_G000160	Very-long-chain (3R)-3-hydroxyacyl-[acyl-carrier protein] dehydratase	2.16031	1.60572	1.70719	0.000764645	0.0108518	0.00701538	0.164358	0.109573	0.0467514
PDACT_KE332598.1_G002150	alpha/beta-Hydrolases superfamily protein LENGTH=463	2.55085	1.16984	1.85352	0.000790023	0.107691	0.0123986	0.166886	0.382505	0.0686122
PDACT_KE332612.1_G001180	P-loop containing nucleoside triphosphate hydrolases superfamily protein LENGTH=1065	-2.71708	0.0262064	-1.27381	0.000789799	0.972485	0.0990412	0.166886	0.992651	0.271163
PDACT_KE332555.1_G001540	Aquaporin-like superfamily protein LENGTH=285	2.36251	1.18692	2.11641	0.000809109	0.0809927	0.00246221	0.169456	0.330334	0.0226139
PDACT_KE332757.1_G000430	unknown protein; FUNCTIONS IN: molecular function unknown; INVOLVED IN: biological process unknown; LOCATED IN: endomembrane system; Has 35333 Blast hits to 34131 proteins in 2444 species: Archae - 798; Bacteria - 22429; Metazoa - 974; Fungi - 991; Plants - 531; Viruses - 0; Other Eukaryotes - 9610 (source: NCBI BLink). LENGTH=70	1.57333	-0.438836	-0.650328	0.000832715	0.341902	0.160676	0.172922	0.663011	0.369176
PDACT_KE332702.1_G001480	DUF21 domain-containing protein	1.20107	1.54037	1.61433	0.000856408	2.17358e-05	9.03995e-06	0.175238	0.00192976	0.000333607
PDACT_KE332917.1_G000470	transcription factor-related LENGTH=232	2.59651	1.87507	1.76102	0.000863086	0.0133794	0.0197137	0.175238	0.123939	0.0945888
PDACT_KE333976.1_G000210	Transmembrane emp24 domain-containing protein 10	-2.02724	0.18089	0.58474	0.000865319	0.755176	0.315302	0.175238	0.911882	0.549904
PDACT_KE332706.1_G000700	Serine incorporator 1	0.963351	0.643801	1.10465	0.000877055	0.0255208	0.000141486	0.176159	0.17776	0.00271706
PDACT_KE332548.1_G006430	Phosphatidylinositol N-acetyglucosaminlytransferase subunit P-related LENGTH=464	4.00228	0.644536	1.28209	0.000897564	0.508425	0.207717	0.178812	0.778312	0.430731
PDACT_KE332613.1_G002980	BAG family molecular chaperone regulator 6	2.2301	1.17417	1.20101	0.00095223	0.0725521	0.0665104	0.183728	0.313762	0.210892
PDACT_KE332603.1_G001790	Ethylene-responsive transcription factor 1	4.11979	1.16358	0.971386	0.000940312	0.283136	0.367154	0.183728	0.609824	0.599315
PDACT_KE332620.1_G000560	Adenine nucleotide alpha hydrolases-like superfamily protein LENGTH=201	1.1023	0.112669	0.351653	0.000942959	0.732913	0.28752	0.183728	0.900892	0.521955
PDACT_KE332809.1_G000690	Ethylene-responsive transcription factor 1	1.45946	-0.0957421	0.833721	0.00095095	0.82534	0.0560563	0.183728	0.94267	0.188708
PDACT_KE332782.1_G001030	BAX inhibitor 1 LENGTH=247	1.17979	-0.142287	-0.320859	0.000965368	0.686876	0.363967	0.184808	0.880356	0.596126
PDACT_KE333454.1_G000140	Class I glutamine amidotransferase-like superfamily protein LENGTH=436	3.68213	-0.320837	1.28641	0.0010256	0.73901	0.202033	0.194816	0.903178	0.423673
PDACT_KE332597.1_G000180	Chloride intracellular channel protein 1	1.37721	1.29576	1.59218	0.00106018	0.0020236	0.000167677	0.199836	0.0402622	0.00308235
PDACT_KE333504.1_G000320	unknown protein; FUNCTIONS IN: molecular function unknown; INVOLVED IN: biological process unknown; LOCATED IN: chloroplast; EXPRESSED IN: 23 plant structures; EXPRESSED DURING: 15 growth stages; Has 45 Blast hits to 45 proteins in 11 species: Archae - 0; Bacteria - 0; Metazoa - 0; Fungi - 0; Plants - 45; Viruses - 0; Other Eukaryotes - 0 (source: NCBI BLink). LENGTH=80	1.61223	-1.66341	-1.42494	0.00107269	0.000800809	0.00392954	0.200624	0.0221479	0.0312628
PDACT_KE333942.1_G000170	sterol methyltransferase 1 LENGTH=336	-3.90378	-0.748824	-3.42172	0.00108073	0.484902	0.00345847	0.200624	0.763418	0.0287568
PDACT_KE333109.1_G000510	5'-methylthioadenosine/S-adenosylhomocysteine nucleosidase 1	-1.20838	-0.361211	-0.810914	0.00116157	0.324321	0.0279909	0.214008	0.645755	0.119848
PDACT_KE334821.1_G000130	Glutathione S-transferase 3	1.67562	0.445452	0.340742	0.00118413	0.377042	0.498912	0.216537	0.690615	0.70814
PDACT_KE333265.1_G000260	Transmembrane amino acid transporter family protein LENGTH=550	2.04951	-0.614714	1.81797	0.00119435	0.314713	0.00377616	0.216788	0.636648	0.030488
PDACT_KE332584.1_G003340	Adenylyl-sulfate kinase 3	2.83869	4.20579	5.40368	0.0012412	7.48759e-06	5.99689e-08	0.223192	0.0008761	6.47348e-06
PDACT_KE332952.1_G000700	calreticulin 1b LENGTH=424	3.49181	3.61835	4.54491	0.00124785	0.000886803	7.28093e-05	0.223192	0.0236609	0.00165161
PDACT_KE333702.1_G000230	sterol methyltransferase 1 LENGTH=336	-1.65894	-0.874602	-1.42073	0.00125828	0.0831051	0.00543496	0.223427	0.333853	0.0391586
PDACT_KE332912.1_G000460	WUSCHEL related homeobox 5 LENGTH=182	4.16686	2.44179	-0.469709	0.0012886	0.035673	0.628595	0.227164	0.214343	0.799412
PDACT_KE332608.1_G002210	unknown protein; BEST Arabidopsis thaliana protein match is: unknown protein . LENGTH=335	1.10698	0.257794	0.758687	0.00131364	0.45005	0.02696	0.229924	0.740217	0.116698
PDACT_KE332712.1_G001380	Cysteine proteinase inhibitor 4	2.09714	0.487367	0.619832	0.00132872	0.438976	0.325853	0.230915	0.734294	0.560094
PDACT_KE332636.1_G002550	histone H2A 10 LENGTH=132	2.02991	0.794017	-0.15001	0.00135151	0.196631	0.806942	0.233221	0.51413	0.906599
PDACT_KE332553.1_G005040	Outer envelope pore protein 21, chloroplastic	1.48046	0.29754	0.714536	0.00139291	0.512578	0.11732	0.238684	0.781002	0.302708
PDACT_KE333912.1_G000220	Dynamin family protein n=1 Tax=Sphaerobacter thermophilus (strain DSM 20745 / S 6022) RepID=D1C1K7 SPHTD	2.72997	3.63184	3.71513	0.00143902	4.91898e-05	3.58425e-05	0.244873	0.00341458	0.000958886
PDACT_KE332684.1_G001530	Plant protein of unknown function (DUF247) LENGTH=509	2.38391	1.85146	3.65889	0.00145586	0.0116602	3.70109e-06	0.246031	0.114702	0.000164894
PDACT_KE333070.1_G000590	unknown protein; Has 30201 Blast hits to 17322 proteins in 780 species: Archae - 12; Bacteria - 1396; Metazoa - 17338; Fungi - 3422; Plants - 5037; Viruses - 0; Other Eukaryotes - 2996 (source: NCBI BLink). LENGTH=72	2.83531	-0.316603	3.97663	0.00148827	0.666038	3.04461e-05	0.249785	0.870579	0.000850687
PDACT_KE334038.1_G000110	glutathione S-transferase 7 LENGTH=209	-5.46132	-1.5675	-0.169746	0.00156891	0.338951	0.916303	0.261527	0.660594	0.96261
PDACT_KE332566.1_G002860	unknown protein; Has 29 Blast hits to 29 proteins in 12 species: Archae - 0; Bacteria - 4; Metazoa - 0; Fungi - 0; Plants - 25; Viruses - 0; Other Eukaryotes - 0 (source: NCBI BLink). LENGTH=101	2.16878	1.56596	2.5402	0.00161857	0.0202356	0.000270539	0.267982	0.154519	0.00445218
PDACT_KE332817.1_G000290	n=2 Tax=Oryza sativa subsp. japonica RepID=Q7XR30 ORYSJ	-1.98112	-0.431317	-0.0492335	0.00166791	0.477266	0.935267	0.27247	0.758923	0.971751
PDACT_KE332666.1_G001160	UPI0003D28EE6 related cluster n=1 Tax=unknown RepID=UPI0003D28EE6	-2.85832	0.120938	1.10314	0.00165979	0.916342	0.37411	0.27247	0.973838	0.605618
PDACT_KE332622.1_G002710	Boron transporter 4	4.10259	1.60882	0.375005	0.00171215	0.0337653	0.26616	0.277845	0.207536	0.499042
PDACT_KE333068.1_G000430	1-deoxy-D-xylulose 5-phosphate synthase 1 LENGTH=641	-1.7415	-2.28979	-2.34315	0.00174579	5.39702e-05	3.9267e-05	0.281439	0.0036332	0.00103685
PDACT_KE333830.1_G000110	unknown protein; BEST Arabidopsis thaliana protein match is: unknown protein . LENGTH=303	-2.88175	-2.97692	-2.60082	0.00176126	0.00128345	0.00439935	0.282078	0.0303275	0.0337302
PDACT_KE332629.1_G002380	2-oxoglutarate (2OG) and Fe(II)-dependent oxygenase superfamily protein LENGTH=317	-3.8023	-3.8023	5.28913	0.00178918	0.00152625	0.00625972	0.284688	0.0339069	0.0430865
PDACT_KE333793.1_G000240	basic helix-loop-helix (bHLH) DNA-binding superfamily protein LENGTH=373	-5.16611	-4.39864	-1.15377	0.00188494	0.00751698	0.446102	0.292333	0.0882588	0.668743
PDACT_KE332611.1_G001760	Major pollen allergen Bet v 1-D/H	-4.12202	-3.08294	-1.80718	0.00186346	0.0178942	0.154855	0.292333	0.144808	0.361078
PDACT_KE332571.1_G001510	FUNCTIONS IN: molecular function unknown; INVOLVED IN: biological process unknown; LOCATED IN: plasma membrane; EXPRESSED IN: 22 plant structures; EXPRESSED DURING: 13 growth stages;	-3.05048	-0.472805	0.551075	0.00187879	0.707586	0.672973	0.292333	0.890028	0.827007
PDACT_KE332671.1_G000680	Histone H2B	2.25071	0.100457	0.0568681	0.00186094	0.884729	0.934833	0.292333	0.963869	0.971589
PDACT_KE332622.1_G001150	Protein NRT1/ PTR FAMILY 6.2	1.5576	3.97338	2.85029	0.00192824	5.13599e-13	5.41652e-08	0.297167	2.09754e-09	5.89895e-06
PDACT_KE332719.1_G000470	Zinc finger protein CONSTANS-LIKE 7	1.07707	0.816075	1.45662	0.00195698	0.0184315	3.28803e-05	0.299513	0.146971	0.000898663
PDACT_KE332864.1_G000370	unknown protein; FUNCTIONS IN: molecular function unknown; LOCATED IN: chloroplast, chloroplast stroma; EXPRESSED IN: 21 plant structures; EXPRESSED DURING: 13 growth stages; Has 30201 Blast hits to 17322 proteins in 780 species: Archae - 12; Bacteria - 1396; Metazoa - 17338; Fungi - 3422; Plants - 5037; Viruses - 0; Other Eukaryotes - 2996 (source: NCBI BLink). LENGTH=210	1.9599	0.708033	1.06879	0.00199235	0.249705	0.0842326	0.299513	0.576644	0.245653
PDACT_KE333126.1_G000180	Chaperone protein dnaJ 3	1.95707	0.286839	1.18933	0.00196868	0.639136	0.054875	0.299513	0.855909	0.186163
PDACT_KE332731.1_G000580	Magnesium transporter CorA-like family protein LENGTH=540	1.074	0.0302206	-0.103396	0.00198937	0.930088	0.764597	0.299513	0.979494	0.882593
PDACT_KE332557.1_G003650	Peroxiredoxin-6	1.78842	2.68938	4.35589	0.00203881	6.72092e-06	1.22257e-11	0.302781	0.000819284	6.37399e-09
PDACT_KE332560.1_G002250	Homeobox-leucine zipper protein family LENGTH=294	1.07981	1.28676	1.50277	0.00203337	0.000252039	2.12585e-05	0.302781	0.0104148	0.0006447
PDACT_KE332613.1_G001760	GRAM domain-containing protein / ABA-responsive protein-related LENGTH=219	2.35027	3.24032	4.26262	0.00206547	4.23843e-05	2.80814e-07	0.304894	0.00305229	2.2197e-05
PDACT_KE333816.1_G000260	Dihydrolipoyl dehydrogenase	-0.876703	-0.665088	-0.969703	0.00209597	0.0191606	0.000684377	0.307543	0.149908	0.00879391
PDACT_KE335912.1_G000100	Peptidyl-prolyl cis-trans isomerase PASTICCINO1	2.80638	2.4003	2.50252	0.00211407	0.00699518	0.00534808	0.308351	0.0848144	0.0386822
PDACT_KE332875.1_G000170	PHD finger-like domain-containing protein 5A	1.91278	2.02703	2.34597	0.00213044	0.00117992	0.000206323	0.308901	0.0286833	0.00361642
PDACT_KE332706.1_G000750	disease resistance protein (TIR-NBS-LRR class) LENGTH=1400	-1.43783	-0.992207	-0.731053	0.00214701	0.031827	0.112877	0.309473	0.200795	0.295602
PDACT_KE332956.1_G000810	Cystathionine beta-synthase (CBS) family protein LENGTH=206	0.987349	-0.75705	-0.0813212	0.00216969	0.0185104	0.799051	0.310912	0.147171	0.901969
PDACT_KE332599.1_G000590	UPI0003D78A1A related cluster n=1 Tax=unknown RepID=UPI0003D78A1A	-1.37589	-1.54169	-1.64575	0.00228239	0.000664472	0.000297056	0.321423	0.0198564	0.00475134
PDACT_KE333001.1_G000100	Protein kinase superfamily protein LENGTH=400	-2.43817	1.07621	1.74476	0.00227772	0.223053	0.0554847	0.321423	0.546917	0.187504
PDACT_KE333014.1_G000430	aldose 1-epimerase family protein LENGTH=306	0.916377	-0.2973	-0.341114	0.00226127	0.318729	0.25299	0.321423	0.640456	0.484885
PDACT_KE333332.1_G000300	beta-amylase 1 LENGTH=575	1.69648	-0.385298	-0.139178	0.00231116	0.477733	0.797363	0.323616	0.759069	0.90106
PDACT_KE332637.1_G000400	Alpha-N-acetylglucosaminidase	1.64319	2.08177	3.18964	0.00244897	0.000147623	2.47595e-08	0.334908	0.00729305	3.29731e-06
PDACT_KE332622.1_G000990	Pectin lyase-like superfamily protein LENGTH=439	3.83099	3.03957	3.42394	0.00241446	0.010184	0.00511283	0.334908	0.10601	0.0374923
PDACT_KE332892.1_G000340	Zinc finger HIT domain-containing protein 2	1.44324	1.20761	1.31083	0.00244057	0.0107468	0.00574931	0.334908	0.108863	0.0407505
PDACT_KE332617.1_G003200	Protein kinase family protein LENGTH=433	-2.37498	-1.29098	-2.81569	0.00245369	0.0882431	0.00043787	0.334908	0.344536	0.00629298
PDACT_KE333354.1_G000150	Galactoside 2-alpha-L-fucosyltransferase	-3.38142	-0.429379	-2.80047	0.00246014	0.685761	0.0112979	0.334908	0.879923	0.0644122
PDACT_KE332600.1_G002980	2-phosphoglycerate kinase	2.72563	0.701478	1.78969	0.00253844	0.405074	0.0397059	0.343657	0.710456	0.149803
PDACT_KE332973.1_G000510	polymerase gamma 1 LENGTH=1049	-3.01104	-2.91406	-3.58676	0.00257062	0.00336736	0.000442341	0.345427	0.0548754	0.00633496
PDACT_KE332556.1_G000150	Nuclear migration protein nudC	1.39683	0.360049	0.714047	0.00257971	0.429487	0.118524	0.345427	0.726972	0.30482
PDACT_KE332868.1_G000890	Unknown protein	3.23685	5.19887	5.48787	0.00265765	4.2623e-05	2.31624e-05	0.352016	0.00305229	0.000686301
PDACT_KE332629.1_G001710	Cysteine proteinase inhibitor 5	1.86768	1.27639	1.6994	0.00265606	0.0368045	0.00599075	0.352016	0.217892	0.0419585
PDACT_KE332555.1_G002200	unknown protein; FUNCTIONS IN: molecular function unknown; INVOLVED IN: biological process unknown; LOCATED IN: plasma membrane; EXPRESSED IN: 21 plant structures; EXPRESSED DURING: 11 growth stages; Has 16 Blast hits to 16 proteins in 8 species: Archae - 0; Bacteria - 0; Metazoa - 0; Fungi - 0; Plants - 16; Viruses - 0; Other Eukaryotes - 0 (source: NCBI BLink). LENGTH=84	3.36094	1.08052	4.55658	0.00272447	0.14862	0.000322114	0.358927	0.448939	0.00502745
PDACT_KE333095.1_G000450	protein n=3 Tax=Oryza RepID=Q5N9T4 ORYSJ	1.39141	-0.0637672	0.797349	0.00274044	0.888962	0.0825882	0.3591	0.964102	0.242771
PDACT_KE332678.1_G001420	Monofunctional biosynthetic peptidoglycan transglycosylase	-3.9922	-4.09215	-4.63701	0.0027893	0.00211493	0.00058823	0.363559	0.0413932	0.00792849
PDACT_KE332859.1_G000870	Trypsin family protein LENGTH=579	-2.33036	0.92695	1.11651	0.00285834	0.396834	0.317775	0.370587	0.70472	0.551995
PDACT_KE335050.1_G000140	Unknown protein	-2.38796	-3.51637	-3.34927	0.00292865	2.96857e-05	6.14404e-05	0.377361	0.00237719	0.00144902
PDACT_KE332619.1_G001470	inositol transporter 1 LENGTH=509	1.33368	0.723708	1.35494	0.00295679	0.102678	0.00254475	0.377361	0.373183	0.02311
PDACT_KE332903.1_G000470	histone H2A 2 LENGTH=131	1.08179	-0.223666	-0.389749	0.00295564	0.534946	0.280477	0.377361	0.794685	0.514291
PDACT_KE333061.1_G000110	60 kDa chaperonin 1	1.60019	1.64056	1.86373	0.00303307	0.00239745	0.000614214	0.383386	0.0447768	0.00818687
PDACT_KE333531.1_G000230	2-oxoglutarate (2OG) and Fe(II)-dependent oxygenase superfamily protein LENGTH=507	-4.58266	-1.80703	-4.58266	0.0030353	0.334521	0.00325276	0.383386	0.656135	0.0275114
PDACT_KE332670.1_G001340	Unknown protein	1.35696	1.83372	2.11349	0.00326856	8.66921e-05	7.39862e-06	0.410732	0.00495175	0.000286407
PDACT_KE333175.1_G000330	Aluminium induced protein with YGL and LRDR motifs LENGTH=248	1.27754	1.29481	1.09652	0.00332463	0.00293106	0.0114182	0.415647	0.0505495	0.0648602
PDACT_KE333797.1_G000310	Galactoside 2-alpha-L-fucosyltransferase	-4.05181	-2.88572	-4.42661	0.00338018	0.0294778	0.00157968	0.418323	0.192922	0.0162915
PDACT_KE332704.1_G001760	S-adenosyl-L-methionine-dependent methyltransferases superfamily protein LENGTH=612	1.43803	0.506341	1.08277	0.00336753	0.29415	0.0261405	0.418323	0.618503	0.114486
PDACT_KE332724.1_G001660	Thioesterase superfamily protein LENGTH=156	1.94536	0.332815	0.308658	0.00352119	0.605625	0.632138	0.431417	0.835927	0.801548
PDACT_KE332548.1_G006440	Protein of unknown function (DUF3741) LENGTH=924	3.07826	0.430431	1.50801	0.00351159	0.641925	0.122206	0.431417	0.857252	0.310475
PDACT_KE332886.1_G000180	Protein TIC 20-I, chloroplastic	1.28544	1.37648	1.66918	0.00376099	0.00195205	0.000194463	0.435837	0.0392923	0.00346302
PDACT_KE333109.1_G000530	Ribosome maturation protein SBDS	-1.06032	-0.847684	-0.892742	0.00370885	0.0195024	0.0142699	0.435837	0.15146	0.0759587
PDACT_KE332657.1_G001920	n=1 Tax=Oryza sativa RepID=Q259M7 ORYSA	1.3568	1.08752	0.626213	0.00378849	0.0195223	0.176369	0.435837	0.15146	0.390132
PDACT_KE333150.1_G000570	Phosphoglycerate mutase, 2,3-bisphosphoglycerate-independent LENGTH=557	1.2779	0.835955	1.31195	0.00374216	0.0557273	0.00294026	0.435837	0.27335	0.0256281
PDACT_KE332558.1_G001320	Putative serine esterase family protein LENGTH=802	-0.98403	-0.533608	-0.374066	0.00361123	0.111664	0.264327	0.435837	0.389275	0.49666
PDACT_KE332788.1_G000730	Eukaryotic aspartyl protease family protein LENGTH=425	2.478	1.2986	0.46758	0.00378131	0.113548	0.564859	0.435837	0.392492	0.755613
PDACT_KE332687.1_G001100	LRR and NB-ARC domains-containing disease resistance protein LENGTH=874	-4.39173	-2.73513	-3.71655	0.00373239	0.141074	0.0383582	0.435837	0.437759	0.146566
PDACT_KE332835.1_G000960	unknown protein; Has 34 Blast hits to 34 proteins in 12 species: Archae - 0; Bacteria - 0; Metazoa - 0; Fungi - 0; Plants - 34; Viruses - 0; Other Eukaryotes - 0 (source: NCBI BLink). LENGTH=98	1.79808	0.763625	1.67622	0.00375661	0.207377	0.00670488	0.435837	0.527348	0.0451736
PDACT_KE332613.1_G000540	Hydroxyproline-rich glycoprotein n=2 Tax=Populus trichocarpa RepID=U5FXW2 POPTR	1.39049	0.318544	0.417623	0.00367403	0.499092	0.376605	0.435837	0.772618	0.607884
PDACT_KE332562.1_G003490	Copper amine oxidase family protein LENGTH=776	-2.09307	0.387865	-0.797798	0.00368781	0.575957	0.252254	0.435837	0.819918	0.483864
PDACT_KE332582.1_G000760	Glutamine--fructose-6-phosphate aminotransferase [isomerizing] 2	1.10611	-0.138783	0.290029	0.00365129	0.713276	0.442507	0.435837	0.892718	0.665471
PDACT_KE333294.1_G000400	Coatomer, alpha subunit LENGTH=1216	-3.05787	0.147758	-0.383417	0.00359986	0.889909	0.718935	0.435837	0.964327	0.855557
PDACT_KE332637.1_G000890	Cysteine and glycine-rich protein 1	1.43827	-0.0509154	0.808328	0.00365503	0.916883	0.0987402	0.435837	0.974072	0.270577
PDACT_KE332766.1_G001100	U-box domain-containing protein LENGTH=400	-2.64599	-2.11717	1.22161	0.00386209	0.0495714	0.360231	0.441151	0.255362	0.593004
PDACT_KE332551.1_G005130	Expressed protein n=3 Tax=Oryza sativa subsp. japonica RepID=Q10GL4 ORYSJ	4.3768	-1.30985	1.5817	0.0038887	0.274763	0.229665	0.441151	0.601411	0.457873
PDACT_KE332554.1_G005660	unknown protein; Has 30201 Blast hits to 17322 proteins in 780 species: Archae - 12; Bacteria - 1396; Metazoa - 17338; Fungi - 3422; Plants - 5037; Viruses - 0; Other Eukaryotes - 2996 (source: NCBI BLink). LENGTH=72	3.9219	-0.289897	1.47587	0.00388718	0.280911	0.110224	0.441151	0.607863	0.2909
PDACT_KE332676.1_G000670	unknown protein; FUNCTIONS IN: molecular function unknown; INVOLVED IN: biological process unknown; LOCATED IN: mitochondrion; BEST Arabidopsis thaliana protein match is: unknown protein . LENGTH=165	2.89949	1.52432	1.71555	0.0039327	0.109128	0.0733972	0.442965	0.384759	0.225328
PDACT_KE332612.1_G001190	P-loop containing nucleoside triphosphate hydrolases superfamily protein LENGTH=1050	-2.5739	0.252877	-1.38767	0.00394084	0.764684	0.106589	0.442965	0.916006	0.284671
PDACT_KE332885.1_G000340	serine carboxypeptidase-like 33 LENGTH=478	5.03784	4.42721	0.250266	0.00403265	0.00621224	0.330861	0.447482	0.0785474	0.565225
PDACT_KE332548.1_G003410	Late embryogenesis abundant protein D-19	2.97889	-2.48199	-0.736087	0.00403581	0.00739445	0.431882	0.447482	0.0874899	0.656625
PDACT_KE332694.1_G001090	Domain of unknown function (DUF23) LENGTH=504	2.27317	0.201983	0.880824	0.00400655	0.787833	0.245988	0.447482	0.925874	0.477025
PDACT_KE332551.1_G002920	Disease resistance protein (CC-NBS-LRR class) family LENGTH=900	-1.64548	-0.535616	-0.439805	0.0041168	0.33821	0.431693	0.454405	0.659531	0.656582
PDACT_KE332546.1_G007280	26S protease regulatory subunit 8 homolog A	0.926438	0.308228	0.293383	0.00418368	0.337435	0.361456	0.459717	0.658917	0.593999
PDACT_KE333869.1_G000120	Cytochrome P450 superfamily protein LENGTH=490	-3.19298	-1.17111	-1.01685	0.00423738	0.26232	0.329006	0.461545	0.588594	0.563541
PDACT_KE332590.1_G003350	Auxin-responsive protein IAA30	2.17901	0.293525	-1.18624	0.00423799	0.688075	0.110483	0.461545	0.880847	0.2913
PDACT_KE332805.1_G000700	glycine-rich protein LENGTH=356	1.22208	0.627585	0.861192	0.00431298	0.138599	0.0428408	0.465574	0.434079	0.157789
PDACT_KE332949.1_G000390	alpha/beta-Hydrolases superfamily protein LENGTH=336	-1.88031	0.145349	-2.30421	0.00429898	0.818848	0.000581348	0.465574	0.940123	0.00786601
PDACT_KE332633.1_G002230	Histone-lysine N-methyltransferase ASHR1	3.36904	2.399	3.19687	0.00436004	0.0273817	0.00609264	0.468589	0.185707	0.0423325
PDACT_KE333387.1_G000300	germin-like protein 4 LENGTH=220	-3.93541	-5.49279	-4.30028	0.00448984	0.000146913	0.00224293	0.476273	0.00727263	0.0211548
PDACT_KE332648.1_G001520	laccase 6 LENGTH=569	-4.40784	-3.98841	-3.93941	0.00446884	0.00969294	0.0109606	0.476273	0.103162	0.0633442
PDACT_KE332588.1_G000170	Stress protein DDR48 n=1 Tax=Trichophyton rubrum (strain ATCC MYA-4607 / CBS 118892) RepID=F2SKB1 TRIRC	2.54351	0.581135	0.415841	0.00448978	0.484374	0.621073	0.476273	0.762872	0.794289
PDACT_KE334422.1_G000160	protein n=1 Tax=Oryza sativa subsp. japonica RepID=Q0E4A0 ORYSJ	1.82063	0.413195	0.757987	0.00451571	0.509256	0.22813	0.476952	0.778812	0.455925
PDACT_KE332681.1_G001380	Magnesium transporter CorA-like family protein LENGTH=540	0.880112	0.154235	0.49959	0.00461976	0.618296	0.107299	0.485849	0.844212	0.285976
PDACT_KE333385.1_G000160	NAD(P)-binding Rossmann-fold superfamily protein LENGTH=321	1.17481	0.144942	0.163395	0.00464623	0.723521	0.69012	0.486544	0.896737	0.837454
PDACT_KE333588.1_G000270	hydroxyproline-rich glycoprotein family protein LENGTH=370	-4.09978	-3.0077	0.583564	0.00471594	0.0904139	0.757123	0.491742	0.349409	0.877978
PDACT_KE332564.1_G003120	C2H2-like zinc finger protein LENGTH=270	1.7323	2.54784	3.32138	0.00478566	5.00164e-05	3.0278e-07	0.496897	0.0034524	2.34788e-05
PDACT_KE333109.1_G000120	DNA-directed RNA polymerase III subunit RPC9	0.85552	0.816223	1.43764	0.0048909	0.00721804	2.88912e-06	0.50392	0.0861944	0.000138542
PDACT_KE332738.1_G001070	Small nuclear ribonucleoprotein family protein LENGTH=129	1.26378	-0.23934	-0.291607	0.00489443	0.588948	0.510657	0.50392	0.827485	0.717363
PDACT_KE333316.1_G000270	early nodulin-related LENGTH=115	3.83291	3.25712	0.843868	0.00503938	0.0120895	0.380073	0.516673	0.117015	0.610564
PDACT_KE332624.1_G000630	trehalose-6-phosphate synthase LENGTH=942	-1.12556	0.0235754	-1.54499	0.00515329	0.95234	0.000157242	0.526151	0.98627	0.00294801
PDACT_KE332606.1_G000140	S-ribonuclease binding protein 1 LENGTH=325	0.941308	2.16328	2.71564	0.00525001	5.13413e-10	2.16048e-14	0.533802	5.24195e-07	2.52097e-11
PDACT_KE333008.1_G000640	Translation initiation factor SUI1 family protein LENGTH=113	1.15775	0.113386	0.259579	0.00528484	0.782093	0.526874	0.535122	0.923675	0.728913
PDACT_KE333110.1_G000220	Two pore potassium channel a	0.997262	0.804734	1.77244	0.0053614	0.0241493	1.10198e-06	0.537482	0.171722	6.61839e-05
PDACT_KE333057.1_G000270	Disease resistance protein (CC-NBS-LRR class) family LENGTH=901	-1.38541	-0.972875	-1.20673	0.00537193	0.0481766	0.0148925	0.537482	0.251979	0.0781618
PDACT_KE332553.1_G000530	NADH dehydrogenase [ubiquinone] 1 alpha subcomplex subunit 13-B	-1.89129	0.680034	0.913556	0.00537395	0.301042	0.165821	0.537482	0.624696	0.375842
PDACT_KE333408.1_G000300	diacylglycerol kinase 2 LENGTH=712	1.38326	1.75432	2.58957	0.00539703	0.000443497	4.38473e-07	0.537596	0.0150757	3.20727e-05
PDACT_KE332563.1_G001840	O-acetyl-ADP-ribose deacetylase	0.93462	1.07796	1.65447	0.00555526	0.0013965	1.26213e-06	0.547097	0.032064	7.3812e-05
PDACT_KE333088.1_G000680	Calcyclin-binding protein	1.32431	0.853935	1.17683	0.00556742	0.0710909	0.0134422	0.547097	0.310519	0.0727447
PDACT_KE333310.1_G000420	Ribonuclease H-like superfamily protein LENGTH=484	3.63251	0.680096	0.360142	0.00560404	0.160996	0.279505	0.547097	0.467691	0.513571
PDACT_KE332869.1_G000960	zinc ion binding;nucleic acid binding LENGTH=515	-4.53898	-0.78638	-2.23829	0.00559275	0.640902	0.192065	0.547097	0.856647	0.410271
PDACT_KE334991.1_G000150	Unknown protein	-1.44873	0.168008	0.561312	0.00554405	0.741686	0.272285	0.547097	0.904553	0.505113
PDACT_KE332634.1_G001160	Pathogenesis-related thaumatin superfamily protein LENGTH=345	-3.63608	-0.567325	-2.81227	0.00564649	0.635082	0.0269448	0.549054	0.853838	0.11666
PDACT_KE333156.1_G000150	sodium hydrogen exchanger 2 LENGTH=546	1.04359	-0.567257	-0.697967	0.00568558	0.131494	0.0644436	0.55067	0.423629	0.206233
PDACT_KE332555.1_G005590	histone H1-3 LENGTH=167	1.64245	-0.191583	0.879762	0.00571163	0.741296	0.132324	0.551015	0.904508	0.326576
PDACT_KE333899.1_G000140	UPI0003DEC06E related cluster n=1 Tax=unknown RepID=UPI0003DEC06E	2.38026	3.34885	4.17137	0.00577674	0.0012816	0.000373551	0.552564	0.0303146	0.00561599
PDACT_KE332633.1_G002300	unknown protein; FUNCTIONS IN: molecular function unknown; INVOLVED IN: biological process unknown; LOCATED IN: endoplasmic reticulum; EXPRESSED IN: 25 plant structures; EXPRESSED DURING: 15 growth stages; Has 34 Blast hits to 34 proteins in 11 species: Archae - 0; Bacteria - 0; Metazoa - 0; Fungi - 0; Plants - 34; Viruses - 0; Other Eukaryotes - 0 (source: NCBI BLink). LENGTH=197	3.50361	4.28097	0.648184	0.00579264	0.0027823	0.160087	0.552564	0.0490132	0.368509
PDACT_KE332560.1_G004040	Thioredoxin reductase	-0.706896	-0.761257	-0.984843	0.0058399	0.00300726	0.000134118	0.552564	0.0512838	0.0026145
PDACT_KE332659.1_G000830	Calcium-binding EF-hand family protein LENGTH=142	3.82869	0.524462	1.62567	0.00584489	0.196656	0.0470506	0.552564	0.51413	0.168311
PDACT_KE332588.1_G001600	Chaperone protein dnaJ 3	1.33546	0.134017	0.32342	0.00583225	0.778393	0.497437	0.552564	0.922094	0.707147
PDACT_KE332763.1_G001430	nicotinamidase 1 LENGTH=244	-1.22731	-0.0623793	-0.263929	0.00586299	0.886528	0.547192	0.552564	0.963869	0.743424
PDACT_KE334644.1_G000160	S-adenosylmethionine synthase 1	-0.872152	-0.623186	-0.57475	0.00592456	0.0482831	0.0684789	0.554105	0.252266	0.21519
PDACT_KE332927.1_G000560	unknown protein; LOCATED IN: chloroplast stroma, chloroplast; EXPRESSED IN: 16 plant structures; EXPRESSED DURING: 10 growth stages; BEST Arabidopsis thaliana protein match is: unknown protein . LENGTH=578	1.18826	-0.140944	0.530982	0.00591216	0.741736	0.214998	0.554105	0.904569	0.439522
PDACT_KE332582.1_G000710	Pentatricopeptide repeat-containing protein	-2.7991	-0.144891	-0.670859	0.00595196	0.889777	0.520037	0.55455	0.964323	0.723873
PDACT_KE332545.1_G002650	CTP synthase family protein LENGTH=591	-2.88856	-2.50215	-3.36548	0.00600705	0.0157019	0.00166968	0.55546	0.135148	0.0169066
PDACT_KE332599.1_G003290	Cytochrome P450 superfamily protein LENGTH=513	-4.10328	-1.90309	0.875603	0.00600652	0.186725	0.542539	0.55546	0.501537	0.740675
PDACT_KE333648.1_G000180	Bifunctional inhibitor/lipid-transfer protein/seed storage 2S albumin superfamily protein LENGTH=170	-2.96483	-2.96483	0.17817	0.00624518	0.00540615	0.907713	0.571014	0.0723892	0.957618
PDACT_KE332963.1_G000580	protein n=3 Tax=Oryza sativa RepID=Q5VRW8 ORYSJ	-2.89814	2.00422	-2.25009	0.00623748	0.220575	0.0847663	0.571014	0.543869	0.24663
PDACT_KE332679.1_G001400	sucrose synthase 4 LENGTH=808	1.52986	-0.332834	-1.08107	0.00620042	0.543301	0.0508082	0.571014	0.800282	0.177048
PDACT_KE332710.1_G001010	Plant protein of unknown function (DUF827) LENGTH=806	-2.5353	0.0788109	0.0344668	0.00632874	0.933539	0.969814	0.576504	0.980411	0.987629
PDACT_KE333272.1_G000360	Aldo-keto reductase family 4 member C9	-1.00476	-0.238839	-0.32124	0.00637497	0.511525	0.37805	0.578564	0.780352	0.608731
PDACT_KE332813.1_G001270	3-isopropylmalate dehydratase large subunit	0.990229	1.15058	1.22838	0.00646583	0.00160652	0.000774902	0.582552	0.0350544	0.00960942
PDACT_KE332606.1_G001100	PQ-loop repeat family protein / transmembrane family protein LENGTH=392	1.94421	-0.660785	1.83702	0.00646716	0.339905	0.00982704	0.582552	0.661664	0.0589334
PDACT_KE332613.1_G001900	Zinc finger protein CONSTANS-LIKE 14	2.67565	0.741043	0.490606	0.00650388	0.415412	0.588059	0.582552	0.717773	0.771423
PDACT_KE332582.1_G002740	purple acid phosphatase 27 LENGTH=611	-2.31915	0.180005	-0.922681	0.00651401	0.825535	0.261904	0.582552	0.94267	0.494239
PDACT_KE333172.1_G000250	UPI0003DE90F0 related cluster n=1 Tax=unknown RepID=UPI0003DE90F0	4.37701	2.90517	3.91075	0.00654439	0.0194435	0.00913453	0.583141	0.151165	0.0560002
PDACT_KE332577.1_G000910	Protein kinase superfamily protein LENGTH=412	0.957138	1.48204	2.11718	0.00664538	3.01429e-05	4.71561e-09	0.58365	0.00240593	9.09853e-07
PDACT_KE333021.1_G000520	Heat shock 70 kDa protein 8	1.61012	1.88898	2.27576	0.00659078	0.00157321	0.000172081	0.58365	0.0346051	0.00314207
PDACT_KE332771.1_G000190	Aluminium induced protein with YGL and LRDR motifs LENGTH=248	1.23839	0.893204	0.824116	0.00663718	0.0488611	0.0691494	0.58365	0.253671	0.216376
PDACT_KE333116.1_G000130	Aquaporin-like superfamily protein LENGTH=139	-1.67068	-0.422539	-1.18513	0.00661408	0.480529	0.0510448	0.58365	0.760602	0.17757
PDACT_KE332603.1_G000200	Protein of unknown function, DUF538 LENGTH=166	1.35085	2.39974	3.56815	0.00679943	3.15319e-06	4.09693e-11	0.591688	0.000468278	1.71792e-08
PDACT_KE332893.1_G000470	cytochrome c-2 LENGTH=112	1.25795	0.572463	0.106541	0.00680934	0.212917	0.816497	0.591688	0.534213	0.912291
PDACT_KE332618.1_G000320	Homeobox-leucine zipper protein family LENGTH=294	1.64089	0.267415	2.57405	0.00677882	0.651097	3.93565e-05	0.591688	0.861583	0.0010381
PDACT_KE332680.1_G001480	K(+)-insensitive pyrophosphate-energized proton pump	4.34804	-0.44666	-0.644941	0.00683979	0.67691	0.522715	0.592234	0.875674	0.725923
PDACT_KE332620.1_G001430	unknown protein; FUNCTIONS IN: molecular function unknown; INVOLVED IN: response to oxidative stress; LOCATED IN: endomembrane system; EXPRESSED IN: 21 plant structures; EXPRESSED DURING: 13 growth stages; BEST Arabidopsis thaliana protein match is: unknown protein . LENGTH=123	1.05646	1.10204	0.33405	0.00687953	0.00484511	0.38898	0.593578	0.0678039	0.618934
PDACT_KE333575.1_G000290	UPI0003DEB025 related cluster n=1 Tax=unknown RepID=UPI0003DEB025	-2.07636	1.71176	1.35922	0.00692444	0.0243179	0.0710734	0.595356	0.172271	0.220509
PDACT_KE333375.1_G000190	Terpenoid cyclases/Protein prenyltransferases superfamily protein LENGTH=598	-5.24982	-6.07931	-6.07931	0.00699913	0.000387824	0.000478357	0.597584	0.0138129	0.00672885
PDACT_KE333218.1_G000100	Fasciclin-like arabinogalactan protein n=3 Tax=Medicago truncatula RepID=G7JPJ5 MEDTR	1.71412	0.284414	-0.0153729	0.0069846	0.645804	0.980203	0.597584	0.859267	0.99174
PDACT_KE332615.1_G002420	glycine-rich protein LENGTH=356	0.908793	0.331834	0.725743	0.00705091	0.321926	0.0309578	0.599915	0.643882	0.127664
PDACT_KE332614.1_G002030	Carboxymethylenebutenolidase	0.921211	1.39055	2.22034	0.00710737	5.68253e-05	3.68735e-10	0.601265	0.00377357	1.05105e-07
PDACT_KE332582.1_G001330	Pre-mRNA branch site p14-like protein	1.24019	1.28153	1.89532	0.00714039	0.0054628	5.32459e-05	0.601265	0.0726318	0.00130083
PDACT_KE332551.1_G005720	Histone superfamily protein LENGTH=103	1.19952	0.418697	0.675034	0.00713947	0.342503	0.126972	0.601265	0.663454	0.317935
PDACT_KE332599.1_G001380	Peroxiredoxin-2C	1.04511	0.937322	1.03631	0.00720437	0.0157292	0.00770242	0.604244	0.135318	0.0498412
PDACT_KE332645.1_G001590	cytochrome B561-1 LENGTH=230	1.35816	0.237707	0.90377	0.00722508	0.632554	0.0711482	0.604244	0.852496	0.220713
PDACT_KE332553.1_G004230	U-box domain-containing protein 15	2.1177	6.0405	4.36108	0.00747079	1.72624e-09	1.82109e-06	0.606368	1.41e-06	9.85078e-05
PDACT_KE333804.1_G000160	1-deoxy-D-xylulose 5-phosphate synthase 1 LENGTH=641	1.36925	-1.65323	-1.19181	0.00732199	0.00140877	0.0198672	0.606368	0.0320823	0.0950459
PDACT_KE332565.1_G001060	Chaperone protein DnaJ	0.920354	0.893919	1.19532	0.00740977	0.009211	0.000536527	0.606368	0.0995616	0.00737769
PDACT_KE332557.1_G001460	nicotianamine synthase 4 LENGTH=324	1.92614	0.651222	-1.43151	0.00747271	0.351334	0.0440015	0.606368	0.670585	0.160807
PDACT_KE335048.1_G000140	1,2-dihydroxy-3-keto-5-methylthiopentene dioxygenase 2	0.981172	0.276666	0.748755	0.00735613	0.445887	0.0400474	0.606368	0.737813	0.150694
PDACT_KE332601.1_G001770	Histone superfamily protein LENGTH=103	2.11272	-0.298428	0.0527767	0.00735537	0.693378	0.9444	0.606368	0.883795	0.975598
PDACT_KE332577.1_G001820	Histone superfamily protein LENGTH=136	2.53556	0.294649	-1.77731	0.0073241	0.733494	0.0266672	0.606368	0.90106	0.11598
PDACT_KE333321.1_G000390	Protein NRT1/ PTR FAMILY 8.1	-2.01143	-0.182775	-2.60616	0.00747319	0.800859	0.000703084	0.606368	0.931262	0.00895445
PDACT_KE332549.1_G000120	Uncharacterised conserved protein UCP015417, vWA LENGTH=655	3.57703	0	0	0.00745712	1	1	0.606368	1	1
PDACT_KE332603.1_G001920	REF/SRPP-like protein	1.13321	0.622477	2.32501	0.00756943	0.138979	1.23808e-07	0.610136	0.434712	1.18046e-05
PDACT_KE332558.1_G001200	nodulin MtN21 /EamA-like transporter family protein LENGTH=359	-1.80543	-0.672374	-1.21177	0.00756194	0.306961	0.0685864	0.610136	0.630555	0.215409
PDACT_KE332606.1_G001120	PQ-loop repeat family protein / transmembrane family protein LENGTH=392	1.85945	-0.575741	2.04043	0.00760499	0.395478	0.00359918	0.610992	0.703602	0.0295097
PDACT_KE332556.1_G001430	Very-long-chain (3R)-3-hydroxyacyl-[acyl-carrier protein] dehydratase 3	1.09847	0.553341	0.688681	0.00764652	0.175397	0.0922945	0.612322	0.487372	0.259773
PDACT_KE332687.1_G001550	HXXXD-type acyl-transferase family protein LENGTH=461	-2.42789	0.294467	-1.0439	0.00769014	0.734259	0.233108	0.613808	0.901475	0.462255
PDACT_KE332582.1_G003020	regulatory protein (NPR1) LENGTH=593	-1.6198	-0.0678356	-1.24433	0.00771602	0.90852	0.0386922	0.613874	0.971562	0.147429
PDACT_KE333092.1_G000690	Conidiophore development protein hymA	0.783873	-0.355665	0.217309	0.00777166	0.226719	0.459348	0.614312	0.551198	0.678841
PDACT_KE332561.1_G002970	Galactosyltransferase family protein LENGTH=393	1.31245	0.164483	0.891604	0.00775474	0.735569	0.0690509	0.614312	0.901902	0.216288
PDACT_KE332729.1_G000750	Chaperone protein htpG family protein LENGTH=780	1.18501	1.36363	1.22755	0.00801268	0.00237581	0.00606755	0.619377	0.0444925	0.0422264
PDACT_KE332969.1_G000320	cycloartenol synthase 1 LENGTH=759	-1.18813	-1.18373	-1.09406	0.0080006	0.00814243	0.0145397	0.619377	0.0927578	0.076851
PDACT_KE332684.1_G001930	n=1 Tax=Oryza sativa subsp. japonica RepID=Q7XMF7 ORYSJ	-2.30954	2.0663	0.423528	0.00800717	0.147884	0.744132	0.619377	0.448538	0.8703
PDACT_KE332610.1_G001440	Bifunctional uridylyltransferase/uridylyl-removing enzyme	-1.80034	0.791593	0.565458	0.00792872	0.229459	0.389782	0.619377	0.554013	0.619686
PDACT_KE332716.1_G001990	DERLIN-1 LENGTH=266	0.872637	0.275381	0.541681	0.00790112	0.399265	0.0980805	0.619377	0.706192	0.269435
PDACT_KE332738.1_G001190	Adenine nucleotide alpha hydrolases-like superfamily protein LENGTH=162	1.19929	-0.0501392	0.554691	0.00790241	0.910366	0.214325	0.619377	0.972258	0.438455
PDACT_KE333680.1_G000240	Uncharacterised protein family (UPF0114) LENGTH=273	3.52711	-0.0725069	-0.696841	0.00794369	0.950156	0.539113	0.619377	0.985605	0.738426
PDACT_KE332772.1_G000620	protein n=3 Tax=Oryza sativa RepID=Q6ES39 ORYSJ	1.04773	1.79991	1.33526	0.00806784	7.88216e-06	0.000793444	0.619732	0.000906782	0.00975542
PDACT_KE332552.1_G000550	DCD (Development and Cell Death) domain protein LENGTH=349	0.922357	0.697972	1.24542	0.0080594	0.0442076	0.000378276	0.619732	0.241084	0.00566306
PDACT_KE332604.1_G002850	protein n=1 Tax=Oryza sativa subsp. japonica RepID=Q0IZC5 ORYSJ	2.77329	4.41345	2.07778	0.00830659	0.00139417	0.0191575	0.629938	0.0320477	0.0928655
PDACT_KE332869.1_G000350	dihydroflavonol 4-reductase-like1 LENGTH=326	1.60818	-0.43875	0.211997	0.00832925	0.465001	0.722953	0.629938	0.751069	0.857425
PDACT_KE332666.1_G002580	Protein NRT1/ PTR FAMILY 7.3	-1.8062	-0.470775	-0.00826581	0.00829405	0.477517	0.990031	0.629938	0.758923	0.996579
PDACT_KE332781.1_G001070	Auxin efflux carrier family protein LENGTH=431	1.61138	0.207221	0.123922	0.00824872	0.729021	0.835986	0.629938	0.899567	0.921885
PDACT_KE332623.1_G001790	Plant protein of unknown function (DUF641) LENGTH=425	2.34689	-0.0941553	-1.48936	0.00826084	0.91099	0.083655	0.629938	0.972289	0.244505
PDACT_KE332557.1_G003660	tolB protein-related LENGTH=652	1.17147	1.19675	2.00553	0.00844013	0.00715186	1.05675e-05	0.63636	0.0856127	0.000377471
PDACT_KE332559.1_G007040	Histone superfamily protein LENGTH=103	1.32955	0.355711	0.111723	0.00850642	0.474691	0.822287	0.637436	0.757618	0.915295
PDACT_KE334119.1_G000100	n=1 Tax=Oryza sativa subsp. japonica RepID=Q7XWB4 ORYSJ	-2.41971	-0.00171925	0.224399	0.00849622	0.996336	0.83325	0.637436	0.999627	0.921274
PDACT_KE332561.1_G002780	Ethylene-responsive transcription factor 6	-1.85887	3.21289	3.33085	0.00857814	1.57147e-05	8.62294e-06	0.640428	0.00150006	0.000323084
PDACT_KE332599.1_G001360	Peroxiredoxin-2C	0.993552	0.869919	0.976113	0.00859863	0.0211184	0.00981767	0.640428	0.158933	0.0589205
PDACT_KE332575.1_G003160	Bifunctional inhibitor/lipid-transfer protein/seed storage 2S albumin superfamily protein LENGTH=116	3.00414	7.7038	8.24051	0.00885549	8.54639e-06	3.93361e-06	0.643902	0.00096954	0.000172124
PDACT_KE335625.1_G000120	Cytochrome P450 superfamily protein LENGTH=513	-1.87287	-2.14441	-4.48969	0.00873588	0.00293139	2.00873e-08	0.643902	0.0505495	2.8452e-06
PDACT_KE332554.1_G002390	Protein FAM48A n=1 Tax=Caragana korshinskii RepID=R9R697 9FABA	-2.63407	-2.81098	-2.33726	0.00878705	0.00522682	0.0186607	0.643902	0.0713526	0.0913064
PDACT_KE332856.1_G000860	F-box/LRR-repeat protein 2	0.849213	0.727635	1.57423	0.00883195	0.0245746	1.64798e-06	0.643902	0.173438	9.09509e-05
PDACT_KE332545.1_G009710	Folate-biopterin transporter	1.61885	0.70665	1.33934	0.00873451	0.243053	0.0288566	0.643902	0.569252	0.122125
PDACT_KE332705.1_G000580	Protein disulfide-isomerase	1.19473	-0.108945	0.518584	0.00881334	0.808756	0.250418	0.643902	0.935296	0.482067
PDACT_KE332546.1_G003530	Pentatricopeptide repeat-containing protein	-1.07401	0.0655512	-0.145109	0.00879069	0.870937	0.719442	0.643902	0.958951	0.855876
PDACT_KE332591.1_G002290	U-box domain-containing protein LENGTH=400	0.940667	0.0163226	0.595236	0.00873427	0.963523	0.0961497	0.643902	0.99028	0.26589
PDACT_KE334191.1_G000190	n=1 Tax=Oryza sativa subsp. japonica RepID=Q7XLR4 ORYSJ	-1.37975	-1.90158	-1.52447	0.00890786	0.000386291	0.00404725	0.645793	0.0137783	0.0318989
PDACT_KE333579.1_G000130	unknown protein; FUNCTIONS IN: molecular function unknown; INVOLVED IN: biological process unknown; LOCATED IN: endomembrane system; Has 22 Blast hits to 22 proteins in 8 species: Archae - 0; Bacteria - 0; Metazoa - 0; Fungi - 0; Plants - 22; Viruses - 0; Other Eukaryotes - 0 (source: NCBI BLink). LENGTH=405	-2.82698	-0.396435	0.0142681	0.00896959	0.746052	0.990354	0.646444	0.907086	0.9967
PDACT_KE332553.1_G004690	Serine/threonine protein phosphatase 2A 57 kDa regulatory subunit B' epsilon isoform	1.22312	0.0112536	0.167066	0.00894643	0.980712	0.719505	0.646444	0.994758	0.855876
PDACT_KE332548.1_G007000	annexin 1 LENGTH=317	1.10275	1.31887	1.38438	0.00900318	0.00185756	0.00111372	0.646962	0.0380577	0.0125648
PDACT_KE332600.1_G000910	Desumoylating isopeptidase 1	2.66518	1.57698	2.3375	0.0090923	0.100371	0.0197524	0.650263	0.368519	0.0946815
PDACT_KE332762.1_G000490	RNA-binding protein 42	0.826438	0.177356	0.935753	0.0091022	0.573315	0.00320238	0.650263	0.818344	0.0271866
PDACT_KE332783.1_G001290	NAD(P)-linked oxidoreductase superfamily protein LENGTH=315	1.58758	-0.306027	-1.29058	0.00915449	0.607271	0.0328682	0.652097	0.836692	0.13276
PDACT_KE332554.1_G004950	GTPase Obg	1.3702	0.491734	0.896442	0.00923537	0.342971	0.0856928	0.655952	0.663784	0.248264
PDACT_KE332773.1_G000190	villin 2 LENGTH=976	-1.37797	0.129383	-0.182352	0.00942089	0.801354	0.724423	0.667195	0.931363	0.85842
PDACT_KE333588.1_G000390	Ovarian cancer-associated gene 2 protein homolog	0.979616	0.869975	0.756834	0.00951923	0.0210728	0.0446115	0.669093	0.158639	0.162309
PDACT_KE333533.1_G000150	ABC transporter A family member 2	1.4723	0.885654	-0.28944	0.00950707	0.114138	0.604774	0.669093	0.393365	0.783017
PDACT_KE332656.1_G001120	Alpha-amylase	1.61929	-0.734507	-0.057078	0.00952961	0.230619	0.925398	0.669093	0.555007	0.967652
PDACT_KE332660.1_G001650	squalene synthase 1 LENGTH=410	1.26665	-0.497047	0.673732	0.00966378	0.306689	0.16509	0.676575	0.630555	0.374724
PDACT_KE332915.1_G000760	Superoxide dismutase [Cu-Zn]	1.17087	1.90584	2.76652	0.00983138	3.3076e-05	4.67608e-09	0.682151	0.00255093	9.09853e-07
PDACT_KE332729.1_G000600	Ribosome associated membrane protein RAMP4 LENGTH=68	0.930069	1.22883	2.06887	0.00986303	0.000687954	2.31901e-08	0.682151	0.020213	3.13951e-06
PDACT_KE332933.1_G000580	Error-prone DNA polymerase	1.34862	0.679547	0.799036	0.00980856	0.18827	0.122894	0.682151	0.503052	0.311384
PDACT_KE334161.1_G000100	unknown protein; Has 1807 Blast hits to 1807 proteins in 277 species: Archae - 0; Bacteria - 0; Metazoa - 736; Fungi - 347; Plants - 385; Viruses - 0; Other Eukaryotes - 339 (source: NCBI BLink). LENGTH=348	-1.86265	-0.885555	-0.218148	0.00987988	0.207038	0.755334	0.682151	0.527189	0.876314
PDACT_KE332617.1_G001690	Aquaporin-like superfamily protein LENGTH=285	1.28315	0.42088	0.945528	0.00988261	0.390746	0.0555343	0.682151	0.700187	0.187569
PDACT_KE333218.1_G000120	tRNA 2'-phosphotransferase 1	0.938373	0.498229	0.567431	0.00991376	0.168356	0.117015	0.682379	0.477363	0.302351
PDACT_KE332552.1_G004210	Cleavage and polyadenylation specificity factor subunit 5	1.46388	-0.658838	0.143035	0.009998	0.240859	0.798213	0.686249	0.567065	0.901659
PDACT_KE332691.1_G001340	WRKY DNA-binding protein 28 LENGTH=318	-2.74713	-0.764264	-1.00194	0.0100645	0.453567	0.327512	0.688886	0.743475	0.562
PDACT_KE332584.1_G002110	Sulfhydryl oxidase n=2 Tax=Oryza sativa RepID=B9F630 ORYSJ	1.47964	0.516668	0.477965	0.010201	0.362287	0.400732	0.696279	0.680121	0.629806
PDACT_KE332585.1_G002200	splicing factor-related LENGTH=804	1.06767	1.20294	2.13457	0.0102303	0.00389095	6.09656e-07	0.696339	0.06002	4.16128e-05
PDACT_KE332793.1_G000150	RPM1-interacting protein 4 (RIN4) family protein LENGTH=89	1.69407	0.131856	0.209323	0.0102617	0.837569	0.745213	0.696542	0.946109	0.870823
PDACT_KE332555.1_G006180	Glutathione S-transferase family protein LENGTH=227	-2.18568	3.057	-2.18568	0.0103689	0.0465753	0.01129	0.698023	0.247298	0.0643957
PDACT_KE332671.1_G000700	Heat shock 70 kDa protein C	1.20132	0.867959	1.58255	0.0103637	0.0622731	0.00082487	0.698023	0.289497	0.0100516
PDACT_KE332789.1_G000880	17.6 kDa class II heat shock protein LENGTH=155	1.33891	0.724763	1.05082	0.0103577	0.160186	0.0428837	0.698023	0.466508	0.157923
PDACT_KE332548.1_G002540	Catalase-peroxidase 1	0.982216	1.98368	2.94344	0.0104153	4.71451e-07	5.89566e-13	0.698799	0.000111081	4.51461e-10
PDACT_KE332868.1_G000790	Late embryogenesis abundant protein 1	-2.58124	1.70012	6.14448	0.0104375	0.126644	9.41108e-06	0.698799	0.415555	0.000342172
PDACT_KE332687.1_G001110	Disease resistance protein (TIR-NBS-LRR class) family LENGTH=966	-3.68004	-4.01375	-3.35294	0.01047	0.00151008	0.0254404	0.699064	0.0337003	0.112141
PDACT_KE332630.1_G000650	DOF zinc finger protein 2 LENGTH=204	2.91558	1.12709	2.66216	0.0105106	0.277287	0.0178264	0.699866	0.604192	0.0882994
PDACT_KE332646.1_G001530	Peptidyl-prolyl cis-trans isomerase	0.982878	1.15078	1.44569	0.0106852	0.00289146	0.000202465	0.700937	0.0501078	0.00356526
PDACT_KE332575.1_G004610	NAD-dependent epimerase/dehydratase n=1 Tax=Leptolyngbya sp. PCC 7376 RepID=K9PVG9 9CYAN	1.05334	1.04293	1.42824	0.0106055	0.0113803	0.000592282	0.700937	0.113077	0.00796283
PDACT_KE332584.1_G003100	U-box domain-containing protein 4	-1.16888	-1.15256	-1.56149	0.0106983	0.0117852	0.000741641	0.700937	0.115375	0.00929574
PDACT_KE333706.1_G000210	UDP-N-acetylglucosamine--dolichyl-phosphate N-acetylglucosaminephosphotransferase	1.22359	0.668935	0.297592	0.0106289	0.158478	0.529487	0.700937	0.464016	0.731167
PDACT_KE332636.1_G001860	High-affinity nitrate transporter 3.2	1.08827	0.213294	-0.465754	0.0106571	0.61304	0.270828	0.700937	0.841235	0.503557
PDACT_KE332964.1_G000370	17.6 kDa class II heat shock protein LENGTH=155	4.53753	0.518208	0.471297	0.0106552	0.654513	0.677007	0.700937	0.863492	0.829801
PDACT_KE332890.1_G000610	tubulin beta chain 2 LENGTH=450	-1.8491	1.8977	0.528352	0.0108446	0.00908405	0.454751	0.70863	0.0987138	0.675061
PDACT_KE332621.1_G002460	UDP-Glycosyltransferase superfamily protein LENGTH=480	2.03997	3.32199	1.79248	0.0110903	8.66354e-05	0.0242879	0.717161	0.00495175	0.108644
PDACT_KE333074.1_G000530	protein n=3 Tax=Oryza RepID=Q0E0T0 ORYSJ	1.4134	1.70145	2.62452	0.0110922	0.00240455	5.83612e-06	0.717161	0.0448409	0.000234056
PDACT_KE332749.1_G000780	Hsp70 nucleotide exchange factor FES1	0.766496	0.215075	0.198582	0.0110632	0.473787	0.508568	0.717161	0.756906	0.715946
PDACT_KE332602.1_G003820	laccase 10 LENGTH=558	-2.27391	-0.513962	-3.14995	0.0110464	0.551438	0.000634518	0.717161	0.805619	0.00837277
PDACT_KE332799.1_G001330	subtilisin-like serine protease 2 LENGTH=764	2.73624	3.14208	2.81784	0.0111321	0.00427684	0.0092813	0.717848	0.0631323	0.0566052
PDACT_KE332548.1_G005540	early nodulin-like protein 17 LENGTH=172	1.95576	1.45501	1.32483	0.0111688	0.0544588	0.0795098	0.718323	0.269965	0.236732
PDACT_KE334455.1_G000110	BAX inhibitor 1 LENGTH=247	1.28703	1.26589	1.24529	0.0114083	0.0127642	0.0142803	0.729895	0.12053	0.0759782
PDACT_KE332560.1_G005310	RING/FYVE/PHD zinc finger superfamily protein LENGTH=601	-2.12973	-0.449309	-1.06614	0.011379	0.582828	0.196773	0.729895	0.823831	0.416815
PDACT_KE333702.1_G000150	sterol methyltransferase 1 LENGTH=336	-2.82595	-2.91974	-5.18311	0.0115468	0.00923211	2.44331e-05	0.736832	0.0997019	0.000717875
PDACT_KE333152.1_G000210	unknown protein; FUNCTIONS IN: molecular function unknown; INVOLVED IN: N-terminal protein myristoylation, anaerobic respiration; LOCATED IN: cellular component unknown; EXPRESSED IN: leaf apex, inflorescence meristem, hypocotyl, root, flower; EXPRESSED DURING: petal differentiation and expansion stage; Has 47 Blast hits to 47 proteins in 13 species: Archae - 0; Bacteria - 0; Metazoa - 0; Fungi -…	2.26399	1.55973	2.51479	0.0116284	0.0746449	0.00556999	0.73819	0.317276	0.0397926
PDACT_KE332592.1_G002820	plastid developmental protein DAG, putative LENGTH=229	-0.772083	-0.111137	0.210402	0.0115996	0.714601	0.488895	0.73819	0.893142	0.700029
PDACT_KE332704.1_G001440	Protein of unknown function (DUF3511) LENGTH=87	1.92115	2.44949	1.81548	0.0120027	0.00168826	0.0172502	0.742205	0.0362442	0.0864238
PDACT_KE332768.1_G000500	Desumoylating isopeptidase 1	1.21322	1.34515	1.43592	0.0119538	0.00543541	0.00308103	0.742205	0.0725432	0.026509
PDACT_KE332657.1_G000100	Terpenoid cyclases/Protein prenyltransferases superfamily protein LENGTH=598	-3.33234	-3.30971	-4.94066	0.0119297	0.0122139	0.000308041	0.742205	0.117738	0.00487612
PDACT_KE332927.1_G000890	Bifunctional 3'-phosphoadenosine 5'-phosphosulfate synthase 2	-1.12802	-0.987447	-1.58716	0.011981	0.0272529	0.000477181	0.742205	0.18509	0.0067174
PDACT_KE332745.1_G001420	Protein of unknown function (DUF3527) LENGTH=839	1.72469	1.36489	2.03941	0.011902	0.0432486	0.00321853	0.742205	0.238417	0.0272801
PDACT_KE332618.1_G002390	Tetratricopeptide repeat protein 28	1.09515	0.862774	1.48637	0.0117967	0.046302	0.000708382	0.742205	0.246756	0.00900334
PDACT_KE332650.1_G000500	purple acid phosphatase 15 LENGTH=532	2.85182	1.55931	0.576219	0.0120248	0.140332	0.565934	0.742205	0.436627	0.756225
PDACT_KE333961.1_G000170	cyclin-dependent kinase E;1 LENGTH=470	-1.09269	-0.539568	-0.796201	0.0120074	0.208799	0.0655097	0.742205	0.528665	0.208745
PDACT_KE332892.1_G000350	Zinc finger HIT domain-containing protein 2	1.2838	0.278042	1.35289	0.0118836	0.58083	0.00812328	0.742205	0.822935	0.0517962
PDACT_KE332752.1_G001150	Tetratricopeptide repeat (TPR)-like superfamily protein LENGTH=277	1.06919	0.0994027	-0.0824626	0.0120004	0.813391	0.844811	0.742205	0.937483	0.926349
PDACT_KE332715.1_G001190	Digalactosyldiacylglycerol synthase 1, chloroplastic	1.36325	0.0444503	0.23352	0.0119799	0.933532	0.661463	0.742205	0.980411	0.820187
PDACT_KE332587.1_G004040	GATA transcription factor 23 LENGTH=120	2.26548	3.36073	3.35543	0.0121133	0.000457351	0.00046683	0.745204	0.0153941	0.00660462
PDACT_KE332549.1_G002440	Elicitor-responsive protein 3	-1.26823	-1.69403	-1.64493	0.0121681	0.000934582	0.00133904	0.745204	0.0242743	0.0144154
PDACT_KE334570.1_G000150	Elicitor-responsive protein 3	-1.26823	-1.69403	-1.64493	0.0121725	0.00093515	0.00133981	0.745204	0.0242743	0.0144154
PDACT_KE332690.1_G001810	Unknown protein	0.889131	-1.11965	-1.16836	0.0122254	0.00169338	0.00106919	0.745204	0.0362714	0.0121858
PDACT_KE332969.1_G000330	cycloartenol synthase 1 LENGTH=759	-1.27633	-1.52483	-1.63239	0.0122241	0.0029268	0.00157214	0.745204	0.0505414	0.0162395
PDACT_KE332681.1_G001070	cold-regulated 413-plasma membrane 2 LENGTH=203	1.4843	2.55388	3.11244	0.0123172	3.2035e-05	7.36602e-07	0.748934	0.00250794	4.71271e-05
PDACT_KE332574.1_G003530	Aquaporin-like superfamily protein LENGTH=285	1.71698	0.889951	0.866483	0.0123485	0.185837	0.197552	0.748978	0.500709	0.418064
PDACT_KE333145.1_G000430	Dynamin related protein 5A LENGTH=817	-3.66654	-2.86887	-3.30633	0.0125148	0.119922	0.0577761	0.757193	0.404177	0.192776
PDACT_KE332909.1_G000440	RNA binding LENGTH=901	-0.858046	0.24505	-0.246223	0.0125511	0.472815	0.470787	0.757518	0.756416	0.686922
PDACT_KE332555.1_G002110	Superoxide dismutase [Cu-Zn]	-1.21787	-0.804443	0.79866	0.0127208	0.0970872	0.0994112	0.758852	0.36238	0.271629
PDACT_KE332598.1_G001770	Aldose reductase	-3.10973	0.772077	-1.70588	0.012687	0.530771	0.164601	0.758852	0.791967	0.373856
PDACT_KE332687.1_G001890	Pectinacetylesterase family protein LENGTH=397	-2.07288	0.448151	0.569025	0.0126883	0.576238	0.478548	0.758852	0.819985	0.692435
PDACT_KE332809.1_G001130	CASP-like protein	1.1607	0.0973942	0.461403	0.0127281	0.833132	0.31925	0.758852	0.944717	0.553285
PDACT_KE334538.1_G000150	Disease resistance protein	4.77104	-0.102206	-0.251041	0.0127055	0.917785	0.735199	0.758852	0.974368	0.865182
PDACT_KE332911.1_G000390	Urease subunit alpha	0.877663	1.07971	0.625063	0.0127694	0.0022382	0.0757424	0.759471	0.042881	0.229418
PDACT_KE332589.1_G001410	Protein NRT1/ PTR FAMILY 8.3	-0.893279	-0.512662	0.172452	0.0128387	0.150451	0.627638	0.761741	0.45224	0.798817
PDACT_KE332653.1_G001730	purine permease 1 LENGTH=356	-1.40628	-1.46478	-3.60563	0.0129497	0.00966852	7.36946e-09	0.76306	0.103002	1.29915e-06
PDACT_KE332584.1_G001430	unknown protein; Has 1807 Blast hits to 1807 proteins in 277 species: Archae - 0; Bacteria - 0; Metazoa - 736; Fungi - 347; Plants - 385; Viruses - 0; Other Eukaryotes - 339 (source: NCBI BLink). LENGTH=302	2.37596	2.3409	2.67194	0.0129543	0.0142493	0.00599873	0.76306	0.128181	0.041986
PDACT_KE332567.1_G002830	GHMP kinase family protein LENGTH=366	1.43495	1.01048	1.22126	0.0129364	0.0772358	0.0335443	0.76306	0.322127	0.134718
PDACT_KE332925.1_G000340	Nuclear transcription factor Y subunit C-2	1.70634	0.27958	0.699086	0.0130903	0.676525	0.298937	0.769222	0.875674	0.533203
PDACT_KE332603.1_G000470	Transducin/WD40 repeat-like superfamily protein LENGTH=1264	-1.71043	-1.15617	-1.52431	0.0132381	0.0884268	0.0272607	0.776047	0.344869	0.117645
PDACT_KE338643.1_G000100	UPI0003D715A2 related cluster n=1 Tax=unknown RepID=UPI0003D715A2	-1.25365	-1.495	-1.44511	0.0134907	0.00340948	0.00464575	0.777828	0.0553283	0.0350599
PDACT_KE332762.1_G000970	diacylglycerol acyltransferase family LENGTH=314	1.0569	0.676447	1.34479	0.0134754	0.111497	0.00178018	0.777828	0.389061	0.0177547
PDACT_KE332752.1_G000920	T-complex protein 1 subunit beta	0.850508	0.447986	0.328629	0.0134326	0.19063	0.3367	0.777828	0.506364	0.570503
PDACT_KE334502.1_G000140	Terpenoid cyclases/Protein prenyltransferases superfamily protein LENGTH=802	-2.17443	-1.02286	-2.07255	0.0134448	0.231424	0.0180469	0.777828	0.556126	0.0890375
PDACT_KE332563.1_G002030	Pentatricopeptide repeat-containing protein	-1.02554	0.335347	0.212602	0.0134196	0.4132	0.603843	0.777828	0.716443	0.782179
PDACT_KE332716.1_G002160	Retinoblastoma-binding protein n=1 Tax=Medicago truncatula RepID=G7JHR9 MEDTR	-1.63326	-0.492845	-0.392617	0.0133844	0.444116	0.542831	0.777828	0.736859	0.74083
PDACT_KE332551.1_G005910	11S globulin seed storage protein 2	-4.06896	1.62682	-0.380146	0.013355	0.482629	0.862461	0.777828	0.761853	0.93541
PDACT_KE332559.1_G003240	Diphthamide biosynthesis protein 3	1.09298	-0.261019	-0.489267	0.0135254	0.551917	0.266567	0.777999	0.805835	0.49931
PDACT_KE332690.1_G001740	laccase 11 LENGTH=557	-3.56232	-2.39402	-3.24305	0.01366	0.0944979	0.0251514	0.783897	0.357566	0.111287
PDACT_KE332768.1_G000240	unknown protein; BEST Arabidopsis thaliana protein match is: unknown protein . LENGTH=416	1.35083	1.01147	1.50664	0.0137956	0.0631898	0.00623121	0.787991	0.292089	0.0429506
PDACT_KE333207.1_G000200	Late embryogenesis abundant protein LENGTH=151	1.13416	0.771028	0.968871	0.0137902	0.0919662	0.0348356	0.787991	0.352556	0.13779
PDACT_KE332836.1_G000180	Exostosin-like 2	1.04761	1.09582	1.19652	0.0138639	0.0100239	0.00504884	0.79005	0.105148	0.0371857
PDACT_KE332856.1_G000910	F-box/RNI-like superfamily protein LENGTH=360	0.911288	1.05494	1.9637	0.0140797	0.00454807	2.45395e-07	0.794639	0.0655904	1.99773e-05
PDACT_KE334179.1_G000140	UPI0003DEAE65 related cluster n=1 Tax=unknown RepID=UPI0003DEAE65	2.74089	3.84647	4.09298	0.0143012	0.00521886	0.00420591	0.794639	0.0712837	0.0327802
PDACT_KE333116.1_G000590	Cysteine desulfuration protein SufE	1.6036	1.35431	-0.783937	0.0141693	0.0369126	0.226537	0.794639	0.218269	0.45418
PDACT_KE332613.1_G000110	E3 ubiquitin-protein ligase UHRF1	-3.71685	-2.16525	-4.03225	0.0142872	0.155171	0.00739845	0.794639	0.459604	0.0483316
PDACT_KE332794.1_G000610	alpha/beta-Hydrolases superfamily protein LENGTH=314	0.920496	0.356202	-0.143066	0.0141376	0.339808	0.702512	0.794639	0.661528	0.844793
PDACT_KE332573.1_G003310	cyclin-dependent kinase E;1 LENGTH=470	-1.09615	-0.313204	-0.0716066	0.0140221	0.476514	0.870685	0.794639	0.758554	0.939755
PDACT_KE332603.1_G000660	beta glucosidase 11 LENGTH=521	1.51861	0.402702	1.00226	0.0142869	0.507321	0.10171	0.794639	0.777814	0.27587
PDACT_KE332721.1_G000110	AP2/B3 transcription factor family protein LENGTH=337	2.46909	-0.271345	1.69298	0.0141379	0.758337	0.0803869	0.794639	0.913323	0.238359
PDACT_KE332561.1_G003710	Cytochrome c biogenesis orf452 n=1 Tax=Arabidopsis thaliana RepID=Q56XW3 ARATH	-1.90658	0.227397	0.00194281	0.0141009	0.765687	0.997595	0.794639	0.916494	0.999498
PDACT_KE332712.1_G001320	Auxin-responsive family protein LENGTH=393	0.718511	-0.0191716	-0.64033	0.0142542	0.947625	0.0290856	0.794639	0.984508	0.122691
PDACT_KE332740.1_G001600	Histone H1.2	0.874314	0.0111724	0.300482	0.0142007	0.974854	0.397155	0.794639	0.993216	0.626207
PDACT_KE333199.1_G000240	cyclin p4;1 LENGTH=202	-1.6513	-0.937853	-3.13164	0.0143411	0.157104	1.2174e-05	0.795057	0.462384	0.000416994
PDACT_KE333277.1_G000120	Protein of unknown function (DUF810) LENGTH=1117	0.841018	0.623763	0.763226	0.0144317	0.0688754	0.026369	0.795911	0.305145	0.115042
PDACT_KE332927.1_G001020	Argonaute family protein LENGTH=997	1.13536	0.296137	1.40845	0.014454	0.520951	0.00254758	0.795911	0.78592	0.0231207
PDACT_KE332663.1_G000190	Pectate lyase family protein LENGTH=408	-2.77532	0.334814	-4.71139	0.0144501	0.757645	7.75555e-05	0.795911	0.912833	0.00172608
PDACT_KE333150.1_G000230	2-oxoglutarate (2OG) and Fe(II)-dependent oxygenase superfamily protein LENGTH=348	-2.82175	-0.811201	0.481894	0.014625	0.490769	0.689468	0.803521	0.767023	0.837304
PDACT_KE332758.1_G000770	Esterase-6	1.47154	0.930061	1.65145	0.0146913	0.118896	0.00643032	0.803563	0.402797	0.0439151
PDACT_KE332549.1_G003540	RING/U-box superfamily protein LENGTH=260	0.769019	-0.380579	-0.168305	0.0146913	0.225905	0.591951	0.803563	0.550531	0.774849
PDACT_KE332554.1_G005380	Transcription factor IWS1	0.870569	0.65811	0.198402	0.0148078	0.064594	0.577915	0.806357	0.295279	0.764241
PDACT_KE332641.1_G000660	myb domain protein 17 LENGTH=299	1.3858	0.982358	0.0501575	0.0148082	0.0816719	0.928699	0.806357	0.33123	0.969325
PDACT_KE332631.1_G002140	Transcription initiation factor TFIID subunit 6	-1.44524	-1.41065	-1.49502	0.0149662	0.0173246	0.0122694	0.809564	0.142028	0.0681897
PDACT_KE333619.1_G000290	Heat stress transcription factor A-1	2.41716	1.88276	1.38716	0.0149411	0.0517675	0.14436	0.809564	0.261827	0.34491
PDACT_KE332567.1_G001290	unknown protein; BEST Arabidopsis thaliana protein match is: unknown protein . LENGTH=154	-1.98998	-0.855752	-2.8778	0.0149093	0.281364	0.000671024	0.809564	0.607948	0.00869988
PDACT_KE332686.1_G001040	PITH domain-containing protein 1	0.743179	1.18364	1.46076	0.0150155	0.000116797	2.30643e-06	0.810442	0.0061948	0.000115813
PDACT_KE332836.1_G000200	Exostosin-2	1.19306	1.2016	1.90822	0.0151771	0.0142742	0.000125473	0.817363	0.128181	0.00249253
PDACT_KE332852.1_G001110	Glutathione S-transferase family protein LENGTH=219	0.950826	1.69915	1.77279	0.015311	2.0777e-05	9.39276e-06	0.818977	0.0018581	0.000342172
PDACT_KE333523.1_G000100	Unknown protein	-1.13143	-1.38828	-1.29943	0.0156411	0.00319815	0.00579918	0.818977	0.0532388	0.0409992
PDACT_KE332848.1_G000810	Protein disulfide isomerase-like 2-3	1.03518	0.882587	1.24029	0.0155535	0.038574	0.00389705	0.818977	0.224038	0.031075
PDACT_KE332572.1_G000990	Ethylene-responsive transcription factor 1	1.60688	-1.22428	-2.06075	0.0156714	0.063172	0.00230403	0.818977	0.292089	0.0215488
PDACT_KE332592.1_G003520	PLANT CADMIUM RESISTANCE 2 LENGTH=152	-2.68088	-1.56609	-0.966015	0.0155751	0.144084	0.363189	0.818977	0.44299	0.595289
PDACT_KE332632.1_G001960	Vacuolar protein-sorting-associated protein 37 homolog 1	0.931019	0.540741	0.728366	0.0156849	0.158397	0.0581488	0.818977	0.463977	0.193597
PDACT_KE332615.1_G001920	ureide permease 2 LENGTH=398	-1.93268	-1.04077	-2.20904	0.0153441	0.181287	0.00616266	0.818977	0.494188	0.04261
PDACT_KE333265.1_G000270	Transmembrane amino acid transporter family protein LENGTH=550	1.63475	-0.838818	1.18236	0.0156932	0.207192	0.0770716	0.818977	0.527193	0.231953
PDACT_KE333130.1_G000160	5'-AMP-activated protein kinase beta-2 subunit protein LENGTH=320	1.71868	-0.812465	1.32268	0.0154849	0.242704	0.0596675	0.818977	0.569085	0.196823
PDACT_KE332613.1_G001910	Zinc finger protein CONSTANS-LIKE 14	1.86002	0.691869	0.491766	0.0157084	0.355371	0.510723	0.818977	0.674516	0.717363
PDACT_KE332879.1_G000520	RING finger protein 141	0.692776	0.144903	0.685501	0.0156779	0.612197	0.0168374	0.818977	0.840737	0.0849113
PDACT_KE333562.1_G000180	protein n=1 Tax=Oryza sativa subsp. japonica RepID=Q0JP28 ORYSJ	1.44599	0.268907	-0.211762	0.0155602	0.64842	0.722674	0.818977	0.860626	0.857359
PDACT_KE333375.1_G000420	pyruvate decarboxylase-2 LENGTH=607	1.02121	0.164969	-0.183014	0.0153995	0.692715	0.661349	0.818977	0.883479	0.820172
PDACT_KE333765.1_G000120	n=1 Tax=Oryza sativa subsp. japonica RepID=Q7XMT3 ORYSJ	-1.91866	-0.323937	1.21384	0.0152733	0.781729	0.357941	0.818977	0.923406	0.590361
PDACT_KE332859.1_G000450	YGGT family protein LENGTH=218	-7.07428	-0.0947053	-7.19561	0.0155283	0.967633	0.0140397	0.818977	0.991506	0.0750499
PDACT_KE332547.1_G000440	alpha carbonic anhydrase 1 LENGTH=284	-1.77529	0.455406	1.06391	0.0157979	0.525211	0.143475	0.821895	0.788878	0.343532
PDACT_KE332916.1_G000550	Histone H2B.1	1.37822	-2.01456	-2.27992	0.0158735	0.000568712	0.000116115	0.822334	0.0177868	0.00235538
PDACT_KE332939.1_G000230	Histone superfamily protein LENGTH=103	0.985502	-0.652929	-0.43357	0.0158671	0.109441	0.286933	0.822334	0.385308	0.521394
PDACT_KE332670.1_G001230	Vacuolar protein sorting-associated protein 35	-2.13205	-3.93492	-4.55054	0.015977	3.43182e-05	3.59422e-06	0.824626	0.00259358	0.000161898
PDACT_KE332682.1_G002090	FASCICLIN-like arabinogalactan 1 LENGTH=424	-2.51467	1.67719	-0.378484	0.015985	0.100732	0.703253	0.824626	0.369324	0.845237
PDACT_KE332773.1_G000610	unknown protein; FUNCTIONS IN: molecular function unknown; INVOLVED IN: biological process unknown; LOCATED IN: chloroplast; EXPRESSED IN: 22 plant structures; EXPRESSED DURING: 13 growth stages; Has 1807 Blast hits to 1807 proteins in 277 species: Archae - 0; Bacteria - 0; Metazoa - 736; Fungi - 347; Plants - 385; Viruses - 0; Other Eukaryotes - 339 (source: NCBI BLink). LENGTH=341	2.04353	1.60909	0.0751447	0.0161229	0.0546902	0.926488	0.829988	0.270351	0.968327
PDACT_KE333368.1_G000220	Heavy metal transport/detoxification superfamily protein LENGTH=177	1.07023	1.30767	1.67188	0.0162675	0.00348242	0.000216696	0.830384	0.0561808	0.00376324
PDACT_KE333746.1_G000200	unknown protein; Has 35333 Blast hits to 34131 proteins in 2444 species: Archae - 798; Bacteria - 22429; Metazoa - 974; Fungi - 991; Plants - 531; Viruses - 0; Other Eukaryotes - 9610 (source: NCBI BLink). LENGTH=173	0.979211	0.993882	1.2932	0.016275	0.0146996	0.00161014	0.830384	0.130224	0.0164805
PDACT_KE332787.1_G000720	histone H1-3 LENGTH=167	0.897851	0.474538	0.477394	0.0163	0.201954	0.199612	0.830384	0.520716	0.420591
PDACT_KE332569.1_G002900	Late embryogenesis abundant (LEA) hydroxyproline-rich glycoprotein family LENGTH=206	-2.70459	-1.60434	-2.70459	0.0162168	0.292136	0.0172861	0.830384	0.616952	0.0865482
PDACT_KE332597.1_G003840	Glutaredoxin family protein LENGTH=273	-1.73041	-0.654601	-0.279956	0.0161927	0.348937	0.689097	0.830384	0.668405	0.837042
PDACT_KE332590.1_G002150	Histone H2B	0.90481	-1.42398	-1.07745	0.0163959	0.000193416	0.00448608	0.831814	0.00875886	0.0342238
PDACT_KE332557.1_G002080	Kelch domain-containing protein 3	-2.68585	2.32676	0.0232089	0.0163808	0.0837277	0.983633	0.831814	0.334856	0.993281
PDACT_KE333046.1_G000390	Structure-specific endonuclease subunit SLX1	1.02832	0.779277	1.0928	0.0164402	0.0677728	0.0108792	0.83212	0.302827	0.0629926
PDACT_KE332569.1_G005100	V-type proton ATPase 16 kDa proteolipid subunit	0.72523	-0.245759	-0.577385	0.0164699	0.415247	0.0567521	0.83212	0.717773	0.190344
PDACT_KE332617.1_G001590	Protein disulfide isomerase-like 1-4	1.12784	1.91233	2.6385	0.0166515	7.01612e-05	9.23281e-08	0.836125	0.00425015	9.19678e-06
PDACT_KE332626.1_G001140	CYCLIN D1;1 LENGTH=339	2.5909	4.42773	2.63953	0.016634	0.00028162	0.0148777	0.836125	0.0112026	0.0781285
PDACT_KE332548.1_G003920	Trihelix transcription factor GT-3b	1.47918	1.7977	0.747787	0.0166228	0.0038225	0.223198	0.836125	0.0592451	0.44933
PDACT_KE333722.1_G000170	Hydroxyacylglutathione hydrolase	-1.3331	-1.32083	-2.72663	0.0166936	0.0175765	3.28865e-06	0.836525	0.143135	0.000151191
PDACT_KE332545.1_G004770	Late embryogenesis abundant (LEA) hydroxyproline-rich glycoprotein family LENGTH=221	-3.36542	-2.45987	-3.52565	0.0167826	0.0862096	0.011785	0.838011	0.340174	0.066254
PDACT_KE333057.1_G000530	Eukaryotic aspartyl protease family protein LENGTH=433	3.69359	-0.804361	-2.65669	0.0167917	0.507119	0.00438126	0.838011	0.777814	0.0336657
PDACT_KE332712.1_G001020	RING-H2 finger protein 2B LENGTH=147	0.854632	0.291779	0.537992	0.01683	0.411603	0.130836	0.838215	0.715398	0.32446
PDACT_KE333057.1_G000360	SNARE associated Golgi protein family LENGTH=274	0.870217	0.737056	0.57025	0.0169646	0.0428061	0.116823	0.843208	0.237022	0.302124
PDACT_KE332562.1_G000480	unknown protein; BEST Arabidopsis thaliana protein match is: unknown protein . LENGTH=195	1.56927	2.90748	3.82524	0.017281	2.35964e-05	9.12242e-08	0.848664	0.00201519	9.12391e-06
PDACT_KE333063.1_G000460	unknown protein; BEST Arabidopsis thaliana protein match is: unknown protein . LENGTH=567	-1.62972	2.03857	2.79667	0.017144	0.00588245	0.000257099	0.848664	0.0760652	0.00429467
PDACT_KE332754.1_G000140	NAD(P)-binding Rossmann-fold superfamily protein LENGTH=368	1.09363	-1.05003	-1.1186	0.0172061	0.0229756	0.0161022	0.848664	0.166776	0.0823733
PDACT_KE334853.1_G000160	Cysteine-rich receptor-like protein kinase 10	1.63805	1.27714	-0.144008	0.0172822	0.0608857	0.831127	0.848664	0.286361	0.92012
PDACT_KE332983.1_G000980	sulfate transporter 3;1 LENGTH=658	1.03423	0.471082	0.909967	0.0171622	0.273771	0.0355962	0.848664	0.600563	0.139716
PDACT_KE334201.1_G000120	Epimerase family protein SDR39U1	-0.885881	-0.303585	-0.786262	0.0172361	0.41007	0.0343902	0.848664	0.714423	0.13669
PDACT_KE333066.1_G000290	Cytochrome P450 superfamily protein LENGTH=513	-1.27441	-2.23721	-1.94083	0.0174811	5.20952e-05	0.000398666	0.855004	0.00355583	0.00589199
PDACT_KE333028.1_G000370	4-alpha-glucanotransferase	1.33149	0.757588	1.2121	0.017477	0.172258	0.0302941	0.855004	0.482855	0.125946
PDACT_KE332735.1_G000110	T-complex protein 1 subunit gamma	1.00263	0.394437	0.0589158	0.0175889	0.346406	0.888047	0.858562	0.6671	0.94789
PDACT_KE333285.1_G000350	histone H2A 2 LENGTH=131	0.866317	-0.677272	-0.438167	0.0176524	0.0630862	0.228022	0.859951	0.292003	0.455814
PDACT_KE332673.1_G001830	zinc induced facilitator-like 1 LENGTH=478	1.95391	0.407216	2.26378	0.0177311	0.599098	0.00685522	0.862067	0.832826	0.0459966
PDACT_KE332578.1_G003490	Splicing factor U2af large subunit B	0.682383	0.758702	0.941963	0.0177798	0.00843528	0.00111255	0.862725	0.0946853	0.0125617
PDACT_KE332584.1_G002990	calcium-transporting ATPase, putative LENGTH=1049	-0.607324	-1.24336	-1.89035	0.0182077	1.77469e-06	1.07503e-12	0.862994	0.00029583	7.25065e-10
PDACT_KE332548.1_G002200	Phosphatidylinositol transfer protein 1	1.72055	2.99359	3.66173	0.0183896	8.82461e-05	3.33225e-06	0.862994	0.00500551	0.000152336
PDACT_KE332883.1_G000250	Protein of unknown function (DUF1218) LENGTH=173	0.952693	1.36785	1.18347	0.0182793	0.00075823	0.00349499	0.862994	0.0215182	0.0289524
PDACT_KE333154.1_G000310	Late embryogenesis abundant protein Lea5	1.71072	2.15981	1.34054	0.0183393	0.00334875	0.0619564	0.862994	0.0547648	0.201297
PDACT_KE333766.1_G000210	UPI0003D715A2 related cluster n=1 Tax=unknown RepID=UPI0003D715A2	1.69615	1.7843	1.8487	0.0184535	0.0133975	0.010716	0.862994	0.123978	0.0624757
PDACT_KE332551.1_G007600	unknown protein; FUNCTIONS IN: molecular function unknown; INVOLVED IN: biological process unknown; LOCATED IN: plasma membrane; EXPRESSED IN: 24 plant structures; EXPRESSED DURING: 14 growth stages; BEST Arabidopsis thaliana protein match is: unknown protein . LENGTH=164	1.16282	1.15588	1.64576	0.0185014	0.0189788	0.000953054	0.862994	0.148913	0.0112062
PDACT_KE332728.1_G000600	ATP binding cassette subfamily B1 LENGTH=1286	0.846401	-0.797589	0.411354	0.0179702	0.0259473	0.247887	0.862994	0.179913	0.478964
PDACT_KE332885.1_G000330	serine carboxypeptidase-like 33 LENGTH=478	4.85352	3.6523	0.261551	0.0183094	0.0459462	0.780367	0.862994	0.245769	0.891473
PDACT_KE333271.1_G000440	Basic-leucine zipper (bZIP) transcription factor family protein LENGTH=249	0.725754	0.599573	0.654931	0.0185249	0.051316	0.0334825	0.862994	0.260174	0.134545
PDACT_KE332591.1_G000220	formin homology 1 LENGTH=1051	-1.6239	-1.3085	-2.38885	0.0179811	0.0543719	0.000711802	0.862994	0.269921	0.00901395
PDACT_KE332726.1_G000990	Solute carrier family 2, facilitated glucose transporter member 8	-2.08443	-1.43021	-3.08456	0.0182632	0.0984105	0.000792389	0.862994	0.364543	0.00975542
PDACT_KE332607.1_G003630	Lipid A export ATP-binding/permease protein MsbA	-2.88069	-1.89494	-4.11803	0.0183581	0.107912	0.00139064	0.862994	0.3826	0.0148093
PDACT_KE332869.1_G000630	unknown protein; BEST Arabidopsis thaliana protein match is: unknown protein . LENGTH=156	0.92256	0.590304	0.694425	0.0180066	0.128473	0.074287	0.862994	0.418299	0.227115
PDACT_KE332547.1_G000870	TRICHOME BIREFRINGENCE-LIKE 36 LENGTH=379	3.63659	-0.323376	-0.323376	0.0183026	0.286754	0.309161	0.862994	0.612699	0.543605
PDACT_KE332772.1_G000660	RING/U-box superfamily protein LENGTH=204	0.960957	0.367931	0.633293	0.0178793	0.361304	0.117195	0.862994	0.679294	0.302638
PDACT_KE332566.1_G003520	SCARECROW-like 8 LENGTH=640	1.1653	-0.392932	0.400386	0.0185015	0.423007	0.414037	0.862994	0.72187	0.641637
PDACT_KE332602.1_G001420	proteasome inhibitor-related LENGTH=302	0.830519	0.26902	0.411714	0.0184739	0.442822	0.240757	0.862994	0.736353	0.471169
PDACT_KE332570.1_G000480	Disease resistance protein	-1.0578	0.300095	0.492824	0.0179928	0.495156	0.263103	0.862994	0.770123	0.495319
PDACT_KE332661.1_G000540	Synaptotagmin-5	1.00723	-0.16017	0.265129	0.018034	0.704297	0.530027	0.862994	0.888584	0.731582
PDACT_KE333031.1_G000620	RING/U-box superfamily protein LENGTH=166	1.11758	0.0810608	-0.0241487	0.0179046	0.862614	0.958971	0.862994	0.956621	0.982725
PDACT_KE332604.1_G000400	protein n=1 Tax=Oryza sativa subsp. japonica RepID=C7J7N6 ORYSJ	-2.63005	0.0481745	0.178491	0.0180984	0.96745	0.880832	0.862994	0.991367	0.943847
PDACT_KE332692.1_G001080	kinesin-like protein 1 LENGTH=1087	1.15889	1.76383	1.41294	0.0186867	0.000409623	0.00435511	0.863807	0.0143219	0.0335949
PDACT_KE332951.1_G000510	Chaperone protein htpG family protein LENGTH=823	1.17745	1.29735	1.43343	0.0186909	0.00975823	0.00443489	0.863807	0.103569	0.0339495
PDACT_KE332735.1_G000400	ubiquitin-conjugating enzyme 37 LENGTH=409	-2.39699	-2.34827	-2.34861	0.0186442	0.020218	0.0218277	0.863807	0.154519	0.101454
PDACT_KE332908.1_G000670	non-specific phospholipase C6 LENGTH=520	-1.48566	-0.504189	-1.0535	0.0187186	0.412982	0.0917416	0.863807	0.716443	0.258692
PDACT_KE332742.1_G000560	Pathogenesis-related thaumatin superfamily protein LENGTH=316	-3.55466	-0.697673	0.0610972	0.0186325	0.612881	0.96451	0.863807	0.841146	0.984839
PDACT_KE332582.1_G001830	Hydroxymethylglutaryl-CoA lyase	0.70485	-0.446968	-0.469874	0.0187837	0.135796	0.11738	0.865179	0.430304	0.302798
PDACT_KE332571.1_G000520	Catalytic, putative n=1 Tax=Ricinus communis RepID=B9SZE8 RICCO	2.33783	-2.90392	-1.85777	0.0189311	0.00167133	0.0482265	0.865323	0.0361083	0.170624
PDACT_KE333309.1_G000250	Arabidopsis thaliana protein of unknown function (DUF821) LENGTH=539	0.951138	0.788425	1.31842	0.0188483	0.0509824	0.00123331	0.865323	0.259347	0.0135825
PDACT_KE333201.1_G000230	Vacuolar protein sorting-associated protein n=1 Tax=Medicago truncatula RepID=G7IJW3 MEDTR	-1.13452	-0.532513	-1.01252	0.0189634	0.265326	0.0357936	0.865323	0.592027	0.140132
PDACT_KE332981.1_G000690	Alcohol dehydrogenase	1.50016	-0.381087	0.311536	0.0189201	0.543337	0.619038	0.865323	0.800282	0.792979
PDACT_KE333169.1_G000310	HAT family dimerisation domain containing protein, expressed n=1 Tax=Oryza sativa subsp. japonica RepID=Q8S6T7 ORYSJ	-1.73319	-0.133375	0.111688	0.0189047	0.852384	0.876892	0.865323	0.95281	0.942381
PDACT_KE333457.1_G000110	Unknown protein	-0.846425	-0.53182	-0.709727	0.0190523	0.138418	0.048849	0.867763	0.433921	0.172279
PDACT_KE332623.1_G001660	protein kinase family protein LENGTH=831	0.99713	0.561888	1.0396	0.0192401	0.18429	0.0147524	0.869852	0.498959	0.0776568
PDACT_KE332785.1_G001710	unknown protein; FUNCTIONS IN: molecular function unknown; INVOLVED IN: biological process unknown; LOCATED IN: nucleus; EXPRESSED IN: 20 plant structures; EXPRESSED DURING: 13 growth stages; Has 32 Blast hits to 32 proteins in 12 species: Archae - 0; Bacteria - 0; Metazoa - 0; Fungi - 0; Plants - 32; Viruses - 0; Other Eukaryotes - 0 (source: NCBI BLink). LENGTH=192	0.791654	0.375685	0.862701	0.0191566	0.264199	0.0107856	0.869852	0.590865	0.0626877
PDACT_KE332743.1_G000430	inositol transporter 2 LENGTH=580	2.64333	0.874086	0.0589805	0.0192274	0.412592	0.95543	0.869852	0.71632	0.98109
PDACT_KE334738.1_G000230	Bifunctional pinoresinol-lariciresinol reductase	-1.78572	0.444859	1.8237	0.0192027	0.549513	0.0179362	0.869852	0.804356	0.0886107
PDACT_KE332613.1_G000730	unknown protein; BEST Arabidopsis thaliana protein match is: unknown protein . LENGTH=158	1.49691	1.54549	1.25572	0.0194129	0.0157984	0.048934	0.871234	0.135548	0.172505
PDACT_KE332738.1_G000740	Uncharacterised protein family (UPF0497) LENGTH=283	0.831059	0.750734	1.88465	0.0193902	0.0343676	2.1187e-07	0.871234	0.209697	1.79789e-05
PDACT_KE332848.1_G000270	Lysine-specific demethylase 3B	-0.655309	-0.246196	0.0580319	0.0193269	0.376785	0.834809	0.871234	0.69035	0.921672
PDACT_KE332569.1_G004590	Syntaxin-61	-1.7191	-0.443804	-0.00253338	0.019352	0.533996	0.997186	0.871234	0.794176	0.999347
PDACT_KE332564.1_G003210	actin-related protein 8 LENGTH=471	0.697045	0.50055	0.939754	0.0194978	0.0927612	0.00169869	0.871849	0.354163	0.0171649
PDACT_KE332548.1_G002620	AP2-like ethylene-responsive transcription factor	0.804426	-0.0739047	-0.346039	0.0194711	0.829029	0.312659	0.871849	0.943757	0.547303
PDACT_KE332989.1_G000240	unknown protein; FUNCTIONS IN: molecular function unknown; INVOLVED IN: biological process unknown; LOCATED IN: nucleolus; EXPRESSED IN: 25 plant structures; EXPRESSED DURING: 15 growth stages; BEST Arabidopsis thaliana protein match is: unknown protein . LENGTH=434	0.787446	-0.0727598	0.398221	0.0195781	0.828491	0.236317	0.873845	0.943757	0.465979
PDACT_KE332648.1_G000760	unknown protein; BEST Arabidopsis thaliana protein match is: unknown protein . LENGTH=191	0.674464	0.741293	0.587181	0.0196264	0.010383	0.042107	0.874411	0.107082	0.155954
PDACT_KE332700.1_G001230	microtubule-associated proteins 65-1 LENGTH=616	1.64631	0.17586	-0.146599	0.019705	0.798375	0.831619	0.876318	0.929995	0.920208
PDACT_KE332583.1_G002910	Trafficking protein particle complex subunit 11	-1.41321	-0.857597	-1.3216	0.0197795	0.149554	0.0292775	0.876449	0.450384	0.123143
PDACT_KE332917.1_G000620	Cytochrome P450 superfamily protein LENGTH=513	-2.05047	-1.00752	-4.60548	0.0197585	0.238987	2.6376e-06	0.876449	0.564023	0.00012866
PDACT_KE332654.1_G001620	response regulator 3 LENGTH=231	1.68389	3.19837	1.86492	0.0198458	2.95186e-05	0.0103938	0.87655	0.00237156	0.0612529
PDACT_KE333014.1_G000530	H(+)-ATPase 2 LENGTH=981	0.724021	0.840693	0.410376	0.0198533	0.00692629	0.185468	0.87655	0.0843548	0.401866
PDACT_KE333569.1_G000150	ubiquitin 5 LENGTH=157	-0.819732	-0.909056	-1.33427	0.019959	0.00996031	0.000180999	0.878205	0.10484	0.00328048
PDACT_KE333008.1_G000470	Disease resistance protein (CC-NBS-LRR class) family LENGTH=927	-2.83131	-3.05068	-1.41472	0.0200805	0.0116655	0.243182	0.878205	0.114708	0.473797
PDACT_KE332824.1_G000100	Core-2/I-branching beta-1,6-N-acetylglucosaminyltransferase family protein LENGTH=417	-1.51834	-1.41913	-3.17885	0.0200882	0.0293525	4.77074e-06	0.878205	0.192417	0.000199773
PDACT_KE333080.1_G000460	Molybdenum cofactor sulfurase	-1.38808	-1.23889	-0.967947	0.0204642	0.0372083	0.102578	0.878205	0.219329	0.277345
PDACT_KE332660.1_G001620	squalene synthase 1 LENGTH=410	1.00903	-0.842885	0.0804773	0.0204354	0.0528562	0.852159	0.878205	0.265353	0.929793
PDACT_KE332549.1_G004260	Chloroplast photosystem II subunit X n=2 Tax=Phaseoleae RepID=C1K5D2 VIGRA	2.45675	1.89096	1.4378	0.0201343	0.0679108	0.159425	0.878205	0.303053	0.367664
PDACT_KE332574.1_G003740	Acetylglutamate kinase	-2.05061	1.63988	2.93149	0.0203433	0.0690164	0.00205906	0.878205	0.305228	0.0197941
PDACT_KE332671.1_G000710	Tetratricopeptide repeat (TPR)-like superfamily protein LENGTH=515	-1.18147	-0.764411	-1.22771	0.0200289	0.128908	0.0159418	0.878205	0.418766	0.0817749
PDACT_KE332642.1_G002270	unknown protein; LOCATED IN: chloroplast; BEST Arabidopsis thaliana protein match is: unknown protein . LENGTH=125	1.47293	0.680587	1.0724	0.0203703	0.276649	0.0885063	0.878205	0.603683	0.253034
PDACT_KE333028.1_G000590	Oxidoreductase family protein LENGTH=362	0.75214	0.3119	0.0376254	0.0204003	0.334205	0.907245	0.878205	0.655674	0.957495
PDACT_KE332667.1_G000600	Fatty acid hydroxylase superfamily LENGTH=630	-2.22877	1.59238	2.29701	0.0202304	0.342172	0.19184	0.878205	0.663189	0.409982
PDACT_KE332694.1_G001300	Pentatricopeptide repeat (PPR) superfamily protein LENGTH=730	-1.53801	0.556397	0.526948	0.020162	0.386258	0.412309	0.878205	0.696868	0.640174
PDACT_KE332730.1_G000600	Cytochrome P450 superfamily protein LENGTH=502	1.55389	0.497102	0.461533	0.0204106	0.448989	0.482175	0.878205	0.739847	0.695463
PDACT_KE332907.1_G000470	zinc-finger protein 3 LENGTH=193	3.75598	0.459661	2.42565	0.020205	0.643724	0.0852863	0.878205	0.858439	0.247554
PDACT_KE332869.1_G000340	cinnamoyl coa reductase LENGTH=332	1.56519	0.298947	0.32449	0.0201213	0.65061	0.622685	0.878205	0.861433	0.795277
PDACT_KE332583.1_G003480	unknown protein; Has 119 Blast hits to 93 proteins in 40 species: Archae - 0; Bacteria - 3; Metazoa - 18; Fungi - 12; Plants - 44; Viruses - 0; Other Eukaryotes - 42 (source: NCBI BLink). LENGTH=117	1.04812	0.0837926	0.924587	0.0203447	0.851847	0.0404136	0.878205	0.952483	0.151607
PDACT_KE332545.1_G006080	Auxin-responsive protein IAA27	0.831991	0.984584	0.991524	0.0205165	0.00622919	0.00589912	0.878626	0.0786805	0.0414903
PDACT_KE332557.1_G001280	Protein FAM91A1	0.7931	0.2148	0.0630882	0.0205457	0.529013	0.853666	0.878626	0.791215	0.930738
PDACT_KE333100.1_G000160	unknown protein; FUNCTIONS IN: molecular function unknown; INVOLVED IN: biological process unknown; LOCATED IN: chloroplast; EXPRESSED IN: 23 plant structures; EXPRESSED DURING: 15 growth stages; Has 45 Blast hits to 45 proteins in 11 species: Archae - 0; Bacteria - 0; Metazoa - 0; Fungi - 0; Plants - 45; Viruses - 0; Other Eukaryotes - 0 (source: NCBI BLink). LENGTH=80	0.985471	0.570804	0.625744	0.0205976	0.177269	0.139461	0.87931	0.489355	0.337117
PDACT_KE332826.1_G001210	Glutathione S-transferase, N-terminal domain containing protein n=3 Tax=Andropogoneae RepID=B4FN60 MAIZE	-0.623365	-0.906092	-1.07157	0.0207899	0.000821763	8.17203e-05	0.885002	0.0225493	0.00179755
PDACT_KE332633.1_G001090	DNA mismatch repair protein MutS	1.21856	-0.70726	-0.361996	0.0208231	0.177197	0.489258	0.885002	0.489353	0.70027
PDACT_KE332567.1_G000740	Subtilase family protein LENGTH=777	1.51482	0.336534	1.20771	0.0208393	0.600201	0.0633604	0.885002	0.833326	0.204072
PDACT_KE332676.1_G000990	Chalcone synthase 1	1.51463	-1.01027	-0.298759	0.0209319	0.119073	0.641867	0.885865	0.402965	0.807092
PDACT_KE333294.1_G000390	Coatomer, alpha subunit LENGTH=1218	-2.94897	0.379529	0.0599518	0.0208982	0.752734	0.960241	0.885865	0.910506	0.983208
PDACT_KE332694.1_G001380	Ribonuclease H-like superfamily protein LENGTH=575	-3.18966	-1.08823	-1.01408	0.0210531	0.485665	0.517863	0.887928	0.76356	0.72232
PDACT_KE332920.1_G000560	histone H2A 6 LENGTH=150	2.36414	0.107274	-0.35136	0.0210343	0.9101	0.695667	0.887928	0.972108	0.841227
PDACT_KE333139.1_G000470	Uncharacterised conserved protein UCP031279 LENGTH=179	-1.32145	0.594723	0.100328	0.0211906	0.290117	0.858361	0.888253	0.61518	0.933112
PDACT_KE332962.1_G000420	calmodulin-like 41 LENGTH=205	-2.05421	0.609789	-0.553323	0.0211912	0.483374	0.524076	0.888253	0.76241	0.726695
PDACT_KE332807.1_G000470	TTF-type zinc finger protein with HAT dimerisation domain LENGTH=733	-1.38534	-0.303221	-0.523161	0.0212293	0.605656	0.375717	0.888253	0.835927	0.606841
PDACT_KE332707.1_G001510	transportin 1 LENGTH=895	-1.47344	-0.299527	-0.265471	0.0212284	0.629052	0.670311	0.888253	0.850776	0.825849
PDACT_KE332545.1_G006180	ATP synthase subunit alpha n=2 Tax=fabids RepID=G7I9Q9 MEDTR	1.47105	0.181084	-0.332109	0.0212421	0.772297	0.59599	0.888253	0.920009	0.777459
PDACT_KE332556.1_G003710	Cytochrome P450 superfamily protein LENGTH=386	-2.96805	-2.96805	-2.96805	0.0213001	0.0194245	0.0224772	0.88916	0.151104	0.103266
PDACT_KE332554.1_G006010	sugar transporter 9 LENGTH=517	-0.710845	-1.29784	-1.48173	0.0216184	3.41298e-05	2.54947e-06	0.890931	0.00259167	0.000125699
PDACT_KE333169.1_G000380	ARGONAUTE 3 LENGTH=1194	1.99311	3.27984	5.29612	0.0218515	0.000562486	9.03309e-07	0.890931	0.0176255	5.61794e-05
PDACT_KE332765.1_G000230	ADP-L-glycero-D-manno-heptose-6-epimerase	0.989628	-1.2806	-1.80606	0.0218245	0.00319672	4.2007e-05	0.890931	0.0532388	0.0010904
PDACT_KE332827.1_G001510	Sec-independent protein translocase protein TATA, chloroplastic	1.44253	1.76609	1.29022	0.0218374	0.00539689	0.0395638	0.890931	0.0723047	0.149471
PDACT_KE333213.1_G000220	Dihydrolipoyl dehydrogenase	-0.805292	-0.878513	-1.39444	0.0216491	0.012339	8.58942e-05	0.890931	0.118519	0.00187089
PDACT_KE332578.1_G002110	Early light-induced protein 1, chloroplastic	1.47067	-1.49226	-0.923563	0.0218111	0.020023	0.144798	0.890931	0.153759	0.345518
PDACT_KE333935.1_G000260	elongation factor family protein LENGTH=676	-0.931147	-0.938221	-1.18163	0.0217818	0.0207244	0.00390472	0.890931	0.156786	0.031126
PDACT_KE332873.1_G000360	zinc finger homeodomain 1 LENGTH=242	1.09357	0.879527	1.61408	0.0217362	0.0640897	0.000812572	0.890931	0.294185	0.00993576
PDACT_KE332753.1_G000130	PATATIN-like protein 5 LENGTH=435	-1.63933	1.2929	0.921646	0.0214441	0.0668015	0.18806	0.890931	0.300595	0.405092
PDACT_KE332607.1_G003050	Poly [ADP-ribose] polymerase 15	1.30964	1.01361	0.23917	0.0217434	0.0736168	0.672276	0.890931	0.315534	0.826801
PDACT_KE333188.1_G000440	serine acetyltransferase 2;1 LENGTH=314	1.40023	-0.703094	-0.469508	0.0215079	0.242969	0.43516	0.890931	0.569187	0.659196
PDACT_KE332626.1_G002590	Guanine nucleotide-binding protein alpha-2 subunit	-1.25128	-0.468705	-1.2118	0.0216668	0.382675	0.0262496	0.890931	0.694689	0.114677
PDACT_KE332914.1_G000690	Fe/S biogenesis protein NfuA	0.914649	0.230508	0.446799	0.0216034	0.559681	0.258945	0.890931	0.811024	0.491038
PDACT_KE332759.1_G001030	S-adenosyl-L-methionine-dependent methyltransferases superfamily protein LENGTH=352	2.82662	0	0	0.0214055	1	1	0.890931	1	1
PDACT_KE333380.1_G000210	vesicle-associated membrane protein 721 LENGTH=219	0.753405	0.958038	1.19916	0.0220581	0.00367263	0.000296522	0.893032	0.057986	0.0047459
PDACT_KE332836.1_G000210	Nucleotide-diphospho-sugar transferases superfamily protein LENGTH=334	1.09153	0.999599	1.37664	0.0220415	0.0356801	0.00406536	0.893032	0.214343	0.0319903
PDACT_KE332612.1_G000140	ATP-binding cassette A1 LENGTH=1882	-1.19506	-0.616397	-0.5575	0.0220692	0.232043	0.27975	0.893032	0.556684	0.513676
PDACT_KE332806.1_G000560	Protein of unknown function (DUF3741) LENGTH=835	-1.72204	-0.365223	-0.386961	0.0220481	0.618855	0.600287	0.893032	0.844392	0.779638
PDACT_KE332623.1_G001890	Protein kinase superfamily protein LENGTH=492	0.949751	-0.113981	0.233599	0.0220853	0.781753	0.570378	0.893032	0.923406	0.759137
PDACT_KE332772.1_G000830	RWP-RK domain-containing protein LENGTH=269	-3.43431	-5.52423	-4.45281	0.0221644	4.59682e-05	0.00340895	0.893282	0.00323679	0.0284591
PDACT_KE332557.1_G004390	Cytochrome P450 superfamily protein LENGTH=512	1.61291	0.680623	-1.32257	0.0221354	0.324579	0.0587085	0.893282	0.645995	0.194785
PDACT_KE332545.1_G003320	Pectin lyase-like superfamily protein LENGTH=444	2.13423	1.3462	1.26811	0.0223169	0.138792	0.162711	0.895013	0.434404	0.371478
PDACT_KE332554.1_G002560	Glycosyltransferase family 61 protein LENGTH=470	-2.2757	0.377042	-2.20988	0.0223005	0.701652	0.0273748	0.895013	0.888106	0.11791
PDACT_KE332619.1_G002570	Zinc-binding dehydrogenase family protein LENGTH=350	2.34207	-0.158835	1.37909	0.0222747	0.869567	0.164235	0.895013	0.95873	0.373425
PDACT_KE333267.1_G000410	serine/threonine protein phosphatase 2A LENGTH=307	1.3964	1.71238	0.523811	0.0223716	0.00544467	0.387078	0.89574	0.0725877	0.61727
PDACT_KE332961.1_G000190	rRNA biogenesis protein RRP36	0.797735	0.733276	1.12369	0.0224452	0.0356601	0.00138423	0.89576	0.214328	0.0147668
PDACT_KE332593.1_G002110	Pre-mRNA-splicing factor CWC22	-3.45838	-1.96166	-1.96582	0.0224176	0.342214	0.342603	0.89576	0.663189	0.576114
PDACT_KE332548.1_G001500	Heat stress transcription factor C-2a	1.4311	-0.10485	1.03136	0.0224995	0.864651	0.0970135	0.896468	0.957384	0.267455
PDACT_KE332628.1_G001980	DC1 domain-containing protein LENGTH=578	0.918041	1.52573	1.85282	0.022622	0.000172421	6.21446e-06	0.899885	0.00814066	0.000246008
PDACT_KE332554.1_G004440	Heat shock 70 kDa protein 3	1.02755	2.96868	3.50676	0.0228542	6.78862e-10	1.09482e-12	0.903798	6.65394e-07	7.25065e-10
PDACT_KE332545.1_G006260	Bowman-Birk type trypsin inhibitor	2.32268	4.22706	2.65228	0.0227627	0.00416179	0.0167239	0.903798	0.0622211	0.0845303
PDACT_KE333022.1_G000270	Translation initiation factor SUI1 family protein LENGTH=113	2.87744	1.64567	3.26644	0.0228942	0.161547	0.0116961	0.903798	0.468523	0.0659609
PDACT_KE332586.1_G001080	Cell number regulator 8	1.5608	-0.175424	1.34898	0.0229048	0.794103	0.0481821	0.903798	0.928462	0.170545
PDACT_KE332601.1_G001840	Histone superfamily protein LENGTH=103	1.04349	-0.0182727	0.0304802	0.0227952	0.967875	0.946461	0.903798	0.991588	0.976344
PDACT_KE332564.1_G001530	Non-structural maintenance of chromosomes element 4 homolog A	-2.87528	-2.87528	-2.87528	0.0230876	0.0210667	0.0243516	0.907793	0.158639	0.10879
PDACT_KE333183.1_G000250	ABC transporter C family member 1	-0.874549	0.797084	1.0346	0.0230494	0.035625	0.00660658	0.907793	0.214222	0.0447096
PDACT_KE332653.1_G001400	DDB1- and CUL4-associated factor 6	0.727982	0.105467	0.623172	0.0231542	0.741314	0.0517739	0.907793	0.904508	0.17912
PDACT_KE332667.1_G002010	E3 ubiquitin-protein ligase MARCH3	0.760671	-0.0985101	-0.0516536	0.0231499	0.767699	0.877004	0.907793	0.917957	0.942381
PDACT_KE332573.1_G001710	Protein of unknown function (DUF1421) LENGTH=547	0.643818	0.608274	0.780275	0.0232029	0.0317923	0.00602653	0.908249	0.200679	0.0420843
PDACT_KE332696.1_G000340	Non-specific lipid-transfer protein 1	-2.93907	4.80358	5.13176	0.0232452	0.00123305	0.000681561	0.908452	0.0295643	0.00877152
PDACT_KE332631.1_G001360	Ectonucleotide pyrophosphatase/phosphodiesterase family member 3	-1.17729	-0.00361141	-1.92417	0.0233058	0.994368	0.00031981	0.90937	0.999437	0.00500743
PDACT_KE332767.1_G000920	Pentatricopeptide repeat (PPR) superfamily protein LENGTH=459	0.725245	0.447364	0.773384	0.0233758	0.160927	0.0157466	0.910653	0.467664	0.0811472
PDACT_KE332600.1_G003110	Protein kinase superfamily protein LENGTH=456	1.1161	0.348248	0.376448	0.0234182	0.474933	0.440824	0.910856	0.757618	0.663972
PDACT_KE332547.1_G007220	Protein kinase superfamily protein LENGTH=674	1.2004	1.61715	2.15242	0.0235851	0.00252113	7.61708e-05	0.911982	0.0464157	0.00170611
PDACT_KE333135.1_G000290	ubiquitin-conjugating enzyme 13 LENGTH=166	0.934905	1.20201	1.06082	0.023596	0.00374313	0.0103731	0.911982	0.0585333	0.0611896
PDACT_KE334333.1_G000130	Serine/threonine protein kinase SRPK1 n=1 Tax=Medicago truncatula RepID=G7L9C8 MEDTR	1.38438	-0.930041	0.476919	0.0234968	0.125641	0.428861	0.911982	0.413767	0.654225
PDACT_KE332595.1_G002880	Protein of unknown function (DUF707) LENGTH=395	1.09693	-0.129893	0.68163	0.0235448	0.786755	0.157106	0.911982	0.92539	0.364282
PDACT_KE332557.1_G004070	MKI67 FHA domain-interacting nucleolar phosphoprotein-like	0.658811	0.136655	-0.0614196	0.0236795	0.637888	0.832681	0.913769	0.855225	0.921091
PDACT_KE332569.1_G002420	ubiquitin-conjugating enzyme 13 LENGTH=166	0.879448	1.25095	0.880167	0.0241392	0.00142735	0.0241441	0.917562	0.032365	0.108218
PDACT_KE333427.1_G000200	Calcium uptake protein 1, mitochondrial	0.810394	0.901807	0.798928	0.0240744	0.0121577	0.0261698	0.917562	0.117427	0.114532
PDACT_KE332718.1_G001570	protein kinase family protein LENGTH=855	1.27437	1.21433	2.06127	0.0240023	0.03101	0.000342674	0.917562	0.197958	0.0052645
PDACT_KE332873.1_G000470	Phosphoribosylaminoimidazole-succinocarboxamide synthase	1.38114	1.23018	0.778661	0.02421	0.0435392	0.200235	0.917562	0.239158	0.421367
PDACT_KE332550.1_G004100	unknown protein; FUNCTIONS IN: molecular function unknown; INVOLVED IN: biological process unknown; LOCATED IN: endomembrane system; BEST Arabidopsis thaliana protein match is: unknown protein . LENGTH=557	-1.40766	1.07545	0.636297	0.0242026	0.0790711	0.296756	0.917562	0.326243	0.531053
PDACT_KE332549.1_G002110	cellulose synthase 6 LENGTH=1084	-1.01064	0.679649	0.00989966	0.0241034	0.126088	0.982148	0.917562	0.41445	0.992332
PDACT_KE332584.1_G001660	Transcription initiation factor TFIID subunit 4b	0.630422	0.358053	0.930998	0.0241295	0.199271	0.000912593	0.917562	0.517594	0.0108239
PDACT_KE332593.1_G002700	cytochrome P450, family 98, subfamily A, polypeptide 3 LENGTH=508	1.33077	0.622244	-0.347601	0.0238973	0.284616	0.550404	0.917562	0.611011	0.745761
PDACT_KE335574.1_G000140	Ankyrin repeat family protein LENGTH=240	3.87782	1.01873	0.292552	0.0240536	0.356552	0.746517	0.917562	0.67566	0.871535
PDACT_KE332964.1_G000280	salt tolerance homologue LENGTH=238	1.04153	0.286043	-0.0544803	0.0239951	0.531729	0.905224	0.917562	0.792404	0.95631
PDACT_KE332943.1_G000200	Xyloglucan galactosyltransferase KATAMARI1 homolog	0.758932	-0.175929	0.00522185	0.0242272	0.600418	0.987593	0.917562	0.833436	0.99527
PDACT_KE332975.1_G000190	HAT family dimerisation domain containing protein, expressed n=1 Tax=Oryza sativa subsp. japonica RepID=Q8S6T7 ORYSJ	-0.995898	0.0994132	-0.206318	0.0240461	0.819069	0.635953	0.917562	0.940201	0.803997
PDACT_KE332547.1_G001460	Pentatricopeptide repeat-containing protein	-0.821113	-0.539672	-0.834209	0.0243162	0.136952	0.0222429	0.919513	0.431845	0.102694
PDACT_KE332600.1_G002110	Protein kinase superfamily protein LENGTH=933	0.949729	1.84044	1.98795	0.0243626	1.7384e-05	3.89445e-06	0.919846	0.00162587	0.000171021
PDACT_KE333000.1_G000780	Transcription factor DP LENGTH=385	0.808508	0.646835	0.504103	0.0244693	0.0712604	0.160945	0.92072	0.31089	0.369545
PDACT_KE332561.1_G004230	Cysteine-rich receptor-like protein kinase 25	-2.43399	-1.90843	-3.63139	0.0244984	0.0744774	0.00105366	0.92072	0.317073	0.0120598
PDACT_KE332992.1_G000170	Nuclear migration protein nudC	0.698855	0.0633857	0.0484815	0.0244539	0.837679	0.875578	0.92072	0.946109	0.941875
PDACT_KE332590.1_G001710	Protein of unknown function (DUF1635) LENGTH=231	-1.73044	-1.97815	-2.19996	0.0247798	0.0109361	0.00502326	0.922097	0.110143	0.0370641
PDACT_KE332546.1_G003510	ribonuclease 1 LENGTH=230	-2.72997	1.90543	-0.648133	0.0248183	0.143826	0.597464	0.922097	0.442529	0.778105
PDACT_KE332706.1_G000140	Enhanced disease susceptibility 1 n=22 Tax=Arabidopsis thaliana RepID=B2BDC4 ARATH	1.13808	-0.56426	-0.523029	0.0246348	0.261354	0.297846	0.922097	0.587737	0.532149
PDACT_KE332587.1_G002040	Peroxidase superfamily protein LENGTH=401	2.25212	-0.912144	-0.43546	0.0248749	0.304007	0.631765	0.922097	0.627777	0.801548
PDACT_KE332716.1_G001610	Histone acetyltransferase type B catalytic subunit	0.863722	0.179778	0.349559	0.0248034	0.638332	0.361381	0.922097	0.855494	0.593969
PDACT_KE333272.1_G000260	Heat stress transcription factor A-2c	1.18338	-0.24314	0.28666	0.0247186	0.640245	0.581717	0.922097	0.85619	0.76668
PDACT_KE333170.1_G000380	Domain of unknown function (DUF220) LENGTH=338	0.769792	0.119206	0.754921	0.0248999	0.727381	0.0279042	0.922097	0.898811	0.119539
PDACT_KE332952.1_G000760	Dihydrolipoyl dehydrogenase	-0.862066	0.0914621	-0.135784	0.0249344	0.809623	0.721142	0.922097	0.935588	0.856686
PDACT_KE332619.1_G002170	TRAF-like superfamily protein LENGTH=572	1.9034	-0.124642	0.860911	0.024949	0.879106	0.296888	0.922097	0.962249	0.531212
PDACT_KE334293.1_G000140	Quinone oxidoreductase	0.731829	-0.0267418	-0.0990108	0.0249194	0.934386	0.760632	0.922097	0.980411	0.880173
PDACT_KE333589.1_G000270	Flap endonuclease 1-A	-0.955352	-0.0128656	0.530834	0.0249339	0.975546	0.206514	0.922097	0.993362	0.429588
PDACT_KE332784.1_G000920	Regulator of chromosome condensation (RCC1) family with FYVE zinc finger domain LENGTH=1075	1.24117	-0.889926	-1.86318	0.0250018	0.108104	0.00115085	0.922658	0.382733	0.012871
PDACT_KE332745.1_G000350	Unknown protein	1.11592	-0.258654	-0.92571	0.0251451	0.59995	0.0628182	0.926549	0.833243	0.202966
PDACT_KE332698.1_G001210	Chromodomain-helicase-DNA-binding protein 3	-1.12632	-0.547765	-0.850454	0.0251969	0.271215	0.0890955	0.927066	0.598229	0.253889
PDACT_KE332651.1_G001640	Regulator of telomere elongation helicase 1	-3.61025	0.918811	1.37053	0.0253663	0.538403	0.363745	0.930501	0.797178	0.595905
PDACT_KE332585.1_G003180	unknown protein; FUNCTIONS IN: molecular function unknown; INVOLVED IN: biological process unknown; LOCATED IN: plasma membrane; EXPRESSED IN: 20 plant structures; EXPRESSED DURING: 13 growth stages; Has 34 Blast hits to 34 proteins in 8 species: Archae - 0; Bacteria - 0; Metazoa - 0; Fungi - 0; Plants - 34; Viruses - 0; Other Eukaryotes - 0 (source: NCBI BLink). LENGTH=70	4.15759	-0.345943	0.0342036	0.0253322	0.732356	0.958185	0.930501	0.900735	0.982531
PDACT_KE335258.1_G000140	Yos1-like protein LENGTH=78	1.03219	0.754233	1.29726	0.0254494	0.101182	0.00515759	0.932156	0.370219	0.0377258
PDACT_KE332548.1_G002100	Galactosylgalactosylxylosylprotein 3-beta-glucuronosyltransferase 1	-2.18897	-0.208609	-1.57612	0.0255153	0.830024	0.108034	0.933174	0.943757	0.287152
PDACT_KE332576.1_G004130	Leucine-rich repeat receptor-like protein kinase family protein LENGTH=872	1.49389	2.57	3.30673	0.0256032	0.000192451	3.26391e-06	0.933602	0.00875886	0.000150619
PDACT_KE332548.1_G007100	Chloride intracellular channel protein 6	0.721161	0.470548	0.674564	0.0255667	0.144002	0.0366849	0.933602	0.442908	0.142371
PDACT_KE333442.1_G000400	O-methyltransferase 1 LENGTH=363	-2.86793	-1.09637	-2.94757	0.0256881	0.368378	0.0225273	0.93392	0.684037	0.103392
PDACT_KE332692.1_G000900	UDP-Glycosyltransferase superfamily protein LENGTH=455	-0.597278	-0.0486896	-0.298841	0.0256653	0.854864	0.262754	0.93392	0.954071	0.495005
PDACT_KE332644.1_G000890	KxDL motif-containing protein 1	0.644991	0.165493	0.511252	0.0257912	0.566793	0.0773476	0.936278	0.815323	0.232447
PDACT_KE332738.1_G000750	CASP-like protein	0.812705	0.872825	1.71893	0.025872	0.0167009	3.71124e-06	0.937823	0.139951	0.000165046
PDACT_KE332901.1_G000560	Protein of unknown function (DUF604) LENGTH=526	1.17118	0.865148	0.173801	0.025933	0.0979589	0.738528	0.938645	0.363805	0.867125
PDACT_KE332563.1_G000390	PLAC8 family protein LENGTH=526	-1.57498	0.48335	0.20146	0.0260192	0.483825	0.771372	0.940375	0.76252	0.886197
PDACT_KE332546.1_G002030	phosphatidylinositol-4-phosphate 5-kinase family protein LENGTH=1791	0.596539	-0.858618	-0.918626	0.0261162	0.00148644	0.000700333	0.94249	0.0333246	0.00893991
PDACT_KE335993.1_G000120	aluminum-activated malate transporter 9 LENGTH=598	-1.97464	0.315515	0.935465	0.0261712	0.720088	0.297068	0.943086	0.895596	0.531417
PDACT_KE332696.1_G001950	myb-like transcription factor family protein LENGTH=233	-1.53129	-0.92893	-0.686218	0.0262518	0.171637	0.310928	0.944602	0.482537	0.545304
PDACT_KE333066.1_G000280	cytochrome P450, family 71, subfamily B, polypeptide 9 LENGTH=500	-1.46675	-2.44085	-2.2326	0.0263049	0.000347104	0.0010076	0.945126	0.0127796	0.0116849
PDACT_KE332675.1_G001330	alpha/beta-Hydrolases superfamily protein LENGTH=566	0.694716	0.100799	1.06678	0.0264946	0.746658	0.000702347	0.950546	0.907455	0.00895403
PDACT_KE332557.1_G001910	unknown protein; FUNCTIONS IN: molecular function unknown; INVOLVED IN: biological process unknown; LOCATED IN: cellular component unknown; Has 37 Blast hits to 37 proteins in 14 species: Archae - 0; Bacteria - 0; Metazoa - 0; Fungi - 0; Plants - 36; Viruses - 0; Other Eukaryotes - 1 (source: NCBI BLink). LENGTH=91	0.954209	0.94585	0.636209	0.0267257	0.0279585	0.138244	0.951869	0.188006	0.335296
PDACT_KE332725.1_G001020	succinate dehydrogenase 5 LENGTH=257	0.810665	0.29382	0.0700105	0.0266692	0.419357	0.847406	0.951869	0.720309	0.927412
PDACT_KE333319.1_G000240	Nucleotide-diphospho-sugar transferase family protein LENGTH=428	0.736273	0.246669	0.221118	0.0267169	0.456052	0.504546	0.951869	0.74511	0.712342
PDACT_KE332763.1_G000780	tobamovirus multiplication 1 LENGTH=291	1.0177	0.240154	1.01937	0.0267069	0.598953	0.0267125	0.951869	0.832817	0.116127
PDACT_KE332561.1_G003030	Regulator of chromosome condensation (RCC1) family protein LENGTH=434	0.963531	0.0165662	0.960809	0.0267051	0.969385	0.0271768	0.951869	0.991931	0.117407
PDACT_KE332603.1_G000260	Late embryogenesis abundant protein Lea5	1.31371	-1.04263	-1.46709	0.0268985	0.0794343	0.01527	0.956636	0.326971	0.0795726
PDACT_KE332610.1_G000970	Dihydrolipoyllysine-residue succinyltransferase component of 2-oxoglutarate dehydrogenase complex	0.664865	1.05622	1.1411	0.0277022	0.000500365	0.000175275	0.956785	0.0163493	0.00319326
PDACT_KE332910.1_G000420	RING finger protein 150	1.07555	1.46916	2.02769	0.0278789	0.00271454	4.54883e-05	0.956785	0.0482008	0.00116273
PDACT_KE332624.1_G002160	WRKY DNA-binding protein 27 LENGTH=348	2.44459	3.45835	1.93995	0.0271682	0.00293927	0.0729011	0.956785	0.0506141	0.224404
PDACT_KE333762.1_G000100	n=1 Tax=Oryza sativa subsp. japonica RepID=Q7XV90 ORYSJ	1.92731	2.56113	2.07001	0.0272421	0.00455043	0.0189292	0.956785	0.0655904	0.0922332
PDACT_KE333151.1_G000380	Cell division cycle protein 20 homolog	0.986273	1.14162	1.38264	0.0271654	0.0106416	0.00209278	0.956785	0.108168	0.0200632
PDACT_KE333114.1_G000360	Mediator of DNA damage checkpoint protein 1	2.55596	2.78772	1.95372	0.027733	0.017888	0.0821588	0.956785	0.144808	0.241857
PDACT_KE332677.1_G000470	GATA transcription factor 15 LENGTH=149	0.751501	-0.791894	-0.403356	0.0278194	0.0219069	0.240953	0.956785	0.162187	0.471358
PDACT_KE335177.1_G000160	cyclin-dependent kinase B1;2 LENGTH=311	4.19348	4.13668	2.86653	0.0276512	0.0289321	0.0811034	0.956785	0.190803	0.239872
PDACT_KE333340.1_G000220	microtubule-associated proteins 70-2 LENGTH=634	1.83395	1.8039	2.51312	0.0273178	0.0290847	0.00336143	0.956785	0.191378	0.0281506
PDACT_KE333026.1_G000550	Protein of unknown function (DUF 3339) LENGTH=89	1.22013	1.18073	1.6255	0.0277733	0.0329113	0.00368003	0.956785	0.204945	0.0299293
PDACT_KE332568.1_G005610	unknown protein; BEST Arabidopsis thaliana protein match is: unknown protein . LENGTH=314	-1.54589	-1.22641	-2.12578	0.0270278	0.075665	0.00314053	0.956785	0.319286	0.0268793
PDACT_KE332560.1_G004620	Unknown protein	0.921681	0.703724	0.49169	0.0274859	0.0914239	0.238425	0.956785	0.351467	0.468176
PDACT_KE333489.1_G000360	Translation initiation factor SUI1 family protein LENGTH=113	1.40018	0.997807	1.9588	0.0271041	0.112068	0.00235971	0.956785	0.389862	0.0219374
PDACT_KE332595.1_G002030	PI-PLC X domain-containing protein	0.963851	-0.693828	-0.270369	0.0273948	0.112553	0.534602	0.956785	0.390671	0.735275
PDACT_KE332551.1_G002590	Replication protein A 32 kDa subunit A	2.17488	-1.38716	-1.7403	0.0276432	0.130718	0.0612584	0.956785	0.422259	0.199953
PDACT_KE333057.1_G000160	Disease resistance protein (CC-NBS-LRR class) family LENGTH=908	-1.32708	-0.89181	-0.68239	0.0272038	0.133339	0.250125	0.956785	0.426632	0.481674
PDACT_KE332566.1_G002440	unknown protein; FUNCTIONS IN: molecular function unknown; INVOLVED IN: biological process unknown; LOCATED IN: cellular component unknown; EXPRESSED IN: 23 plant structures; EXPRESSED DURING: 13 growth stages. LENGTH=188	1.19955	0.617836	0.886006	0.0276858	0.252128	0.102146	0.956785	0.579671	0.276485
PDACT_KE332917.1_G000630	Cytochrome P450 superfamily protein LENGTH=513	-2.45671	-0.93498	-4.0066	0.0278049	0.383047	0.000736212	0.956785	0.695015	0.00926085
PDACT_KE332691.1_G000980	3-hydroxyisobutyryl-CoA hydrolase-like protein 5	1.16334	0.413606	1.04358	0.0275357	0.428458	0.0477735	0.956785	0.726218	0.169904
PDACT_KE333210.1_G000240	Pentatricopeptide repeat-containing protein, putative n=1 Tax=Ricinus communis RepID=B9S7Q8 RICCO	-0.700153	-0.241831	-0.290187	0.027149	0.442342	0.357229	0.956785	0.735856	0.589543
PDACT_KE333081.1_G000120	COP9 signalosome complex subunit 6a	1.12091	0.285193	0.16306	0.0275773	0.571789	0.74689	0.956785	0.817872	0.871556
PDACT_KE332693.1_G001260	Transducin/WD40 repeat-like superfamily protein LENGTH=1377	-1.21423	-0.227831	-0.848934	0.0274483	0.672745	0.11974	0.956785	0.8743	0.306444
PDACT_KE333321.1_G000590	Late embryogenesis abundant protein, group 6 LENGTH=92	3.11087	-0.275236	1.0899	0.0273897	0.7956	0.369517	0.956785	0.929061	0.601638
PDACT_KE332553.1_G004680	Serine/threonine protein phosphatase 2A 59 kDa regulatory subunit B' gamma isoform	0.844221	0.0820025	-0.0286303	0.0278508	0.82995	0.940346	0.956785	0.943757	0.973931
PDACT_KE336456.1_G000110	G-type lectin S-receptor-like serine/threonine-protein kinase	-2.3662	-0.0570278	-2.3267	0.0269794	0.959452	0.0307556	0.956785	0.989027	0.127133
PDACT_KE332836.1_G000970	1,2-dihydroxy-3-keto-5-methylthiopentene dioxygenase 1	1.00169	0.628611	0.853402	0.0280423	0.165546	0.0606058	0.961049	0.473637	0.19878
PDACT_KE332772.1_G001250	myb domain protein 30 LENGTH=323	0.891078	0.263806	1.0992	0.0281009	0.513727	0.00694167	0.96171	0.781789	0.0464297
PDACT_KE332683.1_G000570	Protein kinase superfamily protein LENGTH=654	-1.51929	-1.37698	-2.61522	0.0283844	0.0457729	0.000307213	0.962007	0.245295	0.0048693
PDACT_KE332638.1_G001180	disease resistance protein (TIR-NBS-LRR class), putative LENGTH=1556	-1.0881	-0.74016	-0.794431	0.0282495	0.132511	0.107432	0.962007	0.425507	0.286144
PDACT_KE333868.1_G000150	Phosphoglycerate mutase family protein LENGTH=399	-0.917598	0.607197	-0.397308	0.0283625	0.141266	0.338352	0.962007	0.438064	0.571831
PDACT_KE332830.1_G000400	Protein of unknown function (DUF581) LENGTH=267	0.768016	-0.515341	0.0299158	0.0283756	0.142438	0.931849	0.962007	0.440155	0.970215
PDACT_KE333161.1_G000190	Solute carrier family 2, facilitated glucose transporter member 3	-1.93517	-0.926214	-1.3465	0.0283305	0.283666	0.122889	0.962007	0.610263	0.311384
PDACT_KE332634.1_G000780	UDP-glucose 4-epimerase	1.08227	-0.396171	-0.996399	0.0283376	0.4192	0.0447312	0.962007	0.720204	0.162553
PDACT_KE332552.1_G004340	Protein of unknown function (DUF1118) LENGTH=198	-0.753484	0.148484	0.0105882	0.0283495	0.662759	0.975234	0.962007	0.868452	0.98992
PDACT_KE333070.1_G000560	Chaperone protein DnaJ	0.991116	1.03007	1.26087	0.0284855	0.0228531	0.00557897	0.962772	0.166318	0.0398216
PDACT_KE332627.1_G002050	Biotin carboxyl carrier protein of acetyl-CoA carboxylase	0.891758	0.518166	1.05322	0.0284835	0.201332	0.00985789	0.962772	0.52002	0.0590689
PDACT_KE332988.1_G000120	CASP-like protein	0.767926	0.575318	1.23836	0.0285498	0.0999658	0.000455412	0.963614	0.367546	0.00648427
PDACT_KE332633.1_G000150	UDP-Glycosyltransferase superfamily protein LENGTH=670	0.985488	1.59302	1.23528	0.0286693	0.000441943	0.00631282	0.966125	0.0150757	0.0433789
PDACT_KE332719.1_G001010	Glyceraldehyde-3-phosphate dehydrogenase 3, cytosolic	-1.50418	0.400593	-0.591704	0.028703	0.552126	0.381325	0.966125	0.80598	0.611573
PDACT_KE332559.1_G003550	tRNA-dihydrouridine(47) synthase [NAD(P)(+)]-like	-0.791568	-0.834733	-0.832851	0.0287785	0.0211611	0.0215361	0.967299	0.159157	0.100621
PDACT_KE332555.1_G005790	1-aminocyclopropane-1-carboxylate synthase 9 LENGTH=470	-1.16293	0.00990876	-0.0268007	0.0288169	0.984894	0.959055	0.967299	0.996772	0.982725
PDACT_KE332717.1_G001680	basic helix-loop-helix (bHLH) DNA-binding superfamily protein LENGTH=450	1.37778	2.41205	3.74379	0.0289961	0.00490774	0.000608537	0.971061	0.0683991	0.00814769
PDACT_KE332644.1_G002560	Leucine-rich receptor-like protein kinase family protein LENGTH=1101	1.35821	1.46922	1.39979	0.0290141	0.0184484	0.0248411	0.971061	0.146971	0.110373
PDACT_KE333210.1_G000100	HAT family dimerisation domain containing protein n=1 Tax=Oryza sativa subsp. japonica RepID=Q7XD60 ORYSJ	-0.678279	-0.213611	0.0249014	0.0290825	0.489211	0.935725	0.971061	0.765953	0.97198
PDACT_KE332703.1_G000830	proline transporter 1 LENGTH=442	0.658379	-0.0848783	0.620584	0.0290874	0.777767	0.0396722	0.971061	0.922036	0.149719
PDACT_KE332580.1_G002570	prohibitin 1 LENGTH=288	0.765825	-0.282546	-0.239752	0.0291804	0.419456	0.493525	0.972837	0.720378	0.703793
PDACT_KE332545.1_G005090	Kinesin-related protein 6	0.785785	-0.06307	-0.334469	0.0292248	0.860504	0.352678	0.972996	0.956334	0.585503
PDACT_KE334346.1_G000160	Transmembrane and coiled-coil domain-containing protein 4	0.942875	0.833561	-0.0279703	0.0295528	0.053928	0.948378	0.982039	0.268807	0.977293
PDACT_KE332942.1_G000430	prephenate dehydratase 1 LENGTH=424	-0.732964	0.27622	0.0827988	0.0295766	0.407256	0.804165	0.982039	0.712236	0.904793
PDACT_KE332590.1_G001550	Plant protein 1589 of unknown function LENGTH=95	1.97419	-0.0516367	-1.4247	0.029755	0.952958	0.11045	0.986624	0.986593	0.291268
PDACT_KE332552.1_G006330	Auxin-responsive protein IAA15	0.937499	-1.42823	-1.69988	0.0303839	0.00114309	0.000127243	0.990387	0.0279823	0.00251651
PDACT_KE332982.1_G000760	Peroxisomal membrane protein 13	0.669331	0.934121	0.991542	0.0302457	0.0025544	0.00139245	0.990387	0.0466068	0.0148221
PDACT_KE332740.1_G000380	Glucose-repressible alcohol dehydrogenase transcriptional effector	-0.652419	-0.89053	-1.37655	0.0300728	0.00319124	6.92942e-06	0.990387	0.0532323	0.000269094
PDACT_KE332559.1_G004880	xyloglucan endotransglucosylase/hydrolase 6 LENGTH=292	-1.63948	2.54999	-0.609403	0.0303499	0.0982731	0.576927	0.990387	0.364424	0.763617
PDACT_KE332629.1_G001750	Ras-related protein Rab-25	1.30473	-0.812718	-0.257141	0.0300781	0.177421	0.668998	0.990387	0.489421	0.824895
PDACT_KE332582.1_G001340	Dihydropyrimidinase	-0.859629	0.452779	0.549727	0.0303604	0.250776	0.163621	0.990387	0.57792	0.372617
PDACT_KE332625.1_G002550	CCR4-NOT transcription complex subunit, putative n=2 Tax=rosids RepID=B9SW63 RICCO	-0.877947	-0.454979	-0.914795	0.0299494	0.257175	0.0238855	0.990387	0.584204	0.107523
PDACT_KE332567.1_G004580	SBP (S-ribonuclease binding protein) family protein LENGTH=335	-0.890355	-0.361556	0.548746	0.0300649	0.372117	0.17499	0.990387	0.686227	0.388262
PDACT_KE334556.1_G000130	O-methyltransferase family protein LENGTH=325	-3.18313	-1.17711	-3.03766	0.0303487	0.396084	0.0379739	0.990387	0.704205	0.14562
PDACT_KE332650.1_G001380	Condensin complex subunit 2	2.62504	-0.770064	-0.862255	0.0300167	0.444845	0.391908	0.990387	0.737286	0.621969
PDACT_KE332748.1_G000370	exocyst subunit exo70 family protein G1 LENGTH=687	-0.954492	-0.328045	0.0324765	0.0302621	0.449636	0.940103	0.990387	0.740217	0.973844
PDACT_KE332893.1_G000460	CYTOCHROME C-1 LENGTH=114	1.18743	0.371254	0.0398238	0.0303939	0.493543	0.941655	0.990387	0.769128	0.974626
PDACT_KE332796.1_G000770	HAT family dimerisation domain containing protein n=1 Tax=Oryza sativa subsp. japonica RepID=Q2R0F0 ORYSJ	-1.37732	0.106112	-0.0806475	0.0303682	0.864017	0.8968	0.990387	0.957264	0.952567
PDACT_KE332676.1_G001090	Phospholipid-transporting ATPase 2	-1.06732	-0.306844	-0.635493	0.0304769	0.526791	0.193454	0.991774	0.78951	0.412172
PDACT_KE335745.1_G000110	UPI0003D6EFF3 related cluster n=1 Tax=unknown RepID=UPI0003D6EFF3	-2.04763	-2.48489	-2.47296	0.0305291	0.0093038	0.0103377	0.992154	0.100343	0.0610984
PDACT_KE332637.1_G000320	FAD dependent oxidoreductase n=1 Tax=cyanobacterium PCC 7702 RepID=UPI00036A198D	-0.596991	-0.619807	-0.789237	0.030743	0.0249203	0.0044099	0.997782	0.17492	0.03379
PDACT_KE332558.1_G005370	Tetratricopeptide repeat protein 33	0.8159	0.842369	1.30037	0.0307851	0.0256803	0.00063543	0.997828	0.178517	0.00838029
PDACT_KE332644.1_G002110	BEST Arabidopsis thaliana protein match is: Galact s in 8 species: Archae - 0; Bacteria - 0; Metazoa - 0; Fungi - 0; Plants - 30; Viruses - 0; Other Eukaryotes - 0 (source: NCBI BLink). LENGTH=97	0.854468	3.92473	4.87687	0.0426174	1.79155e-17	4.20223e-24	1	4.39002e-13	1.02972e-19
PDACT_KE332566.1_G002260	Amidophosphoribosyltransferase	-0.24944	-3.31252	-2.95916	0.53381	6.69484e-14	1.00684e-11	1	8.20251e-10	5.87358e-09
PDACT_KE332775.1_G001240	Heat shock 70 kDa protein 3	0.178883	3.14185	3.63861	0.650868	2.18867e-13	9.63493e-17	1	1.22396e-09	2.05243e-13
PDACT_KE332585.1_G003640	fatty acid hydroxylase 1 LENGTH=237	0.194721	-2.31577	-2.398	0.513894	1.60214e-13	2.76054e-14	1	1.22396e-09	2.81851e-11
PDACT_KE332569.1_G005510	Receptor homology region, transmembrane domain- and RING domain-containing protein 1	0.0104352	-5.88767	-5.28364	0.987145	2.49747e-13	2.65285e-11	1	1.22396e-09	1.30011e-08
PDACT_KE333185.1_G000230	Dynein light chain	-0.220181	-2.85342	-3.58117	0.553273	9.39078e-13	6.60424e-18	1	3.28731e-09	1.79811e-14
PDACT_KE333128.1_G000300	auxin response factor 2 LENGTH=859	0.340225	-2.65713	-2.38823	0.347344	5.22262e-12	3.71023e-10	1	1.59969e-08	1.05105e-07
PDACT_KE333061.1_G000450	Lung seven transmembrane receptor family protein LENGTH=440	-0.711391	-6.12852	-4.67454	0.334743	9.05821e-12	4.91494e-08	1	2.46625e-08	5.4405e-06
PDACT_KE332548.1_G003370	Protein phosphatase 2C family protein LENGTH=380	0.387217	-2.4185	-2.77023	0.245531	1.04579e-11	2.53823e-14	1	2.5626e-08	2.70421e-11
PDACT_KE332709.1_G001250	Cell division cycle-associated 7-like protein	0.776383	-3.20523	-4.10396	0.0742156	2.90672e-11	1.18723e-15	1	6.47512e-08	1.81824e-12
PDACT_KE332630.1_G000870	multiprotein bridging factor 1B LENGTH=142	0.0392434	1.7961	1.97647	0.883211	4.3354e-11	5.46386e-13	1	8.17189e-08	4.31892e-10
PDACT_KE332999.1_G000210	Phosphatidylinositol 4-kinase gamma 7	0.688713	4.26703	5.27856	0.240874	6.9131e-11	1.33843e-14	1	1.20999e-07	1.76824e-11
PDACT_KE332661.1_G000260	Vesicular glutamate transporter 2.2	-0.0706262	-1.85731	-1.97226	0.800385	1.28058e-10	1.0854e-11	1	1.96122e-07	6.04469e-09
PDACT_KE333088.1_G000450	RING/U-box superfamily protein LENGTH=401	-0.119391	-1.68388	-1.51279	0.637802	1.20702e-10	6.32086e-09	1	1.96122e-07	1.17064e-06
PDACT_KE332771.1_G000570	histone H2A 11 LENGTH=136	0.818617	2.56116	2.0714	0.0349212	1.70621e-10	1.68203e-07	1	2.45934e-07	1.49335e-05
PDACT_KE332704.1_G001460	Crossover junction endonuclease EME1A	0.23583	-2.84431	-3.58867	0.567159	1.91196e-10	1.37107e-14	1	2.60282e-07	1.76824e-11
PDACT_KE332548.1_G003850	Omega-3 fatty acid desaturase, chloroplastic	-0.147925	-2.28972	-3.32039	0.666917	2.11574e-10	1.15017e-18	1	2.72863e-07	4.19039e-15
PDACT_KE332904.1_G000890	Serine/arginine-rich splicing factor 1	0.482575	2.06108	2.74492	0.128968	2.58764e-10	2.00053e-16	1	3.17038e-07	3.5015e-13
PDACT_KE332622.1_G001200	Chaperone protein dnaJ 49	0.19439	1.87892	2.10256	0.502316	3.09407e-10	2.73674e-12	1	3.30067e-07	1.71952e-09
PDACT_KE334048.1_G000130	sequence-specific DNA binding transcription factors LENGTH=443	-0.69831	-4.26715	-4.24543	0.23665	3.09809e-10	5.03701e-10	1	3.30067e-07	1.35634e-07
PDACT_KE333161.1_G000110	Peptidyl-tRNA hydrolase family protein LENGTH=250	-0.149474	1.97396	1.85197	0.622419	3.01798e-10	3.01616e-09	1	3.30067e-07	6.21075e-07
PDACT_KE332713.1_G001490	calcineurin B-like protein 8 LENGTH=214	-0.0946474	-2.0411	-3.27798	0.767725	1.08232e-09	3.15902e-20	1	9.85094e-07	1.93522e-16
PDACT_KE332557.1_G003360	Energy-coupling factor transporter ATP-binding protein EcfA2	0.1883	-1.92004	-1.94552	0.534066	1.12744e-09	7.52416e-10	1	9.85094e-07	1.90074e-07
PDACT_KE332547.1_G002450	Solute carrier family 2, facilitated glucose transporter member 2	0.687106	-4.58757	-3.63637	0.290874	1.16584e-09	5.9874e-07	1	9.85094e-07	4.10575e-05
PDACT_KE332584.1_G000800	LON peptidase N-terminal domain and RING finger protein 1	0.109016	-1.83081	-1.4213	0.707567	1.09813e-09	1.69319e-06	1	9.85094e-07	9.28187e-05
PDACT_KE332567.1_G004230	MLO-like protein 3	-0.427278	-3.17064	-5.36664	0.377808	1.82531e-09	1.06165e-19	1	1.44282e-06	5.20292e-16
PDACT_KE332711.1_G001410	Zinc finger protein CONSTANS-LIKE 2	0.896309	-2.81798	-1.21604	0.0453062	3.67065e-09	0.00711378	1	2.8108e-06	0.0472548
PDACT_KE332661.1_G001950	AP2-like ethylene-responsive transcription factor	-0.264984	-1.81309	-1.56401	0.374774	4.04734e-09	3.23655e-07	1	3.00533e-06	2.48616e-05
PDACT_KE332556.1_G002580	Uncharacterised protein family SERF LENGTH=78	0.376982	1.72387	2.14141	0.189639	4.53333e-09	6.60964e-13	1	3.1474e-06	4.90796e-10
PDACT_KE332569.1_G003070	response regulator 12 LENGTH=596	-0.0397263	-2.88842	-2.00219	0.930955	4.624e-09	2.61539e-05	1	3.1474e-06	0.000761134
PDACT_KE332602.1_G002070	NAD(P)H dehydrogenase (quinone)	0.747956	-2.45392	-3.69646	0.0629953	6.31212e-09	1.2315e-16	1	4.18033e-06	2.32129e-13
PDACT_KE333039.1_G000330	Thioredoxin superfamily protein LENGTH=186	0.0369131	2.06477	2.14591	0.914647	7.75673e-09	2.18711e-09	1	5.00186e-06	4.82819e-07
PDACT_KE332613.1_G000480	Centromere protein S	-0.382716	-3.42895	-4.21823	0.476154	1.06025e-08	2.87607e-11	1	6.49511e-06	1.35529e-08
PDACT_KE333362.1_G000130	Aldehyde dehydrogenase	0.217073	-2.00801	-1.95824	0.521933	1.15679e-08	2.50513e-08	1	6.91364e-06	3.31815e-06
PDACT_KE332554.1_G005190	Aspartokinase	-0.0491626	1.96107	1.59016	0.884713	1.59489e-08	3.72962e-06	1	9.30506e-06	0.000165263
PDACT_KE332944.1_G000150	GDP-D-glucose phosphorylase 1	-0.239327	-2.1236	-2.40607	0.507066	1.67176e-08	2.67547e-10	1	9.52669e-06	8.85942e-08
PDACT_KE333488.1_G000210	Leucine-rich repeat protein kinase family protein LENGTH=890	-0.463426	-3.75749	-3.75392	0.435312	2.04772e-08	3.22766e-08	1	1.14039e-05	3.95586e-06
PDACT_KE332547.1_G001620	BTB/POZ domain-containing protein FBL11	0.013935	-1.60719	-1.49496	0.960302	2.20087e-08	1.79841e-07	1	1.1724e-05	1.56827e-05
PDACT_KE332823.1_G000470	FAD/NAD(P)-binding oxidoreductase family protein LENGTH=466	-0.0191004	-2.65428	-1.86868	0.965346	2.18057e-08	5.01312e-05	1	1.1724e-05	0.00124854
PDACT_KE332585.1_G001510	lipoxygenase 2 LENGTH=896	0.233519	6.58867	9.57603	0.799033	2.27464e-08	8.26008e-13	1	1.18591e-05	5.783e-10
PDACT_KE332661.1_G001200	Myosin heavy chain-related protein LENGTH=783	-0.104584	-1.5102	-1.22856	0.694021	2.96034e-08	5.59331e-06	1	1.51126e-05	0.000226632
PDACT_KE332652.1_G001210	Solute carrier family 2, facilitated glucose transporter member 8	-0.396077	-2.39187	-3.39501	0.337012	3.71985e-08	9.39022e-14	1	1.82302e-05	8.84992e-11
PDACT_KE333088.1_G000470	RING/U-box superfamily protein LENGTH=401	0.107295	-1.42754	-1.18592	0.672356	3.67633e-08	4.24025e-06	1	1.82302e-05	0.000182928
PDACT_KE332572.1_G001060	plastid developmental protein DAG, putative LENGTH=244	0.224949	1.60303	1.65119	0.435526	5.17344e-08	2.14124e-08	1	2.43788e-05	2.96435e-06
PDACT_KE332906.1_G000720	dual specificity protein phosphatase family protein LENGTH=929	0.167324	-4.25749	-1.6975	0.812147	5.12798e-08	0.0193919	1	2.43788e-05	0.0935947
PDACT_KE332767.1_G000840	lecithin:cholesterol acyltransferase 3 LENGTH=447	0.200624	1.87728	2.32477	0.55769	5.86771e-08	3.44923e-11	1	2.68266e-05	1.50928e-08
PDACT_KE332554.1_G002110	Protein kinase superfamily protein LENGTH=690	-0.544079	1.99016	1.61777	0.130848	5.91183e-08	8.55036e-06	1	2.68266e-05	0.000320855
PDACT_KE333097.1_G000150	Ras-related protein Rab-6A	-0.487637	-1.63682	-0.898191	0.0976906	6.63483e-08	0.00250229	1	2.956e-05	0.022845
PDACT_KE332999.1_G000380	basic helix-loop-helix (bHLH) DNA-binding superfamily protein LENGTH=532	-0.0606857	-1.43955	-1.21913	0.816904	8.26094e-08	5.1158e-06	1	3.4901e-05	0.000211752
PDACT_KE332552.1_G007380	Protein of unknown function (DUF1644) LENGTH=354	-0.0698977	-1.56002	-1.90548	0.80562	8.48486e-08	1.0443e-10	1	3.52395e-05	3.99836e-08
PDACT_KE332646.1_G000120	UPF0428 protein CXorf56 homolog	-0.0643782	-1.67486	-1.56017	0.831877	9.05548e-08	6.2038e-07	1	3.69826e-05	4.18491e-05
PDACT_KE333105.1_G000620	Pectin lyase-like superfamily protein LENGTH=475	0.537219	4.6728	5.53134	0.360452	9.73831e-08	1.96093e-09	1	3.91193e-05	4.40832e-07
PDACT_KE332628.1_G001500	Protein of unknown function (DUF789) LENGTH=360	-0.158342	-1.60005	-1.23272	0.587602	1.00073e-07	3.45238e-05	1	3.95515e-05	0.000931448
PDACT_KE332571.1_G000970	ankyrin repeat family protein LENGTH=456	0.230564	1.64234	2.12331	0.448234	1.03539e-07	1.17604e-11	1	3.96425e-05	6.37399e-09
PDACT_KE332582.1_G002370	unknown protein; BEST Arabidopsis thaliana protein match is: unknown protein . LENGTH=283	0.0127505	-1.29764	-1.44043	0.957447	1.02674e-07	4.32794e-09	1	3.96425e-05	8.55257e-07
PDACT_KE332585.1_G001760	Glucan endo-1,3-beta-glucosidase 8	0.0679121	-4.64709	-4.46894	0.928411	1.10818e-07	3.02368e-07	1	4.17767e-05	2.34788e-05
PDACT_KE332579.1_G003420	AMME syndrome candidate gene 1 protein	-0.052012	2.56357	2.39261	0.910756	1.16696e-07	6.55603e-07	1	4.26794e-05	4.33016e-05
PDACT_KE332552.1_G000170	Protein phosphatase 2C 57	-0.369922	-1.73011	-1.88507	0.24502	1.21108e-07	9.68246e-09	1	4.36418e-05	1.56091e-06
PDACT_KE332572.1_G002660	RING-H2 finger protein 2B LENGTH=147	0.0780402	-1.35381	-0.914487	0.756077	1.25701e-07	0.000313475	1	4.46402e-05	0.00493663
PDACT_KE332651.1_G000940	unknown protein; Has 524 Blast hits to 342 proteins in 101 species: Archae - 0; Bacteria - 106; Metazoa - 106; Fungi - 24; Plants - 25; Viruses - 0; Other Eukaryotes - 263 (source: NCBI BLink). LENGTH=668	0.143738	-1.52066	-1.82725	0.60924	1.30177e-07	3.5376e-10	1	4.55695e-05	1.0444e-07
PDACT_KE332566.1_G001810	Mitochondrial substrate carrier family protein LENGTH=300	-0.27902	-1.36007	-1.77579	0.270623	1.38704e-07	1.21548e-11	1	4.78705e-05	6.37399e-09
PDACT_KE332975.1_G000650	60 kDa chaperonin 1	0.244406	1.95828	2.15034	0.498556	1.54871e-07	1.0449e-08	1	5.21495e-05	1.63084e-06
PDACT_KE332794.1_G000690	alpha/beta-Hydrolases superfamily protein LENGTH=382	-0.142076	-2.10294	-1.99391	0.7094	1.55359e-07	6.66266e-07	1	5.21495e-05	4.37699e-05
PDACT_KE332892.1_G000430	Protein kinase superfamily protein LENGTH=557	0.144837	-1.62654	-1.8593	0.631722	1.60158e-07	2.84251e-09	1	5.27395e-05	5.96649e-07
PDACT_KE332823.1_G000460	FAD/NAD(P)-binding oxidoreductase family protein LENGTH=466	-0.254119	-2.5113	-2.48638	0.571169	1.61421e-07	2.46531e-07	1	5.27395e-05	2.00033e-05
PDACT_KE332654.1_G001610	Eukaryotic translation initiation factor 2D	0.451935	1.92099	1.93893	0.206498	1.69522e-07	1.34633e-07	1	5.40896e-05	1.26886e-05
PDACT_KE332611.1_G000190	Dehydrogenase/reductase SDR family protein 7-like	0.231233	2.27807	2.35724	0.588515	2.09851e-07	8.62915e-08	1	6.50911e-05	8.7016e-06
PDACT_KE332625.1_G002390	Ectonucleoside triphosphate diphosphohydrolase 5	-0.353748	-7.0128	0.250383	0.734585	2.07702e-07	0.810247	1	6.50911e-05	0.908455
PDACT_KE332651.1_G000990	Late embryogenesis abundant protein LENGTH=151	0.29728	-1.89391	-1.15454	0.399471	2.18768e-07	0.00125989	1	6.70086e-05	0.0138131
PDACT_KE332717.1_G001580	Major facilitator superfamily protein LENGTH=500	0.0703372	-2.34404	-2.53874	0.869378	2.3125e-07	3.33237e-08	1	6.91042e-05	4.0424e-06
PDACT_KE332678.1_G001510	histidinol phosphate aminotransferase 1 LENGTH=417	-0.00175041	1.32987	1.08314	0.994487	2.30445e-07	2.29075e-05	1	6.91042e-05	0.00068371
PDACT_KE335765.1_G000120	S-ribonuclease binding protein 1 LENGTH=325	0.595786	1.845	2.27523	0.0865134	2.34438e-07	3.33755e-10	1	6.9213e-05	9.97357e-08
PDACT_KE333150.1_G000220	purine permease 3 LENGTH=351	-0.137158	-1.5301	-1.5455	0.634851	2.44381e-07	1.95542e-07	1	6.9832e-05	1.68717e-05
PDACT_KE333150.1_G000260	purine permease 3 LENGTH=351	-0.137158	-1.5301	-1.5455	0.634834	2.44056e-07	1.9528e-07	1	6.9832e-05	1.68717e-05
PDACT_KE333034.1_G000570	squamosa promoter binding protein-like 4 LENGTH=174	-0.172758	-1.8249	-1.64024	0.61196	2.45085e-07	3.32965e-06	1	6.9832e-05	0.000152336
PDACT_KE332716.1_G000280	myb-like transcription factor family protein LENGTH=233	-0.172465	-1.99025	-3.65002	0.642675	2.48326e-07	1.19706e-18	1	6.99424e-05	4.19039e-15
PDACT_KE332873.1_G000820	unknown protein; FUNCTIONS IN: molecular function unknown; INVOLVED IN: biological process unknown; LOCATED IN: endoplasmic reticulum; EXPRESSED IN: 24 plant structures; EXPRESSED DURING: 13 growth stages; BEST Arabidopsis thaliana protein match is: unknown protein . LENGTH=242	1.20677	3.56572	6.55776	0.0623551	2.6799e-07	1.00511e-16	1	7.46232e-05	2.05243e-13
PDACT_KE332576.1_G001090	sulfotransferase 4B LENGTH=331	0.152086	-1.81448	-3.65362	0.656493	2.77001e-07	1.08583e-21	1	7.62654e-05	8.86905e-18
PDACT_KE332619.1_G001600	protein n=3 Tax=Oryza sativa RepID=Q0JGX1 ORYSJ	-0.175956	-2.37898	-2.1235	0.687525	2.82724e-07	3.89344e-06	1	7.69763e-05	0.000171021
PDACT_KE333004.1_G000200	Histidine-containing phosphotransfer protein 4	0.947483	-4.22433	-2.58419	0.194882	3.24363e-07	0.000787598	1	8.73429e-05	0.00973237
PDACT_KE332552.1_G005430	one-helix protein 2 LENGTH=172	0.0904436	-3.97027	-2.85359	0.895932	3.44221e-07	0.000126346	1	9.08388e-05	0.00250484
PDACT_KE332584.1_G002180	LOB domain-containing protein 38 LENGTH=247	0.426917	1.93165	1.1684	0.245628	3.48467e-07	0.00166349	1	9.08388e-05	0.0168718
PDACT_KE332588.1_G001160	kinesin 4 LENGTH=987	0.14966	3.27492	3.71066	0.807476	3.52803e-07	1.4621e-08	1	9.10008e-05	2.198e-06
PDACT_KE332548.1_G005740	Cytochrome P450 superfamily protein LENGTH=513	0.34127	4.65011	2.51599	0.657581	3.75935e-07	0.00235848	1	9.59575e-05	0.0219374
PDACT_KE332611.1_G000680	Endoplasmic reticulum-Golgi intermediate compartment protein 3	-0.319138	2.20665	1.98014	0.451483	3.98664e-07	4.6754e-06	1	0.00010071	0.000198555
PDACT_KE332631.1_G000450	Eukaryotic initiation factor 4A-15	0.0477764	2.60647	3.21584	0.925657	4.06395e-07	9.36238e-10	1	0.000101615	2.31733e-07
PDACT_KE332956.1_G000390	Pentatricopeptide repeat-containing protein	0.193687	1.63341	1.33355	0.540417	4.32941e-07	3.23085e-05	1	0.000107079	0.000890441
PDACT_KE333017.1_G000350	subtilisin-like serine protease 2 LENGTH=764	-0.665282	-2.16462	-1.72927	0.106024	4.36985e-07	4.22512e-05	1	0.000107079	0.00109558
PDACT_KE332605.1_G002620	Protein of unknown function, DUF593 LENGTH=387	-0.332357	-2.15037	-2.13307	0.413745	4.43133e-07	5.70113e-07	1	0.00010751	3.94634e-05
PDACT_KE332958.1_G001180	LPS:glycosyltransferase n=3 Tax=Labrenzia RepID=U7FMV7 9RHOB	0.885379	5.41218	8.53277	0.20617	4.50097e-07	1.90971e-11	1	0.000107543	9.55011e-09
PDACT_KE332734.1_G000180	Serine/arginine-rich splicing factor 1	0.201051	1.27026	1.55742	0.419675	4.52046e-07	8.1294e-10	1	0.000107543	2.03268e-07
PDACT_KE332545.1_G011260	Transcription regulator, putative n=1 Tax=Ricinus communis RepID=B9SYW7 RICCO	0.305646	1.67092	1.78236	0.353421	5.31125e-07	9.90935e-08	1	0.00012278	9.72585e-06
PDACT_KE332595.1_G002110	AP2-like ethylene-responsive transcription factor	-0.302139	-1.48578	-0.825138	0.296469	5.27288e-07	0.00467328	1	0.00012278	0.0352134
PDACT_KE332656.1_G001710	arginine methyltransferase 11 LENGTH=390	0.00908584	-1.33607	-1.8816	0.972282	5.64822e-07	4.80672e-12	1	0.000128152	2.9446e-09
PDACT_KE333228.1_G000380	F-box/LRR-repeat protein 14	0.357192	-2.39876	-0.758727	0.433343	5.73426e-07	0.0976599	1	0.00012891	0.268611
PDACT_KE334533.1_G000120	cytochrome P450, family 707, subfamily A, polypeptide 4 LENGTH=468	0.422142	-2.94805	-1.16428	0.435089	5.8285e-07	0.034289	1	0.000129838	0.136443
PDACT_KE332884.1_G000280	Haloacid dehalogenase-like hydrolase (HAD) superfamily protein LENGTH=372	0.410549	1.30144	1.34154	0.113414	6.49802e-07	3.05358e-07	1	0.000142167	2.36041e-05
PDACT_KE332545.1_G004440	Peptidase C45, acyl-coenzyme A:6-aminopenicillanic acid acyl-transferase n=9 Tax=Burkholderia RepID=A0AZJ5 BURCH	-0.469291	-1.46355	-1.57938	0.104637	6.89405e-07	9.51207e-08	1	0.000149497	9.43659e-06
PDACT_KE332944.1_G000160	GDP-D-glucose phosphorylase 1	-0.197388	-2.35711	-2.19153	0.661496	7.05124e-07	3.63374e-06	1	0.000151565	0.000162781
PDACT_KE332668.1_G001580	D-3-phosphoglycerate dehydrogenase LENGTH=603	0.556022	2.0723	1.64381	0.172169	7.28292e-07	7.0698e-05	1	0.000155183	0.00161905
PDACT_KE332642.1_G000720	6-phosphofructo-2-kinase/fructose-2,6-bisphosphatase	-0.0538143	-1.68066	-2.21162	0.870709	7.53539e-07	1.63786e-10	1	0.000159179	5.73346e-08
PDACT_KE332652.1_G001110	sugar transporter 4 LENGTH=514	-0.30972	-2.42817	-3.42985	0.50496	7.60902e-07	3.12929e-11	1	0.00015936	1.4468e-08
PDACT_KE332556.1_G001730	RNA-binding protein 1 LENGTH=360	0.106604	-1.31873	-1.41112	0.684463	8.36853e-07	1.52115e-07	1	0.000169147	1.38566e-05
PDACT_KE332841.1_G000640	Leucine-rich repeat receptor-like protein kinase family protein LENGTH=1045	-0.436239	-2.32015	-2.48577	0.328739	8.22929e-07	1.7897e-07	1	0.000169147	1.56625e-05
PDACT_KE332735.1_G000860	GATA transcription factor 16 LENGTH=139	1.25215	3.31029	3.1248	0.0463021	8.44837e-07	2.82323e-06	1	0.000169147	0.000135914
PDACT_KE332593.1_G000820	10 kDa chaperonin	0.936971	2.4367	1.91865	0.0485597	8.50274e-07	7.94945e-05	1	0.000169147	0.00175806
PDACT_KE333067.1_G000440	allene oxide cyclase 3 LENGTH=258	0.3147	2.00837	1.3369	0.424972	8.55951e-07	0.0008403	1	0.000169147	0.0101972
PDACT_KE333951.1_G000120	Lysine histidine transporter-like 8	-1.55485	-4.07374	-4.76906	0.0380644	8.99474e-07	2.98177e-08	1	0.000172826	3.74694e-06
PDACT_KE332565.1_G004480	Ras-like GTP-binding protein RHO	0.959223	3.44617	3.65311	0.141199	9.02782e-07	2.51131e-07	1	0.000172826	2.01964e-05
PDACT_KE332556.1_G000190	F-box/kelch-repeat protein	-0.43518	-3.64825	-3.54331	0.514527	9.00888e-07	1.86076e-06	1	0.000172826	9.93378e-05
PDACT_KE333427.1_G000310	serine-rich protein-related LENGTH=220	0.625388	2.93963	2.57555	0.269775	9.46521e-07	1.35347e-05	1	0.000179795	0.000450419
PDACT_KE332608.1_G000340	Carbonyl reductase [NADPH] 3	-0.468594	2.73262	3.05079	0.394596	1.08544e-06	7.62761e-08	1	0.000204597	8.02176e-06
PDACT_KE333454.1_G000240	RNA-binding KH domain-containing protein LENGTH=548	-0.411333	-1.35988	-1.36212	0.133579	1.0952e-06	1.07576e-06	1	0.000204862	6.49271e-05
PDACT_KE332809.1_G000700	copper ion binding LENGTH=250	-0.026047	1.63409	1.59899	0.937373	1.14264e-06	1.92871e-06	1	0.000212116	0.000101698
PDACT_KE332641.1_G002770	Regulator of chromosome condensation (RCC1) family protein LENGTH=471	1.00733	2.93653	3.56334	0.0772847	1.17903e-06	9.6124e-09	1	0.000217226	1.56091e-06
PDACT_KE332547.1_G001340	Major facilitator superfamily protein LENGTH=461	-1.4983	-4.53985	-5.20038	0.0702553	1.27607e-06	7.8677e-08	1	0.000233278	8.23889e-06
PDACT_KE333216.1_G000140	Aspartate-semialdehyde dehydrogenase	0.0213845	1.44289	0.97726	0.941933	1.2852e-06	0.000936249	1	0.000233278	0.0110461
PDACT_KE332888.1_G000920	UDP-Glycosyltransferase superfamily protein LENGTH=480	-0.341955	-2.39783	-2.70272	0.468246	1.3494e-06	7.50896e-08	1	0.000241355	7.93101e-06
PDACT_KE332699.1_G001270	SWIB/MDM2 domain superfamily protein LENGTH=109	0.0195419	-1.44783	-1.15165	0.946696	1.34613e-06	0.000108791	1	0.000241355	0.00223642
PDACT_KE332659.1_G001200	unknown protein; FUNCTIONS IN: molecular function unknown; INVOLVED IN: biological process unknown; LOCATED IN: mitochondrion; EXPRESSED IN: 23 plant structures; EXPRESSED DURING: 15 growth stages; Has 31 Blast hits to 31 proteins in 12 species: Archae - 0; Bacteria - 0; Metazoa - 0; Fungi - 0; Plants - 31; Viruses - 0; Other Eukaryotes - 0 (source: NCBI BLink). LENGTH=238	0.184512	-1.57307	-1.81456	0.558097	1.36977e-06	3.99636e-08	1	0.000243224	4.70801e-06
PDACT_KE332663.1_G000900	CAAX amino terminal protease family protein LENGTH=322	-0.456978	-1.39023	-1.4372	0.106507	1.38852e-06	6.36278e-07	1	0.000244779	4.24833e-05
PDACT_KE332678.1_G001320	flavonol synthase 1 LENGTH=336	-0.382183	-3.73209	-4.00636	0.5832	1.4655e-06	3.51927e-07	1	0.000256505	2.69488e-05
PDACT_KE333985.1_G000150	response regulator 12 LENGTH=596	-0.00252254	-1.80702	-1.74506	0.994475	1.50621e-06	3.25695e-06	1	0.00026176	0.000150582
PDACT_KE332654.1_G000470	GDP-D-glucose phosphorylase 1	0.604487	-2.32561	-2.63232	0.19201	1.60193e-06	8.0636e-08	1	0.000276435	8.4081e-06
PDACT_KE332677.1_G001220	Sucrose-phosphatase-related family protein n=1 Tax=Populus trichocarpa RepID=B9GSG4 POPTR	0.476789	2.17979	2.07391	0.280394	1.67418e-06	4.92849e-06	1	0.00028489	0.000205038
PDACT_KE332576.1_G001790	Cytochrome P450 superfamily protein LENGTH=513	-0.496511	-4.30119	-2.03567	0.529876	1.66933e-06	0.0128774	1	0.00028489	0.0704193
PDACT_KE332546.1_G008900	gigantea protein (GI) LENGTH=1173	0.248841	-2.28218	-1.90405	0.584763	1.72499e-06	5.25289e-05	1	0.000291512	0.00128846
PDACT_KE332720.1_G000260	Protein kinase superfamily protein LENGTH=464	-0.143029	-1.34417	-1.27911	0.604411	1.76762e-06	5.34776e-06	1	0.00029583	0.0002195
PDACT_KE332788.1_G001100	kinesin 4 LENGTH=987	-0.802674	-3.87291	-4.36405	0.273065	1.79548e-06	2.15293e-07	1	0.000297274	1.8129e-05
PDACT_KE332956.1_G000550	Syntaxin-124	1.04522	4.10457	4.77905	0.171843	1.81065e-06	7.42888e-08	1	0.000297773	7.8804e-06
PDACT_KE332658.1_G002190	Amino-acid acetyltransferase	0.338744	2.07272	0.988695	0.419374	1.8904e-06	0.0193606	1	0.000308816	0.0934985
PDACT_KE332976.1_G000350	BSD domain-containing protein LENGTH=470	-0.395913	-1.36694	-1.72264	0.16065	1.92936e-06	2.96662e-09	1	0.000312344	6.1605e-07
PDACT_KE332553.1_G004380	Bromodomain-containing protein 1	0.208016	-1.30769	-1.16239	0.439235	1.93749e-06	2.2423e-05	1	0.000312344	0.000673349
PDACT_KE332579.1_G001680	myb domain protein 12 LENGTH=371	0.83911	-2.99614	-3.62038	0.152864	2.01212e-06	3.14285e-08	1	0.000322255	3.90926e-06
PDACT_KE333773.1_G000280	plastid developmental protein DAG, putative LENGTH=244	0.146482	1.68284	1.40435	0.672341	2.10921e-06	6.69751e-05	1	0.00033561	0.00155635
PDACT_KE332649.1_G000600	beta-amylase 1 LENGTH=575	0.108393	-2.6645	-2.28302	0.837557	2.18198e-06	3.80513e-05	1	0.00034495	0.00101019
PDACT_KE332583.1_G002800	Splicing factor U2AF 35 kDa subunit	0.555965	1.68731	2.07224	0.111329	2.23084e-06	9.43304e-09	1	0.000350414	1.56091e-06
PDACT_KE332616.1_G003150	Pyruvate kinase family protein LENGTH=596	-0.104958	-1.55192	-1.79716	0.742592	2.26044e-06	5.88741e-08	1	0.000352801	6.38341e-06
PDACT_KE332589.1_G003510	formate dehydrogenase LENGTH=384	0.59667	1.64987	1.52606	0.0811458	2.29187e-06	1.16171e-05	1	0.000355443	0.00040378
PDACT_KE332549.1_G003680	Serine/threonine protein phosphatase 2A 59 kDa regulatory subunit B' gamma isoform	0.0726507	-1.19432	-1.16912	0.770916	2.49997e-06	4.09206e-06	1	0.000382871	0.000178103
PDACT_KE332558.1_G004480	Co-chaperone GrpE family protein LENGTH=279	0.106436	1.56795	1.37579	0.7457	2.49171e-06	3.35705e-05	1	0.000382871	0.000911986
PDACT_KE332596.1_G000560	UDP-Glycosyltransferase superfamily protein LENGTH=496	0.466938	-2.35986	-2.07824	0.328643	2.55306e-06	2.87241e-05	1	0.000388572	0.000812767
PDACT_KE332728.1_G000260	unknown protein; FUNCTIONS IN: molecular function unknown; INVOLVED IN: biological process unknown; LOCATED IN: chloroplast; EXPRESSED IN: 20 plant structures; EXPRESSED DURING: 13 growth stages; Has 30201 Blast hits to 17322 proteins in 780 species: Archae - 12; Bacteria - 1396; Metazoa - 17338; Fungi - 3422; Plants - 5037; Viruses - 0; Other Eukaryotes - 2996 (source: NCBI BLink). LENGTH=185	-0.01137	1.28277	1.19406	0.966569	2.7774e-06	1.26293e-05	1	0.000420108	0.000427441
PDACT_KE332554.1_G005180	Aspartokinase	-0.0829741	1.9909	1.60678	0.842475	2.94319e-06	0.000140784	1	0.000442454	0.00270995
PDACT_KE332921.1_G000480	Inositol hexakisphosphate and diphosphoinositol-pentakisphosphate kinase	-0.0250863	-1.92038	-2.42269	0.949497	3.10382e-06	9.06952e-09	1	0.000463756	1.53269e-06
PDACT_KE332642.1_G000990	rRNA 2'-O-methyltransferase fibrillarin	0.0145536	1.66869	1.95577	0.9673	3.29065e-06	6.38168e-08	1	0.000485748	6.85645e-06
PDACT_KE332575.1_G000200	GDSL esterase/lipase	-0.345747	-2.52532	-3.33489	0.495893	3.35125e-06	7.98951e-09	1	0.000491731	1.38847e-06
PDACT_KE332708.1_G000740	Ubiquinone/menaquinone biosynthesis C-methyltransferase UbiE	-0.212656	3.25093	2.69495	0.743149	3.60452e-06	8.53777e-05	1	0.000525745	0.0018617
PDACT_KE333105.1_G000350	GDSL esterase/lipase	1.23169	4.27434	4.81783	0.103512	3.70181e-06	4.3565e-07	1	0.00053674	3.19683e-05
PDACT_KE332546.1_G006640	NADH pyrophosphatase	0.188009	-1.74231	-1.46989	0.607359	3.73698e-06	8.40411e-05	1	0.000538653	0.00184199
PDACT_KE332555.1_G000150	Protein of unknown function (DUF789) LENGTH=308	0.479725	2.17049	2.34317	0.291084	3.7603e-06	6.99822e-07	1	0.000538844	4.54866e-05
PDACT_KE332698.1_G002080	Genomic DNA, chromosome 3, BAC clone:F14O13 n=2 Tax=Arabidopsis RepID=Q9LIQ9 ARATH	-0.331764	-1.57121	-1.61889	0.317533	3.98801e-06	2.22108e-06	1	0.000565491	0.000112217
PDACT_KE332780.1_G001140	Protein kinase superfamily protein LENGTH=464	-0.197766	-1.28217	-1.09579	0.469436	4.01089e-06	7.66399e-05	1	0.000565491	0.00171349
PDACT_KE332802.1_G000450	RNA recognition motif (RRM)-containing protein LENGTH=946	-0.113772	1.14577	1.49876	0.644527	4.06134e-06	2.25364e-09	1	0.00056868	4.93064e-07
PDACT_KE332623.1_G002220	TRAM, LAG1 and CLN8 (TLC) lipid-sensing domain containing protein LENGTH=251	0.258985	2.53931	3.17414	0.631629	4.12578e-06	1.83123e-08	1	0.000574421	2.68697e-06
PDACT_KE333063.1_G000470	unknown protein; BEST Arabidopsis thaliana protein match is: unknown protein . LENGTH=567	0.0857145	2.57742	3.17458	0.874645	4.20975e-06	3.09661e-08	1	0.000582801	3.87139e-06
PDACT_KE332565.1_G004780	Methyltransferase-like protein 13	0.650482	2.23236	2.8031	0.17039	4.61964e-06	1.71025e-08	1	0.000635953	2.53988e-06
PDACT_KE332711.1_G000480	P-loop containing nucleoside triphosphate hydrolases superfamily protein LENGTH=500	0.776103	2.53427	-0.0339149	0.142338	4.83889e-06	0.948693	1	0.000662414	0.977413
PDACT_KE332671.1_G000530	Thioredoxin superfamily protein LENGTH=186	0.646043	1.42102	1.4985	0.0354869	4.96688e-06	1.55359e-06	1	0.000676158	8.65211e-05
PDACT_KE332557.1_G004480	GDSL esterase/lipase	-0.754185	3.9787	5.26042	0.0677674	5.20398e-06	2.43681e-08	1	0.000685583	3.28086e-06
PDACT_KE332615.1_G000960	cysteine synthase D1 LENGTH=324	-0.347778	1.21167	1.15492	0.186305	5.14658e-06	1.36548e-05	1	0.000685583	0.000452772
PDACT_KE332564.1_G003130	ubiquitin conjugating enzyme 9 LENGTH=178	0.196142	1.79047	1.67922	0.607245	5.11596e-06	1.78285e-05	1	0.000685583	0.000562976
PDACT_KE332597.1_G001090	Catalase-peroxidase 1	0.741136	1.98239	1.59854	0.0790841	5.1519e-06	0.000199843	1	0.000685583	0.00353316
PDACT_KE332670.1_G001330	Protein of unknown function (DUF569) LENGTH=300	0.324933	-2.34138	-1.59199	0.505946	5.16509e-06	0.00148701	1	0.000685583	0.0155318
PDACT_KE332814.1_G000370	Protein kinase superfamily protein LENGTH=492	-0.124558	-2.62938	-1.31095	0.818337	5.17769e-06	0.0175156	1	0.000685583	0.0873429
PDACT_KE332570.1_G002120	acyl-CoA binding protein 4 LENGTH=669	0.211779	-3.08149	-1.97485	0.733654	5.31252e-06	0.00242229	1	0.00069614	0.0223731
PDACT_KE332641.1_G002790	Regulator of chromosome condensation (RCC1) family protein LENGTH=471	1.05382	3.14185	3.55854	0.103503	5.55139e-06	4.41657e-07	1	0.000718682	3.22094e-05
PDACT_KE332632.1_G000730	unknown protein; FUNCTIONS IN: molecular function unknown; INVOLVED IN: biological process unknown; LOCATED IN: endomembrane system; EXPRESSED IN: 19 plant structures; EXPRESSED DURING: 11 growth stages; Has 15 Blast hits to 15 proteins in 7 species: Archae - 0; Bacteria - 0; Metazoa - 0; Fungi - 0; Plants - 15; Viruses - 0; Other Eukaryotes - 0 (source: NCBI BLink). LENGTH=85	-0.00563376	3.05379	1.0343	0.992832	5.57254e-06	0.101994	1	0.000718682	0.276238
PDACT_KE333328.1_G000240	Suppressor of G2 allele of SKP1 homolog	0.00109138	2.3879	2.10772	0.99826	5.63227e-06	5.23476e-05	1	0.000722581	0.00128562
PDACT_KE333150.1_G000310	purine permease 3 LENGTH=351	-0.813498	-3.94867	-4.16888	0.296667	5.68967e-06	2.25346e-06	1	0.000726144	0.000113619
PDACT_KE332591.1_G000270	BTB/POZ and TAZ domain-containing protein 3	0.088001	-1.85724	-1.93153	0.824242	5.76225e-06	2.58341e-06	1	0.000731597	0.000126861
PDACT_KE333246.1_G000600	Zinc finger protein CONSTANS-LIKE 10	-0.121505	-2.32745	-1.79123	0.803815	6.07649e-06	0.00039488	1	0.000767517	0.00585582
PDACT_KE332670.1_G000920	23S rRNA (guanosine-2'-O-)-methyltransferase RlmB	0.320327	1.47519	1.76612	0.321144	6.48736e-06	8.46398e-08	1	0.000806082	8.6364e-06
PDACT_KE332571.1_G000840	U-box domain-containing protein 13	0.0125347	-1.11753	-1.31014	0.959068	6.48502e-06	1.48133e-07	1	0.000806082	1.35949e-05
PDACT_KE332545.1_G001040	phosphoenolpyruvate carboxylase 1 LENGTH=967	-0.347782	-1.46771	-2.71688	0.276194	6.64204e-06	1.53341e-15	1	0.000817872	2.21027e-12
PDACT_KE332901.1_G000960	Ribonuclease P protein subunit P38-related LENGTH=720	-0.648234	-2.26753	-3.02864	0.178068	6.74172e-06	5.95483e-09	1	0.000819284	1.11387e-06
PDACT_KE332633.1_G001510	gigantea protein (GI) LENGTH=1173	-0.322367	-1.84276	-1.65767	0.416792	6.75381e-06	4.6543e-05	1	0.000819284	0.00118063
PDACT_KE332611.1_G000530	Elongation factor 1-alpha	0.0930723	1.53722	0.799277	0.780606	6.79829e-06	0.0174286	1	0.000820617	0.0870504
PDACT_KE332772.1_G001450	Testis-specific Y-encoded-like protein 4	0.304543	1.23601	1.07781	0.262756	7.04341e-06	8.53961e-05	1	0.000844311	0.0018617
PDACT_KE332783.1_G000630	unknown protein; Has 2631 Blast hits to 1984 proteins in 271 species: Archae - 6; Bacteria - 163; Metazoa - 1232; Fungi - 253; Plants - 141; Viruses - 8; Other Eukaryotes - 828 (source: NCBI BLink). LENGTH=388	-0.238503	-3.43291	-2.44381	0.733959	7.06349e-06	0.00103972	1	0.000844311	0.0119443
PDACT_KE332962.1_G000230	Phospholipase A-2-activating protein	-0.414586	-1.18431	-1.0964	0.110888	7.18495e-06	3.25355e-05	1	0.00085466	0.000893626
PDACT_KE332672.1_G000810	beta-ureidopropionase LENGTH=408	-0.0378823	1.29016	1.68709	0.893973	7.2475e-06	6.35388e-09	1	0.000857936	1.17064e-06
PDACT_KE332605.1_G003410	Protein phosphatase 2C family protein LENGTH=357	-0.246188	-1.71109	-1.48099	0.506847	7.3176e-06	9.38159e-05	1	0.00086207	0.00199554
PDACT_KE332556.1_G003000	unknown protein; LOCATED IN: chloroplast; EXPRESSED IN: 24 plant structures; EXPRESSED DURING: 15 growth stages; BEST Arabidopsis thaliana protein match is: unknown protein . LENGTH=386	-0.2906	-1.40941	-1.39063	0.346791	7.5082e-06	9.86697e-06	1	0.0008761	0.000356083
PDACT_KE332798.1_G000870	unknown protein; Has 38 Blast hits to 36 proteins in 11 species: Archae - 0; Bacteria - 0; Metazoa - 0; Fungi - 2; Plants - 32; Viruses - 0; Other Eukaryotes - 4 (source: NCBI BLink). LENGTH=771	-0.0216727	-1.37987	-1.9042	0.942858	7.70331e-06	1.30515e-09	1	0.000894607	3.0462e-07
PDACT_KE333097.1_G000530	Unknown protein	0.214855	-3.44341	-3.26007	0.759187	7.77277e-06	2.4854e-05	1	0.000898414	0.000728495
PDACT_KE333048.1_G000520	Protein of unknown function (DUF506) LENGTH=291	0.14906	1.46947	2.00182	0.64475	8.26376e-06	2.28546e-09	1	0.000946239	4.95601e-07
PDACT_KE332669.1_G000840	Eukaryotic aspartyl protease family protein LENGTH=474	-0.355226	1.85783	2.20117	0.379878	8.44638e-06	1.84104e-07	1	0.000962651	1.59975e-05
PDACT_KE332872.1_G000430	U-box domain-containing protein 43	-0.288628	-1.35074	-1.31883	0.332662	8.81714e-06	1.44479e-05	1	0.000995646	0.000473645
PDACT_KE333762.1_G000240	DNA replication licensing factor MCM3 homolog 2	0.496739	-2.28666	-1.48663	0.303466	9.05238e-06	0.00298253	1	0.00101425	0.0258848
PDACT_KE332805.1_G000830	AT hook motif DNA-binding family protein LENGTH=334	-0.268826	-1.56197	-1.33213	0.433353	9.16817e-06	0.000141616	1	0.00101655	0.00271744
PDACT_KE333424.1_G000140	Peptide methionine sulfoxide reductase MsrB	-0.158042	-1.396	-1.13406	0.60833	9.14263e-06	0.000288944	1	0.00101655	0.00466752
PDACT_KE333691.1_G000130	RNA-binding protein 1 LENGTH=360	-0.0294919	-1.07964	-1.22101	0.902217	9.29151e-06	6.14139e-07	1	0.00102558	4.18024e-05
PDACT_KE332798.1_G001180	trehalose-6-phosphate synthase LENGTH=942	-0.0702367	-1.6601	-2.66808	0.847173	9.58415e-06	8.14218e-12	1	0.00104844	4.86624e-09
PDACT_KE332679.1_G001000	unknown protein; Has 51 Blast hits to 51 proteins in 13 species: Archae - 0; Bacteria - 0; Metazoa - 0; Fungi - 0; Plants - 51; Viruses - 0; Other Eukaryotes - 0 (source: NCBI BLink). LENGTH=141	0.419895	3.07388	2.0777	0.516234	9.64035e-06	0.00198042	1	0.0010499	0.0192649
PDACT_KE332736.1_G000550	PHD finger protein LENGTH=127	0.334084	4.42167	4.63712	0.252395	9.79709e-06	5.79272e-06	1	0.00106225	0.000233078
PDACT_KE334867.1_G000160	exostosin family protein LENGTH=793	-0.279719	1.52543	1.59149	0.41432	9.96749e-06	4.25627e-06	1	0.00106959	0.000183296
PDACT_KE332566.1_G001140	Ubiquitin-like domain-containing CTD phosphatase	-0.140779	-1.33392	-1.20623	0.634802	9.99571e-06	6.21534e-05	1	0.00106959	0.00146302
PDACT_KE332988.1_G000440	Pentatricopeptide repeat-containing protein	-0.212666	1.80403	1.54576	0.595323	9.93595e-06	0.000138657	1	0.00106959	0.00267743
PDACT_KE332647.1_G002410	Heavy metal transport/detoxification superfamily protein LENGTH=157	0.117741	-4.36631	-4.36631	0.912713	1.03248e-05	1.72096e-05	1	0.00109999	0.000548573
PDACT_KE332597.1_G000870	Type 2 DNA topoisomerase 6 subunit A	0.26914	-1.61699	-2.07981	0.449863	1.04474e-05	2.73256e-08	1	0.00110824	3.54279e-06
PDACT_KE332929.1_G000240	Demethylmenaquinone methyltransferase	0.267384	-1.44466	-1.68079	0.405417	1.05712e-05	3.63533e-07	1	0.00111654	2.76647e-05
PDACT_KE332673.1_G000730	unknown protein; Has 30201 Blast hits to 17322 proteins in 780 species: Archae - 12; Bacteria - 1396; Metazoa - 17338; Fungi - 3422; Plants - 5037; Viruses - 0; Other Eukaryotes - 2996 (source: NCBI BLink). LENGTH=159	-0.448954	-1.28762	-1.46564	0.119092	1.06841e-05	6.21656e-07	1	0.00112362	4.18491e-05
PDACT_KE332944.1_G000170	GDP-L-galactose phosphorylase 2	0.230149	-1.87221	-2.06394	0.575377	1.12156e-05	1.61637e-06	1	0.00117447	8.96098e-05
PDACT_KE332634.1_G000400	Oxygen-evolving enhancer protein 2, chloroplastic	0.284087	1.99735	2.23432	0.517679	1.14374e-05	1.12909e-06	1	0.00119261	6.74808e-05
PDACT_KE332822.1_G000300	Protein of unknown function (DUF567) LENGTH=196	0.704928	-2.44032	-2.9896	0.184188	1.19622e-05	1.60287e-07	1	0.0012368	1.44399e-05
PDACT_KE332574.1_G003390	Homeobox-leucine zipper protein family LENGTH=294	0.12794	1.37045	1.44241	0.679571	1.27435e-05	4.58236e-06	1	0.00131204	0.000194941
PDACT_KE332854.1_G000120	BRI1 kinase inhibitor 1 LENGTH=337	0.550716	2.42691	3.0307	0.311778	1.29279e-05	9.60326e-08	1	0.00131446	9.48864e-06
PDACT_KE332554.1_G006690	Mannose-1-phosphate guanyltransferase	-0.202331	1.26464	1.02821	0.479468	1.28502e-05	0.000365741	1	0.00131446	0.0055372
PDACT_KE333214.1_G000190	response regulator 1 LENGTH=690	-0.481288	-1.282	-0.847	0.0967004	1.28939e-05	0.00364062	1	0.00131446	0.0297069
PDACT_KE332655.1_G002080	RHOMBOID-like 2 LENGTH=317	0.72639	1.88657	1.52246	0.0889657	1.31065e-05	0.000402958	1	0.00132711	0.00592682
PDACT_KE332688.1_G000750	Alanine--tRNA ligase	-0.368389	-1.43788	-1.31622	0.255848	1.34421e-05	6.433e-05	1	0.0013555	0.00150271
PDACT_KE332565.1_G004800	S-adenosyl-L-methionine-dependent methyltransferases superfamily protein LENGTH=252	0.795165	1.83353	2.20011	0.0544513	1.3691e-05	2.49153e-07	1	0.00137493	2.01493e-05
PDACT_KE332938.1_G000470	alpha-galactosidase 2 LENGTH=396	0.30051	1.37683	2.20953	0.336426	1.39764e-05	1.03071e-11	1	0.00139787	5.87358e-09
PDACT_KE332607.1_G002770	Transducin/WD40 repeat-like superfamily protein LENGTH=317	0.513146	1.87456	2.08536	0.22404	1.43091e-05	1.63025e-06	1	0.00142043	9.01754e-05
PDACT_KE332587.1_G002890	unknown protein; BEST Arabidopsis thaliana protein match is: unknown protein . LENGTH=357	-1.21298	-3.95963	-3.24377	0.146798	1.43179e-05	0.000295667	1	0.00142043	0.00473531
PDACT_KE332560.1_G003780	kinesin 4 LENGTH=987	0.489931	-3.85906	-4.04382	0.54302	1.4414e-05	8.72533e-06	1	0.00142419	0.000325923
PDACT_KE332625.1_G002050	Zinc finger protein VAR3, chloroplastic	0.185408	1.28658	1.29561	0.526947	1.47194e-05	1.29396e-05	1	0.00144287	0.000434344
PDACT_KE333466.1_G000110	S-adenosyl-L-methionine-dependent methyltransferases superfamily protein LENGTH=379	0	7.58934	1.71577	1	1.47207e-05	0.0233862	1	0.00144287	0.105945
PDACT_KE332564.1_G004050	Pentatricopeptide repeat-containing protein	-0.114654	1.61967	1.57911	0.75558	1.49145e-05	2.3891e-05	1	0.00145517	0.000705332
PDACT_KE332570.1_G001920	3-oxoacyl-[acyl-carrier-protein] synthase 2	-0.0284891	1.17564	0.792465	0.915648	1.4965e-05	0.00333672	1	0.00145517	0.0280068
PDACT_KE333936.1_G000170	PF07386 family protein n=3 Tax=Leptospira RepID=S3V157 9LEPT	-0.565718	-1.43965	-1.56547	0.0839287	1.5678e-05	2.94621e-06	1	0.00150006	0.000140182
PDACT_KE332633.1_G002030	Polyadenylate-binding protein 5	-0.473593	-1.81382	-1.9641	0.245923	1.57121e-05	3.27192e-06	1	0.00150006	0.000150705
PDACT_KE333051.1_G000160	Protein kinase family protein LENGTH=676	0.00360118	-1.17253	-1.2047	0.989263	1.5572e-05	9.2447e-06	1	0.00150006	0.00033912
PDACT_KE332579.1_G003920	NAD(P)-binding Rossmann-fold superfamily protein LENGTH=304	0.281484	-1.73887	-1.72809	0.47106	1.57328e-05	1.82721e-05	1	0.00150006	0.00057329
PDACT_KE332555.1_G000850	Cleavage and polyadenylation specificity factor subunit 5	0.382734	1.59154	2.11371	0.294459	1.59638e-05	1.61369e-08	1	0.00151619	2.41109e-06
PDACT_KE332586.1_G003760	2-oxoglutarate (2OG) and Fe(II)-dependent oxygenase superfamily protein LENGTH=324	0.371089	3.02702	2.75923	0.570909	1.64565e-05	7.53923e-05	1	0.00155411	0.00169483
PDACT_KE333937.1_G000180	unknown protein; FUNCTIONS IN: molecular function unknown; INVOLVED IN: biological process unknown; LOCATED IN: chloroplast; EXPRESSED IN: 23 plant structures; EXPRESSED DURING: 13 growth stages;	0.837796	1.88018	2.83703	0.0494869	1.70551e-05	3.80325e-10	1	0.00160122	1.05903e-07
PDACT_KE332548.1_G002740	pentatricopeptide repeat 336 LENGTH=408	-0.13961	-1.18511	-1.31326	0.608491	1.83032e-05	2.26499e-06	1	0.00170533	0.000113966
PDACT_KE332638.1_G000450	auxin response factor 17 LENGTH=585	-0.272453	-1.85583	-2.13928	0.514302	1.84399e-05	1.17174e-06	1	0.00170558	6.95216e-05
PDACT_KE332904.1_G000640	Protein kinase superfamily protein LENGTH=337	-0.257508	-2.72059	-3.96666	0.664158	1.8674e-05	5.76958e-09	1	0.00172025	1.08752e-06
PDACT_KE332575.1_G002040	31-kDa RNA binding protein LENGTH=329	0.424945	1.64138	3.09346	0.257801	1.95919e-05	2.524e-14	1	0.00179585	2.70421e-11
PDACT_KE332589.1_G001740	Dihydroxyacetone kinase LENGTH=593	0.0383781	-1.09564	-1.18842	0.879409	1.96412e-05	3.99977e-06	1	0.00179585	0.000174707
PDACT_KE332623.1_G002410	Protein kinase superfamily protein LENGTH=557	0.227689	-1.30655	-1.02685	0.447874	1.98491e-05	0.000748898	1	0.00180812	0.00935677
PDACT_KE332890.1_G000200	Glutathione-regulated potassium-efflux system protein	-0.371469	-1.10444	-0.880521	0.146708	1.99644e-05	0.000641463	1	0.00181188	0.00843701
PDACT_KE333269.1_G000400	Heat stress transcription factor A-2b	0.463698	2.53853	2.78511	0.416339	2.02083e-05	3.66488e-06	1	0.00182725	0.000163578
PDACT_KE332562.1_G002320	Protein kinase superfamily protein LENGTH=720	-0.170792	-1.90379	-0.857374	0.692034	2.03449e-05	0.0486606	1	0.00183284	0.171799
PDACT_KE332567.1_G003500	Zinc finger CCCH domain-containing protein 11	0.269739	1.1167	1.16747	0.300117	2.0439e-05	8.71066e-06	1	0.00183457	0.000325872
PDACT_KE332558.1_G004490	Protein GrpE	-0.146856	1.39632	1.07871	0.650082	2.16212e-05	0.000954349	1	0.00192657	0.011216
PDACT_KE332724.1_G000190	RING-H2 finger protein 2B LENGTH=147	-0.559084	2.06545	4.7803	0.238615	2.21247e-05	2.31813e-18	1	0.00194428	7.10044e-15
PDACT_KE332952.1_G000220	DNA replication licensing factor MCM3 homolog	-0.0840508	-2.46278	-2.41346	0.87733	2.21374e-05	3.82269e-05	1	0.00194428	0.00101376
PDACT_KE333038.1_G000580	NC domain-containing protein-related LENGTH=260	0.345966	1.53591	1.1504	0.33351	2.19976e-05	0.00138508	1	0.00194428	0.0147694
PDACT_KE332557.1_G002820	ABC transporter G family member 31	-1.67115	-4.68348	-2.88296	0.167806	2.26495e-05	0.0194069	1	0.00198216	0.0936232
PDACT_KE332725.1_G001370	Armadillo/beta-catenin repeat protein-like n=3 Tax=Oryza RepID=Q655G2 ORYSJ	-0.432903	-2.50272	-2.85078	0.436928	2.28158e-05	2.90036e-06	1	0.0019896	0.000138809
PDACT_KE332712.1_G000410	DNA-directed RNA polymerase subunit K	0.107245	1.41653	1.3279	0.744891	2.30919e-05	7.05872e-05	1	0.00200654	0.00161802
PDACT_KE333088.1_G000760	gibberellin 2-oxidase LENGTH=341	1.63431	-4.22739	-1.96273	0.0709473	2.32148e-05	0.0316152	1	0.00201009	0.129285
PDACT_KE332572.1_G002320	sugar transporter protein 7 LENGTH=513	-0.0976727	-1.86253	-2.49114	0.818431	2.36027e-05	3.56458e-08	1	0.00201519	4.30278e-06
PDACT_KE332659.1_G000590	Small subunit processome component 20 homolog	-0.0365338	1.28158	1.28954	0.902906	2.35467e-05	2.11565e-05	1	0.00201519	0.000642958
PDACT_KE333272.1_G000420	Aldo-keto reductase	1.34603	3.16709	3.10373	0.0551847	2.34712e-05	3.25665e-05	1	0.00201519	0.000893626
PDACT_KE333068.1_G000570	B12D protein LENGTH=87	0.345933	-1.78891	-2.08556	0.395144	2.42171e-05	1.29584e-06	1	0.00206047	7.52449e-05
PDACT_KE332549.1_G006540	Anthranilate synthase	0.662627	1.62976	2.18681	0.0806139	2.45264e-05	2.65974e-08	1	0.0020724	3.46672e-06
PDACT_KE333255.1_G000220	Aluminum resistance family protein n=2 Tax=Oscillatoriales RepID=K9VKU4 9CYAN	0.0421069	-1.32535	-1.43779	0.891281	2.45053e-05	5.1327e-06	1	0.0020724	0.000212094
PDACT_KE332979.1_G000410	Protein phosphatase 2C family protein LENGTH=423	-0.0813555	-1.42028	-0.730624	0.805473	2.49038e-05	0.0278442	1	0.00209705	0.119387
PDACT_KE332692.1_G001510	Cytochrome P450 superfamily protein LENGTH=513	0.348383	3.05763	1.80091	0.604872	2.56384e-05	0.0093098	1	0.00215152	0.0567199
PDACT_KE333794.1_G000110	Ribonuclease 3	0.393373	1.94568	2.12577	0.381461	2.61523e-05	4.9905e-06	1	0.00217971	0.000207266
PDACT_KE332843.1_G000760	UDP-Glycosyltransferase superfamily protein LENGTH=442	-0.674703	-1.8367	-1.48246	0.11195	2.66448e-05	0.000617109	1	0.00220046	0.00821829
PDACT_KE332567.1_G001610	Pentatricopeptide repeat-containing protein	-0.142642	1.44234	1.16312	0.672225	2.67463e-05	0.000652601	1	0.00220046	0.00851056
PDACT_KE332599.1_G000500	WD repeat-containing protein 5	0.145215	-3.45256	-2.48644	0.84596	2.67593e-05	0.00164394	1	0.00220046	0.0167288
PDACT_KE332572.1_G002530	Ethylene-responsive transcription factor 4	0.593082	-2.97683	-1.6035	0.368596	2.67605e-05	0.0176011	1	0.00220046	0.0876086
PDACT_KE332666.1_G001390	unknown protein; BEST Arabidopsis thaliana protein match is: unknown protein . LENGTH=182	0.851166	2.53628	2.85614	0.147431	2.76905e-05	3.14213e-06	1	0.00226933	0.000146657
PDACT_KE333107.1_G000530	Developmentally-regulated GTP-binding protein 1 homolog	0.5304	1.19004	1.429	0.0596835	2.78298e-05	5.64489e-07	1	0.00227229	3.94081e-05
PDACT_KE332824.1_G000510	unknown protein; Has 30201 Blast hits to 17322 proteins in 780 species: Archae - 12; Bacteria - 1396; Metazoa - 17338; Fungi - 3422; Plants - 5037; Viruses - 0; Other Eukaryotes - 2996 (source: NCBI BLink). LENGTH=997	0.160198	-3.66616	-2.72307	0.842596	2.79122e-05	0.00150667	1	0.00227229	0.0156837
PDACT_KE332814.1_G000970	sterol methyltransferase 1 LENGTH=336	-1.17145	-3.40102	-5.61812	0.118622	2.84306e-05	5.68208e-10	1	0.00229187	1.49714e-07
PDACT_KE332741.1_G000340	Pyruvate, phosphate dikinase regulatory protein 2	0.340145	-1.83926	-1.88131	0.421885	2.8248e-05	2.05021e-05	1	0.00229187	0.000628766
PDACT_KE332601.1_G001850	Syntaxin/t-SNARE family protein LENGTH=300	0.266274	-1.31226	-0.359445	0.387109	2.84332e-05	0.243901	1	0.00229187	0.474593
PDACT_KE332717.1_G000800	Protein of unknown function (DUF399 and DUF3411) LENGTH=735	-0.0807641	-1.44717	-1.44535	0.812143	3.05381e-05	3.16958e-05	1	0.00242957	0.000877598
PDACT_KE332856.1_G000390	GATA transcription factor 4 LENGTH=240	0.33338	2.01227	2.76984	0.486447	3.08184e-05	2.09575e-08	1	0.00244393	2.93453e-06
PDACT_KE332560.1_G000360	cytochrome B5-like protein LENGTH=121	-0.0717248	-2.80173	-3.79919	0.909004	3.10404e-05	8.52926e-08	1	0.0024536	8.6364e-06
PDACT_KE334139.1_G000140	Expressed protein n=1 Tax=Oryza sativa subsp. japonica RepID=Q10RE8 ORYSJ	0.425243	1.84302	2.50116	0.324701	3.11465e-05	3.25406e-08	1	0.00245407	3.96704e-06
PDACT_KE332629.1_G001580	Peptidyl-prolyl cis-trans isomerase	0.380975	1.21205	1.76386	0.186136	3.19471e-05	2.43469e-09	1	0.00250794	5.18778e-07
PDACT_KE332651.1_G000320	receptor-like kinase 1 LENGTH=655	0.202335	-1.92964	-2.79628	0.649238	3.2576e-05	8.47011e-09	1	0.00253579	1.46163e-06
PDACT_KE333493.1_G000200	Oxygen-evolving enhancer protein 3-1, chloroplastic	-0.00720115	1.55648	1.68105	0.984315	3.25977e-05	7.7959e-06	1	0.00253579	0.000298485
PDACT_KE332661.1_G001320	WD-40 repeat family protein LENGTH=613	0.333319	-2.5128	-1.79188	0.559732	3.28242e-05	0.00236931	1	0.00254533	0.0219832
PDACT_KE332865.1_G001000	WRKY family transcription factor family protein LENGTH=557	0.0534158	-1.08806	-0.849469	0.83621	3.31046e-05	0.00114044	1	0.00255093	0.0127896
PDACT_KE332851.1_G000530	alpha-L-fucosidase 1 LENGTH=506	-0.155486	-1.45765	-1.25707	0.650256	3.36114e-05	0.000336415	1	0.00258186	0.00519767
PDACT_KE332722.1_G001510	Protein ULTRAPETALA 1	0.0854381	-1.56814	-2.50052	0.816911	3.39682e-05	1.68478e-10	1	0.00259167	5.81463e-08
PDACT_KE332760.1_G000250	Fatty acid desaturase 1	0.0313844	-1.84179	-2.80421	0.94188	3.41621e-05	1.19211e-09	1	0.00259167	2.83606e-07
PDACT_KE332554.1_G001840	Kelch repeat-containing F-box family protein LENGTH=478	0.0243041	-2.08885	-1.3456	0.959955	3.3878e-05	0.00630531	1	0.00259167	0.0433395
PDACT_KE332545.1_G005160	BURP domain-containing protein LENGTH=392	1.5555	6.90265	8.20176	0.236002	3.4399e-05	3.31842e-06	1	0.00259358	0.000152275
PDACT_KE333064.1_G000130	ATP phosphoribosyltransferase	0.209763	1.18953	1.16528	0.461481	3.47544e-05	5.02534e-05	1	0.00261234	0.00125016
PDACT_KE332599.1_G004160	Protein kinase superfamily protein LENGTH=775	-0.12391	-1.04302	-0.905046	0.619309	3.64464e-05	0.000332341	1	0.00272281	0.00514771
PDACT_KE332594.1_G000890	Cytokinin riboside 5'-monophosphate phosphoribohydrolase LOG	-1.1275	-4.46145	-4.80445	0.246008	3.70445e-05	1.34698e-05	1	0.00275908	0.000449065
PDACT_KE332549.1_G003880	RING/U-box superfamily protein LENGTH=145	0.33718	-3.55363	-3.11201	0.702505	3.80945e-05	0.000515383	1	0.00282014	0.00715962
PDACT_KE332558.1_G000990	Cytochrome b-c1 complex subunit 6	0.331239	1.34474	0.743751	0.305837	3.80791e-05	0.0217665	1	0.00282014	0.101286
PDACT_KE332667.1_G000340	WD-40 repeat family protein LENGTH=613	0.423174	1.33285	1.80435	0.186934	3.85031e-05	3.71059e-08	1	0.00284181	4.43533e-06
PDACT_KE333117.1_G000660	purple acid phosphatase 16 LENGTH=367	0.549615	1.46358	1.442	0.119119	3.96887e-05	5.23609e-05	1	0.00292052	0.00128562
PDACT_KE332709.1_G000900	Esterase/lipase/thioesterase family protein LENGTH=704	0.213424	-1.37462	-1.4197	0.516334	4.05232e-05	2.30599e-05	1	0.002973	0.000684949
PDACT_KE333138.1_G000440	cytochrome P450, family 78, subfamily A, polypeptide 5 LENGTH=517	0.212197	-3.41887	-4.10284	0.779884	4.07359e-05	1.98797e-06	1	0.00297968	0.000103866
PDACT_KE332574.1_G000490	cytomatrix protein-related LENGTH=342	-0.312301	-1.78533	-1.43583	0.458218	4.09842e-05	0.000864123	1	0.00298892	0.0103695
PDACT_KE332938.1_G000390	Nucleotide/sugar transporter family protein LENGTH=353	-0.293416	-1.68817	-1.88437	0.462635	4.17998e-05	5.98322e-06	1	0.00303936	0.000238395
PDACT_KE332898.1_G000990	SKP1-like 11 LENGTH=152	-0.742039	-2.11685	-2.46867	0.13676	4.2725e-05	2.54021e-06	1	0.00305229	0.00012568
PDACT_KE333943.1_G000150	polyadenylate-binding protein 1 LENGTH=265	0.162322	1.0672	1.17832	0.531056	4.25976e-05	6.59373e-06	1	0.00305229	0.000258516
PDACT_KE332572.1_G003890	Amine oxidase [flavin-containing] A	0.572527	3.28031	3.38404	0.431784	4.24814e-05	2.65433e-05	1	0.00305229	0.000767747
PDACT_KE332921.1_G000160	5'-AMP-activated protein kinase-related LENGTH=532	0.095619	1.45652	1.70249	0.785771	4.35608e-05	2.06502e-06	1	0.00310295	0.000106305
PDACT_KE332718.1_G001270	Calcineurin-like metallo-phosphoesterase superfamily protein LENGTH=1015	0.3283	2.67123	2.76199	0.602416	4.40511e-05	2.65806e-05	1	0.00312878	0.000767747
PDACT_KE332546.1_G008000	Ribonuclease T2 family protein LENGTH=228	1.19662	3.96943	5.22597	0.171526	4.52189e-05	4.24897e-07	1	0.00320244	3.16739e-05
PDACT_KE332682.1_G001430	Prostamide/prostaglandin F synthase	-0.197569	-1.60865	-1.02221	0.607389	4.55766e-05	0.00857237	1	0.00321847	0.0536134
PDACT_KE332588.1_G000640	RING/U-box superfamily protein LENGTH=306	0.320189	-3.54271	-3.14724	0.694914	4.61815e-05	0.000307968	1	0.00324249	0.00487612
PDACT_KE334157.1_G000160	Ribonuclease H-like superfamily protein LENGTH=484	0.331464	3.57738	1.53497	0.66613	4.67978e-05	0.0562144	1	0.00327638	0.189059
PDACT_KE332557.1_G001720	HIT zinc finger ;PAPA-1-like conserved region LENGTH=532	-0.228031	-1.08566	-1.00409	0.386631	4.72071e-05	0.000166421	1	0.00329562	0.00306847
PDACT_KE332629.1_G000440	Ubiquitin carboxyl-terminal hydrolase 2	0.131465	1.29863	0.616102	0.677158	4.86942e-05	0.0516139	1	0.00338978	0.17894
PDACT_KE332900.1_G000380	myb domain protein 40 LENGTH=263	0.0405179	-3.25684	-3.68642	0.956127	4.97203e-05	7.46356e-06	1	0.00344166	0.000288465
PDACT_KE332582.1_G003230	annexin 8 LENGTH=316	0.712732	4.58804	2.65607	0.266781	5.02099e-05	0.00410064	1	0.00345602	0.0321646
PDACT_KE333391.1_G000210	cycloartenol synthase 1 LENGTH=759	-0.485925	-2.56917	-1.77552	0.416107	5.12277e-05	0.00406773	1	0.0035162	0.0319986
PDACT_KE332545.1_G007130	auxin response factor 9 LENGTH=638	-0.0298623	-1.50736	-0.987956	0.934658	5.18893e-05	0.00726459	1	0.00355166	0.0478723
PDACT_KE332891.1_G000490	phosphate transporter 1;4 LENGTH=534	-0.381304	-1.51369	-3.21943	0.298818	5.35141e-05	8.22995e-16	1	0.0036332	1.34444e-12
PDACT_KE332809.1_G000500	TRICHOME BIREFRINGENCE-LIKE 33 LENGTH=425	-0.123097	-1.57202	-2.04954	0.746034	5.38164e-05	2.19332e-07	1	0.0036332	1.83431e-05
PDACT_KE332565.1_G002160	Phospholipase A1-II 6	-0.296922	2.3461	2.72414	0.598137	5.39329e-05	3.82108e-06	1	0.0036332	0.000168706
PDACT_KE332838.1_G001070	UPI0003D786CB related cluster n=3 Tax=unknown RepID=UPI0003D786CB	0.193747	-3.62055	-1.61574	0.811221	5.37463e-05	0.0518329	1	0.0036332	0.179232
PDACT_KE332615.1_G000330	flavanone 3-hydroxylase LENGTH=358	0.35364	-2.64456	-2.62455	0.566451	5.46421e-05	6.70076e-05	1	0.00366836	0.00155635
PDACT_KE332823.1_G000920	Acyl-CoA N-acyltransferases (NAT) superfamily protein LENGTH=188	-0.0742666	-1.59393	-2.38859	0.847335	5.56529e-05	4.28782e-09	1	0.00371586	8.54217e-07
PDACT_KE332736.1_G000310	RNA binding protein PDE312 n=6 Tax=Brassicaceae RepID=F4JF21 ARATH	-0.158029	1.56851	1.67661	0.678522	5.63127e-05	1.77247e-05	1	0.00374969	0.000560421
PDACT_KE332676.1_G001280	Protein NRT1/ PTR FAMILY 6.1	-0.108808	1.24049	0.992691	0.720854	5.81761e-05	0.00122693	1	0.00385283	0.0135305
PDACT_KE332720.1_G000610	myb-like transcription factor family protein LENGTH=357	0.112021	1.52003	2.11877	0.763961	5.84908e-05	3.68334e-08	1	0.00386323	4.42434e-06
PDACT_KE332718.1_G001050	Peroxidase superfamily protein LENGTH=639	0.868335	4.66123	4.00915	0.0754655	5.89879e-05	0.000188373	1	0.00388559	0.00338409
PDACT_KE333795.1_G000220	Argonaute family protein LENGTH=997	0.149609	-1.53991	-2.58702	0.689704	5.99267e-05	8.75002e-11	1	0.00393685	3.45823e-08
PDACT_KE332609.1_G003010	Protein of unknown function (DUF1685) LENGTH=189	-0.158156	-1.48807	-1.73268	0.662895	6.01737e-05	3.56569e-06	1	0.00393893	0.000160909
PDACT_KE332622.1_G002300	Cryptochrome-1	0.339957	-1.57652	-1.54357	0.376039	6.02799e-05	8.49107e-05	1	0.00393893	0.00185607
PDACT_KE332794.1_G000700	alpha/beta-Hydrolases superfamily protein LENGTH=382	-0.324173	-1.87472	-2.18283	0.471587	6.14275e-05	4.72368e-06	1	0.00399807	0.000199773
PDACT_KE332981.1_G000610	Alcohol dehydrogenase	1.28113	3.09391	0.88555	0.076995	6.15113e-05	0.217907	1	0.00399807	0.443451
PDACT_KE332687.1_G000710	unknown protein; Has 35333 Blast hits to 34131 proteins in 2444 species: Archae - 798; Bacteria - 22429; Metazoa - 974; Fungi - 991; Plants - 531; Viruses - 0; Other Eukaryotes - 9610 (source: NCBI BLink). LENGTH=453	-0.000261086	-1.30998	-1.23895	0.999352	6.17008e-05	0.000148957	1	0.00399978	0.00283168
PDACT_KE332864.1_G000580	Protein phosphatase 2C family protein LENGTH=400	-0.0183201	-1.30532	-1.11017	0.954359	6.2297e-05	0.000628283	1	0.00402777	0.00832637
PDACT_KE332877.1_G000880	Rab3 GTPase-activating protein catalytic subunit (Fragments)	-0.105626	-1.24833	-0.702665	0.730204	6.35676e-05	0.0228972	1	0.00408835	0.104522
PDACT_KE333677.1_G000210	Cytochrome P450 superfamily protein LENGTH=520	0.317214	2.87341	4.2674	0.636254	6.38727e-05	2.46843e-08	1	0.00409476	3.29731e-06
PDACT_KE332724.1_G001580	MADS-box transcription factor family protein LENGTH=260	1.75681	-2.95411	-2.95411	0.0528134	6.40323e-05	0.000115599	1	0.00409476	0.00235268
PDACT_KE332613.1_G002680	Pollen Ole e 1 allergen and extensin family protein LENGTH=267	0.121629	-3.36303	-2.58681	0.876644	6.42467e-05	0.00177919	1	0.00409476	0.0177547
PDACT_KE332656.1_G001490	Pentatricopeptide repeat-containing protein	-0.0154442	1.24986	0.930927	0.960162	6.43358e-05	0.00276105	1	0.00409476	0.0244927
PDACT_KE332549.1_G005080	Glucose-induced degradation protein 8 homolog	0.178939	1.7438	1.62735	0.675843	6.47782e-05	0.00018773	1	0.00411224	0.00337748
PDACT_KE332546.1_G009000	Choline/ethanolamine kinase	0.0688017	-1.24902	-1.31609	0.822994	6.52914e-05	2.7182e-05	1	0.00413411	0.000779937
PDACT_KE338477.1_G000110	n=1 Tax=Oryza sativa subsp. japonica RepID=Q7XLR4 ORYSJ	0.134086	-3.30815	-0.906084	0.8609	6.5598e-05	0.241188	1	0.00414282	0.471523
PDACT_KE333471.1_G000240	Protein of unknown function (DUF668) LENGTH=474	0.0953373	-2.04573	-3.423	0.846597	6.6042e-05	3.22434e-10	1	0.00416013	9.91876e-08
PDACT_KE332809.1_G000830	PRA1 (Prenylated rab acceptor) family protein LENGTH=189	-0.045576	-1.28653	-1.39516	0.885459	6.66741e-05	1.70372e-05	1	0.00418919	0.000545726
PDACT_KE332826.1_G000550	alpha/beta-Hydrolases superfamily protein LENGTH=350	0.572213	2.69394	3.90315	0.371833	6.8308e-05	4.33168e-08	1	0.00422503	5.00293e-06
PDACT_KE332655.1_G000440	RING/U-box superfamily protein LENGTH=340	0.519366	1.27989	1.59724	0.101854	6.8394e-05	8.29758e-07	1	0.00422503	5.24031e-05
PDACT_KE332575.1_G004840	RHOMBOID-like 1 LENGTH=389	0.340949	2.95678	3.33184	0.613743	6.79081e-05	1.05073e-05	1	0.00422503	0.00037697
PDACT_KE332571.1_G003890	Pyruvate kinase family protein LENGTH=596	-0.26604	-1.2092	-1.29805	0.374092	6.84516e-05	2.03821e-05	1	0.00422503	0.000625867
PDACT_KE333137.1_G000320	phosphoenolpyruvate carboxylase 1 LENGTH=967	0.15974	-2.96976	-2.75301	0.81767	6.8115e-05	0.000197733	1	0.00422503	0.00350344
PDACT_KE332776.1_G001110	Unknown protein	1.09766	-3.07641	-2.32529	0.135238	6.81768e-05	0.00245955	1	0.00422503	0.0226139
PDACT_KE333097.1_G000140	purine permease 11 LENGTH=379	0.178698	-2.18038	-0.48866	0.732987	6.83303e-05	0.352093	1	0.00422503	0.585007
PDACT_KE332545.1_G002360	ketol-acid reductoisomerase LENGTH=591	-0.396648	1.28908	0.790407	0.214646	6.88331e-05	0.0137476	1	0.0042379	0.073917
PDACT_KE333005.1_G000620	Cytochrome P450 superfamily protein LENGTH=488	1.33719	2.6238	3.55842	0.0354044	6.92234e-05	2.12061e-07	1	0.00424063	1.79789e-05
PDACT_KE332831.1_G001080	Protein PLANT CADMIUM RESISTANCE 10	0.155288	1.27925	1.21146	0.628302	6.90823e-05	0.000166214	1	0.00424063	0.00306847
PDACT_KE332838.1_G000640	Protein phosphatase 2C family protein LENGTH=428	-0.328057	-1.32895	-2.24037	0.316949	6.96247e-05	9.1304e-11	1	0.00425015	3.55129e-08
PDACT_KE332601.1_G001700	AP2-like ethylene-responsive transcription factor	-1.77824	-4.33444	-5.43689	0.083348	6.97911e-05	2.78001e-07	1	0.00425015	2.20458e-05
PDACT_KE332559.1_G003340	Pyridoxamine 5'-phosphate oxidase family protein LENGTH=392	0.576481	-2.48525	-2.36685	0.323895	7.02461e-05	0.000165531	1	0.00425015	0.0030608
PDACT_KE332763.1_G000930	UDP-N-acetylglucosamine transporter	-0.0475567	-1.08087	-0.863074	0.859126	7.01422e-05	0.00145057	1	0.00425015	0.0152291
PDACT_KE332809.1_G000890	Tetratricopeptide repeat (TPR)-like superfamily protein LENGTH=1065	0.822773	-2.72547	-0.186731	0.201472	7.23937e-05	0.771205	1	0.0043693	0.886172
PDACT_KE332647.1_G001810	unknown protein; FUNCTIONS IN: molecular function unknown; LOCATED IN: chloroplast; EXPRESSED IN: 21 plant structures; EXPRESSED DURING: 13 growth stages;	-0.00991498	-1.32623	-1.59941	0.975961	7.44586e-05	2.12247e-06	1	0.00448288	0.000108635
PDACT_KE332652.1_G001660	1-deoxy-D-xylulose 5-phosphate synthase 1 LENGTH=641	0.394152	-1.68109	-1.51424	0.340438	7.48796e-05	0.000338988	1	0.00448618	0.00522097
PDACT_KE332724.1_G000860	germin-like protein 10 LENGTH=220	-0.47761	-1.86138	-1.58597	0.293553	7.47761e-05	0.000680625	1	0.00448618	0.00876869
PDACT_KE332630.1_G000610	14-3-3-like protein GF14 epsilon	0.27167	1.09002	0.692852	0.320138	7.50647e-05	0.0114608	1	0.00448631	0.0649798
PDACT_KE332692.1_G000260	DNA/RNA helicase protein LENGTH=862	0.344101	-1.79459	-1.31483	0.432487	7.68819e-05	0.003349	1	0.00458373	0.0280848
PDACT_KE332783.1_G000420	RING/U-box superfamily protein LENGTH=273	0.748667	1.59051	1.42255	0.0600197	7.72179e-05	0.000395177	1	0.00459259	0.00585582
PDACT_KE332921.1_G000600	Inositol hexakisphosphate and diphosphoinositol-pentakisphosphate kinase	0.188896	-1.66293	-1.93328	0.644909	7.83619e-05	5.39308e-06	1	0.00464935	0.00022099
PDACT_KE332971.1_G000530	Pentatricopeptide repeat (PPR) superfamily protein LENGTH=991	-0.241658	1.19001	1.7555	0.418928	7.93964e-05	9.56853e-09	1	0.00469935	1.56091e-06
PDACT_KE332563.1_G000920	tRNA pseudouridine(27/28) synthase	0.0638555	1.81796	1.9147	0.887771	7.96806e-05	3.4591e-05	1	0.0047048	0.000931448
PDACT_KE332737.1_G001440	Chaperone DnaJ-domain superfamily protein LENGTH=246	0.171988	1.05209	0.850512	0.515993	8.05922e-05	0.00139639	1	0.00474719	0.0148576
PDACT_KE332638.1_G001720	Protein kinase superfamily protein LENGTH=350	0.106263	1.72419	1.92642	0.806014	8.14274e-05	1.22972e-05	1	0.00478488	0.00042004
PDACT_KE332599.1_G003000	catalase 2 LENGTH=492	0.195417	1.51206	1.17446	0.603121	8.21062e-05	0.00203873	1	0.00481323	0.0196759
PDACT_KE332671.1_G001250	cysteine synthase D1 LENGTH=324	0.147575	1.34415	0.894574	0.660448	8.23559e-05	0.00819067	1	0.00481635	0.0521546
PDACT_KE332588.1_G001410	Leucine-rich receptor-like protein kinase family protein LENGTH=977	-0.107679	-1.528	-2.74206	0.776727	8.38604e-05	1.49952e-11	1	0.00488715	7.65503e-09
PDACT_KE333867.1_G000160	1-aminocyclopropane-1-carboxylate synthase 4 LENGTH=474	-0.118502	-1.04405	-1.33805	0.651646	8.39655e-05	5.68052e-07	1	0.00488715	3.94634e-05
PDACT_KE332552.1_G001240	protein n=3 Tax=Oryza RepID=Q942Q6 ORYSJ	-0.0913943	-2.71816	-3.73277	0.887893	8.45263e-05	2.9242e-07	1	0.00490814	2.28928e-05
PDACT_KE332577.1_G003370	Magnesium transporter MRS2-F	-0.172066	-1.08016	-1.54306	0.526415	8.52084e-05	2.9751e-08	1	0.00493605	3.74694e-06
PDACT_KE332633.1_G002430	unknown protein; BEST Arabidopsis thaliana protein match is: unknown protein . LENGTH=308	0.303109	1.3325	1.96444	0.364503	8.56403e-05	1.29221e-08	1	0.00494936	1.95459e-06
PDACT_KE332987.1_G000150	Chalcone--flavonone isomerase	0.375089	-1.42355	-2.02703	0.291197	8.61698e-05	4.42139e-08	1	0.00495175	5.0627e-06
PDACT_KE332551.1_G002660	Extended synaptotagmin-1	0.0417536	-1.00312	-1.20882	0.868752	8.64883e-05	2.54396e-06	1	0.00495175	0.00012568
PDACT_KE332627.1_G001730	N-acetyl-gamma-glutamyl-phosphate reductase	-0.0578488	1.03497	1.17779	0.824953	8.63122e-05	8.42399e-06	1	0.00495175	0.000317369
PDACT_KE332573.1_G000300	Hydrolase, alpha/beta fold family-like n=3 Tax=Oryza RepID=Q6YVH6 ORYSJ	0.0810542	-1.48552	-2.04559	0.826945	8.78334e-05	1.132e-07	1	0.00500528	1.08779e-05
PDACT_KE332729.1_G000980	LL-diaminopimelate aminotransferase	0.214092	1.45417	1.5627	0.559478	8.81148e-05	2.66338e-05	1	0.00500551	0.000767747
PDACT_KE332826.1_G000500	alpha/beta-Hydrolases superfamily protein LENGTH=340	0.546541	2.54866	3.41047	0.377416	9.04893e-05	4.35742e-07	1	0.0051209	3.19683e-05
PDACT_KE332792.1_G000760	myb domain protein 43 LENGTH=327	1.40521	3.1895	1.76356	0.0655202	9.24032e-05	0.0224318	1	0.00521716	0.103166
PDACT_KE332617.1_G002570	adenosine kinase 2 LENGTH=345	-0.452985	-1.42805	-2.09437	0.206616	9.29601e-05	2.16884e-08	1	0.00523228	2.98569e-06
PDACT_KE332546.1_G002760	Pentatricopeptide repeat-containing protein	-0.200524	2.36909	2.99113	0.732332	9.30981e-05	1.45519e-06	1	0.00523228	8.22186e-05
PDACT_KE332772.1_G001380	phosphofructokinase 5 LENGTH=537	0.470642	1.26484	1.37431	0.142297	9.41735e-05	2.32765e-05	1	0.00528061	0.000688848
PDACT_KE332658.1_G000220	Solute carrier family 2, facilitated glucose transporter member 1	0.0753939	-1.42	-2.17453	0.832705	9.59074e-05	5.57105e-09	1	0.00535054	1.05824e-06
PDACT_KE332609.1_G000700	Chromatin assembly factor 1 subunit A	-0.392932	-1.216	-1.50945	0.201252	9.60757e-05	1.59467e-06	1	0.00535054	8.86074e-05
PDACT_KE332582.1_G001840	10 kDa chaperonin	0.666145	1.60876	1.47364	0.10009	9.59178e-05	0.000337617	1	0.00535054	0.00520968
PDACT_KE332563.1_G003910	unknown protein; LOCATED IN: endomembrane system; EXPRESSED IN: 22 plant structures; EXPRESSED DURING: 13 growth stages; BEST Arabidopsis thaliana protein match is: unknown protein . LENGTH=115	0.00954897	1.68043	2.94088	0.981887	9.6559e-05	6.55412e-11	1	0.00535593	2.63282e-08
PDACT_KE332578.1_G000540	Plant calmodulin-binding protein-related LENGTH=507	0.225684	1.97411	2.08547	0.651104	9.66095e-05	4.15289e-05	1	0.00535593	0.00108143
PDACT_KE332546.1_G000170	alpha/beta-Hydrolases superfamily protein LENGTH=332	-0.0243535	-3.40354	0.0596922	0.976136	9.9525e-05	0.941461	1	0.0055051	0.974509
PDACT_KE332559.1_G006410	Leucine-rich repeat-containing protein 39	0.31544	-1.13639	-1.6976	0.274327	0.000100381	1.06119e-08	1	0.00553992	1.64578e-06
PDACT_KE332599.1_G003940	Protein of unknown function (DUF688) LENGTH=593	-0.204142	-1.0042	-0.914548	0.423827	0.000100894	0.000396713	1	0.00555573	0.00586666
PDACT_KE332575.1_G002940	UDP-Glycosyltransferase superfamily protein LENGTH=489	-0.0152826	-1.96384	-1.71604	0.974969	0.000102922	0.000637395	1	0.00565469	0.00840168
PDACT_KE332579.1_G001700	myb domain protein 12 LENGTH=371	1.01159	-2.40526	-2.86841	0.0845864	0.000103261	7.86567e-06	1	0.00566064	0.000300687
PDACT_KE332546.1_G004850	Pentatricopeptide repeat-containing protein	0.0399915	1.07359	1.5992	0.884325	0.000104378	1.12229e-08	1	0.00570911	1.71879e-06
PDACT_KE332558.1_G005340	DNA polymerase	-0.0987957	-1.20133	-1.36534	0.745514	0.000105081	1.2034e-05	1	0.00572199	0.000414741
PDACT_KE332699.1_G001710	Potassium-transporting ATPase B chain	-0.0746036	-1.55513	-1.56913	0.848161	0.000104851	9.78188e-05	1	0.00572199	0.00206456
PDACT_KE333025.1_G000330	Ethylene receptor	-0.0899649	-1.50967	-1.7239	0.813107	0.000105866	1.11059e-05	1	0.00573925	0.000393263
PDACT_KE332643.1_G000970	Cytosol aminopeptidase family protein LENGTH=520	0.494039	1.16709	0.927288	0.0975282	0.000105847	0.00198167	1	0.00573925	0.0192694
PDACT_KE332686.1_G000990	Insulinase (Peptidase family M16) protein LENGTH=956	-0.0989403	-0.953947	-0.945204	0.684836	0.000107082	0.000125192	1	0.00579236	0.00249253
PDACT_KE332628.1_G001970	Nucleoredoxin	0.623655	1.42571	1.55262	0.0861387	0.000107541	2.64361e-05	1	0.00580439	0.00076668
PDACT_KE333977.1_G000120	calcium-transporting ATPase, putative LENGTH=1049	-0.0175836	-1.56894	-2.17087	0.964558	0.000109056	1.56654e-07	1	0.00586031	1.42172e-05
PDACT_KE333070.1_G000720	Terpenoid cyclases/Protein prenyltransferases superfamily protein LENGTH=785	-1.92927	-5.09118	-5.61612	0.0975833	0.000108883	3.05655e-05	1	0.00586031	0.000852078
PDACT_KE332785.1_G000940	Thiamine thiazole synthase	0.504717	1.48569	1.04292	0.181079	0.000110992	0.0061144	1	0.00595129	0.0424552
PDACT_KE332546.1_G005440	Protein of unknown function, DUF617 LENGTH=264	0.610965	-2.64767	-1.68854	0.343726	0.000111428	0.0110273	1	0.00596163	0.0635047
PDACT_KE332656.1_G002190	Protein kinase superfamily protein LENGTH=1235	-0.063246	-3.01975	-1.09503	0.930678	0.000111692	0.137454	1	0.00596275	0.334177
PDACT_KE332682.1_G002130	Kelch-like protein 25	-0.428596	2.15165	1.24875	0.42928	0.000112435	0.0220343	1	0.00598938	0.102075
PDACT_KE332929.1_G001100	ferredoxin 3 LENGTH=155	1.10567	3.18903	1.97828	0.150284	0.00011378	0.0120127	1	0.00604788	0.0671745
PDACT_KE332580.1_G000230	FAR1-related sequence 5 LENGTH=788	0.0850128	-1.09235	-0.672622	0.76103	0.000117968	0.0169503	1	0.00624339	0.0853048
PDACT_KE332555.1_G000780	Flap endonuclease 1	-0.567273	-1.68063	-1.09554	0.183122	0.00011841	0.0108477	1	0.00625328	0.0628759
PDACT_KE332564.1_G000870	Thioredoxin reductase 2	-1.10434	-3.4984	-2.32835	0.204256	0.000118827	0.00926683	1	0.00626177	0.0565706
PDACT_KE332547.1_G000710	unknown protein; BEST Arabidopsis thaliana protein match is: unknown protein . LENGTH=140	0.132453	-1.42358	-2.19734	0.714852	0.000119214	7.21386e-09	1	0.00626874	1.28093e-06
PDACT_KE333770.1_G000110	flavanone 3-hydroxylase LENGTH=358	1.33839	2.58471	1.67315	0.0382648	0.000120461	0.0102473	1	0.0063207	0.0606524
PDACT_KE332571.1_G002760	Haloacid dehalogenase-like hydrolase (HAD) superfamily protein LENGTH=280	-0.453845	1.80701	5.37114	0.32982	0.000122034	6.97831e-23	1	0.00636237	8.54982e-19
PDACT_KE332783.1_G000350	ROTUNDIFOLIA like 7 LENGTH=79	0.828737	-2.56056	-0.508206	0.188577	0.000121878	0.42004	1	0.00636237	0.646583
PDACT_KE333062.1_G000370	RNA polymerase sigma-B factor	0.407567	-1.56268	-1.49291	0.305949	0.000122632	0.000236991	1	0.00638	0.0040384
PDACT_KE332594.1_G000930	zinc finger (Ran-binding) family protein LENGTH=268	0.346685	1.05648	1.63697	0.206275	0.000123223	4.18203e-09	1	0.00638362	8.39971e-07
PDACT_KE333298.1_G000190	auxin response factor 2 LENGTH=859	-0.983221	-3.50139	-4.30969	0.246884	0.000122984	6.24536e-06	1	0.00638362	0.000246833
PDACT_KE332856.1_G001040	alpha/beta-Hydrolases superfamily protein LENGTH=312	0.523693	-1.47164	-2.19209	0.162324	0.000123751	2.83673e-08	1	0.00639743	3.65848e-06
PDACT_KE332554.1_G001650	glutamine synthetase 1;4 LENGTH=356	0.815541	1.68965	1.97305	0.060189	0.000126073	9.01447e-06	1	0.00650378	0.000333503
PDACT_KE332549.1_G003350	CCT motif family protein LENGTH=339	-0.539529	1.57471	2.29191	0.183482	0.000126846	4.9251e-08	1	0.00652988	5.4405e-06
PDACT_KE332582.1_G002650	Calcium-binding EF-hand family protein LENGTH=335	-0.266016	-0.992304	-1.0702	0.299568	0.000127747	3.7751e-05	1	0.00656252	0.00100331
PDACT_KE332565.1_G002150	Phospholipase A1-II 3	1.0223	2.78144	3.56212	0.136147	0.00012813	2.19192e-06	1	0.00656839	0.000111202
PDACT_KE332558.1_G004370	Receptor-type tyrosine-protein phosphatase S	0.0230775	-1.19633	-1.32089	0.940173	0.000130653	2.67828e-05	1	0.00668375	0.000769386
PDACT_KE332610.1_G000390	Aspartokinase	0.0685257	1.22713	1.51937	0.828876	0.000131937	2.61038e-06	1	0.00673537	0.000127703
PDACT_KE334153.1_G000110	Pentatricopeptide repeat (PPR) superfamily protein LENGTH=458	-0.162084	1.46484	1.69928	0.671309	0.000132745	1.05544e-05	1	0.00676254	0.000377471
PDACT_KE332649.1_G001880	Protein kinase superfamily protein LENGTH=889	0.199836	-2.32149	-2.22625	0.727741	0.00013316	0.000255123	1	0.00676963	0.00427816
PDACT_KE333377.1_G000510	Elongation factor 4	-0.327434	-1.18954	-1.68376	0.286545	0.000135589	1.05311e-07	1	0.00686488	1.0281e-05
PDACT_KE333547.1_G000270	glyceraldehyde-3-phosphate dehydrogenase C2 LENGTH=338	-0.199735	1.39126	0.997695	0.581948	0.000135594	0.00595483	1	0.00686488	0.041801
PDACT_KE332859.1_G000810	MORC family CW-type zinc finger protein 3	0.119375	1.21894	1.39146	0.70792	0.000135979	1.44436e-05	1	0.00687015	0.000473645
PDACT_KE333102.1_G000580	Protein kinase superfamily protein LENGTH=720	0.604742	-4.2134	-3.26162	0.535723	0.000136882	0.00206862	1	0.00690154	0.0198686
PDACT_KE332704.1_G001010	AP2-like ethylene-responsive transcription factor	-0.0897867	-1.16456	-0.97199	0.765191	0.000137377	0.001406	1	0.00691228	0.0149275
PDACT_KE332549.1_G006510	Glutamine amidotransferase type 1 family protein LENGTH=222	0.223632	1.43983	1.95027	0.549288	0.000137851	3.53754e-07	1	0.00691261	2.70043e-05
PDACT_KE333147.1_G000680	unknown protein; LOCATED IN: chloroplast, vacuole; EXPRESSED IN: 22 plant structures; EXPRESSED DURING: 13 growth stages;	0.018737	1.27057	0.849373	0.954711	0.000137948	0.0103596	1	0.00691261	0.061154
PDACT_KE333045.1_G000710	ADP,ATP carrier protein 3, mitochondrial	0.0397591	1.08208	0.682044	0.887449	0.000138751	0.0156288	1	0.00693867	0.0807947
PDACT_KE332546.1_G000690	CTC-interacting domain 7 LENGTH=567	0.066308	-1.24064	-1.37385	0.836221	0.000139388	2.63287e-05	1	0.00695632	0.000765314
PDACT_KE332925.1_G000250	FUNCTIONS IN: molecular function unknown; INVOLVED IN: biological process unknown; LOCATED IN: chloroplast, vacuole; EXPRESSED IN: 19 plant structures; EXPRESSED DURING: 11 growth stages;	0.16293	-2.16981	-1.47505	0.764142	0.000142921	0.00830926	1	0.00711818	0.0525989
PDACT_KE332550.1_G001590	myb domain protein r1 LENGTH=305	0.0881093	1.84463	2.39573	0.851672	0.000144211	1.28508e-06	1	0.00716786	7.47973e-05
PDACT_KE333181.1_G000390	E3 ubiquitin-protein ligase BAH1	0.900272	2.55664	3.04373	0.161536	0.000146774	9.36793e-06	1	0.00727263	0.000342172
PDACT_KE332607.1_G000320	5'-AMP-activated protein kinase beta-2 subunit protein LENGTH=261	-0.62479	-1.99639	-2.01719	0.21955	0.000148857	0.000128861	1	0.00733923	0.00253827
PDACT_KE333025.1_G000630	U2 small nuclear ribonucleoprotein B LENGTH=232	0.343107	1.21718	0.642701	0.280756	0.000150924	0.0437458	1	0.00742619	0.160207
PDACT_KE332578.1_G003730	GTP binding Elongation factor Tu family protein LENGTH=454	-0.306994	-1.34838	-1.9054	0.380507	0.000151935	1.40057e-07	1	0.00744702	1.30858e-05
PDACT_KE333548.1_G000380	unknown protein; BEST Arabidopsis thaliana protein match is: unknown protein . LENGTH=334	-0.132537	-1.37392	-1.32064	0.7093	0.000151955	0.000273917	1	0.00744702	0.00449869
PDACT_KE332548.1_G002480	prephenate dehydratase 1 LENGTH=424	0.121387	-0.979538	-0.813386	0.635244	0.000155016	0.00164987	1	0.00756677	0.0167544
PDACT_KE332646.1_G000250	unknown protein; FUNCTIONS IN: molecular function unknown; INVOLVED IN: N-terminal protein myristoylation; LOCATED IN: plasma membrane; EXPRESSED IN: 22 plant structures; EXPRESSED DURING: 13 growth stages; BEST Arabidopsis thaliana protein match is: unknown protein . LENGTH=234	0.272101	-1.32045	-0.738665	0.427261	0.000155755	0.0322531	1	0.00758769	0.131208
PDACT_KE332614.1_G001730	DEAD-box ATP-dependent RNA helicase 40	-0.778833	-1.47893	-2.0085	0.0431485	0.000158827	5.15794e-07	1	0.00772204	3.67413e-05
PDACT_KE332627.1_G000220	RNA-binding (RRM/RBD/RNP motifs) family protein LENGTH=405	0.168677	1.03348	0.865535	0.53427	0.000159238	0.00152189	1	0.00772667	0.0158085
PDACT_KE332549.1_G003340	Zinc finger protein CONSTANS-LIKE 7	-0.218192	1.84183	2.61727	0.646902	0.000159717	1.76745e-07	1	0.00773459	1.55231e-05
PDACT_KE332658.1_G000170	Solute carrier family 2, facilitated glucose transporter member 12	-0.701008	-1.39423	-1.49425	0.0543401	0.000160984	5.53233e-05	1	0.00777398	0.00133957
PDACT_KE332662.1_G001410	Inositol monophosphatase family protein LENGTH=271	0.378113	1.04352	0.710354	0.169067	0.000161165	0.00996351	1	0.00777398	0.0595042
PDACT_KE332684.1_G000920	RNI-like superfamily protein LENGTH=693	-0.291727	-2.44241	-1.97047	0.633751	0.000162312	0.00201422	1	0.00781395	0.0195317
PDACT_KE332556.1_G000930	cullin 3B LENGTH=732	0.446495	1.8714	2.16002	0.364897	0.000162794	1.64458e-05	1	0.00782177	0.000528856
PDACT_KE332621.1_G000730	RNA-binding protein 28	0.221279	0.957384	1.09391	0.380981	0.000164475	1.7614e-05	1	0.00788673	0.000558361
PDACT_KE332684.1_G001130	unknown protein; Has 30201 Blast hits to 17322 proteins in 780 species: Archae - 12; Bacteria - 1396; Metazoa - 17338; Fungi - 3422; Plants - 5037; Viruses - 0; Other Eukaryotes - 2996 (source: NCBI BLink). LENGTH=276	-0.458719	-1.77419	-1.82578	0.313488	0.000165111	0.000117235	1	0.00788673	0.00237219
PDACT_KE332665.1_G001850	GDSL esterase/lipase	-0.662015	-4.18787	-1.9146	0.608593	0.000164963	0.140174	1	0.00788673	0.338339
PDACT_KE332569.1_G005050	unknown protein;	0.0588237	-3.6738	-1.32165	0.947561	0.000165435	0.145531	1	0.00788682	0.346761
PDACT_KE333788.1_G000200	Nucleotide-diphospho-sugar transferase family protein LENGTH=386	-1.82227	-3.89969	-6.30917	0.0556724	0.00016722	4.92895e-08	1	0.00794101	5.4405e-06
PDACT_KE332852.1_G001040	Pentatricopeptide repeat-containing protein	0.754652	1.56113	1.64233	0.0663545	0.00016693	7.86638e-05	1	0.00794101	0.00174441
PDACT_KE332565.1_G001720	auxin response factor 9 LENGTH=638	-0.0493017	-1.25367	-1.47763	0.880589	0.000172296	1.0973e-05	1	0.00814066	0.000389121
PDACT_KE332972.1_G000180	Ent-kaurene synthase-like 2	0.239759	2.74471	2.38562	0.727476	0.000175982	0.000947894	1	0.00827688	0.0111636
PDACT_KE333414.1_G000400	myb domain protein 50 LENGTH=314	0.313843	2.73343	2.32724	0.646435	0.000176919	0.00118051	1	0.00830504	0.0131249
PDACT_KE332573.1_G001530	poor homologous synapsis 1 LENGTH=410	-0.54678	-1.60547	-2.12164	0.190347	0.000178467	1.33691e-06	1	0.00835959	7.72632e-05
PDACT_KE332545.1_G008960	Katanin p80 WD40 repeat-containing subunit B1 homolog	0.338579	1.38204	1.24157	0.352951	0.000178991	0.000743773	1	0.00835959	0.00931485
PDACT_KE332548.1_G001260	Protein kinase superfamily protein LENGTH=525	0.116338	1.54789	1.0118	0.775894	0.000179105	0.0135937	1	0.00835959	0.0733057
PDACT_KE332601.1_G002670	glutamine dumper 3 LENGTH=148	0.545003	2.85207	1.265	0.443974	0.000179717	0.0797898	1	0.00837222	0.237335
PDACT_KE333089.1_G000410	cellulose synthase like E1 LENGTH=729	0.0578713	1.21125	1.75256	0.856867	0.000180989	8.9401e-08	1	0.00841546	8.97821e-06
PDACT_KE332620.1_G001940	PHD finger protein ALFIN-LIKE 5	0.248697	1.17047	1.82073	0.423497	0.000182427	9.83676e-09	1	0.00846629	1.5652e-06
PDACT_KE332548.1_G005840	glucan endo-1,3-beta-glucosidase-like protein 3 LENGTH=194	0.228574	1.7126	2.20052	0.611775	0.000184001	2.21196e-06	1	0.00852319	0.000111987
PDACT_KE332608.1_G000390	Short-chain dehydrogenase/reductase 2b	-0.0860458	2.40992	2.84952	0.890736	0.00018456	1.40241e-05	1	0.00853294	0.000463762
PDACT_KE333296.1_G000220	PATATIN-like protein 4 LENGTH=428	-1.09989	-3.14843	-3.64152	0.166176	0.000185293	2.83149e-05	1	0.00855071	0.000805653
PDACT_KE333134.1_G000290	ELMO domain-containing protein A	0.195243	-1.11842	-1.08671	0.507864	0.000186543	0.000286614	1	0.00859222	0.00464496
PDACT_KE332711.1_G001490	Zinc finger protein CONSTANS-LIKE 7	0.062294	-1.54687	-1.7722	0.87776	0.000188952	2.15097e-05	1	0.00868683	0.000649905
PDACT_KE332563.1_G003480	WD repeat domain phosphoinositide-interacting protein 3	0.317065	1.2866	2.13992	0.354435	0.00019115	1.3053e-09	1	0.0087512	3.0462e-07
PDACT_KE332624.1_G002220	Endoglucanase	-0.231279	-3.51268	-3.34622	0.806856	0.000191449	0.000516322	1	0.0087512	0.00716014
PDACT_KE332548.1_G007080	Tetratricopeptide repeat (TPR)-like superfamily protein LENGTH=333	0.0744811	1.10175	0.807745	0.799108	0.000191283	0.00601431	1	0.0087512	0.0420349
PDACT_KE332592.1_G000930	Kinesin heavy chain isolog n=1 Tax=Zea mays RepID=B6TA17 MAIZE	0.128716	1.14713	0.619046	0.672744	0.000191781	0.0426442	1	0.0087512	0.15732
PDACT_KE333097.1_G000400	NAC domain containing protein 28 LENGTH=631	0.242632	1.29828	2.08132	0.480843	0.000195463	5.22904e-09	1	0.00875886	1.00103e-06
PDACT_KE332548.1_G007970	Inorganic pyrophosphatase	-0.700236	-1.34614	-2.13109	0.0493978	0.000194805	9.57602e-09	1	0.00875886	1.56091e-06
PDACT_KE332720.1_G001200	glucan endo-1,3-beta-glucosidase-like protein 3 LENGTH=194	0.413001	1.43069	1.94934	0.275818	0.000195461	5.68663e-07	1	0.00875886	3.94634e-05
PDACT_KE332592.1_G000320	Transcription factor bHLH121	0.215125	1.0445	1.35035	0.441064	0.000195693	1.71388e-06	1	0.00875886	9.37429e-05
PDACT_KE332664.1_G001270	DNA mismatch repair protein MutS	0.290634	-1.75304	-2.10478	0.522072	0.000196018	1.17605e-05	1	0.00875886	0.000407595
PDACT_KE332642.1_G001310	ARID/BRIGHT DNA-binding domain;ELM2 domain protein LENGTH=573	-0.0834151	1.81511	2.04111	0.863311	0.000194548	3.20899e-05	1	0.00875886	0.000885507
PDACT_KE333420.1_G000160	unknown protein; Has 32 Blast hits to 32 proteins in 16 species: Archae - 0; Bacteria - 0; Metazoa - 2; Fungi - 0; Plants - 28; Viruses - 0; Other Eukaryotes - 2 (source: NCBI BLink). LENGTH=127	-0.112784	1.6562	1.84347	0.79887	0.000193171	3.70887e-05	1	0.00875886	0.000990003
PDACT_KE336252.1_G000120	laccase 11 LENGTH=557	-0.744887	-3.98876	-3.61662	0.554713	0.000194162	0.00249602	1	0.00875886	0.0228133
PDACT_KE332841.1_G001050	glutamate dehydrogenase 1 LENGTH=411	-0.0907638	-3.62688	-1.64829	0.920963	0.000196238	0.077483	1	0.00875886	0.232759
PDACT_KE333023.1_G000370	Cathepsin B-like cysteine proteinase 1	-0.642343	1.91536	-0.0406755	0.199141	0.000195985	0.934927	1	0.00875886	0.971604
PDACT_KE332557.1_G003310	galactinol synthase 1 LENGTH=344	0.0194912	-1.56814	-0.221262	0.962167	0.000197584	0.590684	1	0.00880292	0.773575
PDACT_KE332710.1_G001090	SBP (S-ribonuclease binding protein) family protein LENGTH=312	0.282671	-2.62679	-2.59467	0.670943	0.000198675	0.000239728	1	0.00883545	0.00407371
PDACT_KE332724.1_G000650	Hepatocellular carcinoma-associated antigen 59 family protein, expressed n=4 Tax=Oryza RepID=Q7Y163 ORYSJ	0.166457	-0.92138	-0.967311	0.496471	0.00019932	9.92558e-05	1	0.00884805	0.00209282
PDACT_KE333062.1_G000410	Ubiquitin carboxyl-terminal hydrolase family protein LENGTH=528	-0.337763	1.02023	1.07744	0.215204	0.000199916	8.77091e-05	1	0.0088585	0.00189861
PDACT_KE332572.1_G001830	glycoside hydrolase family 28 protein / polygalacturonase (pectinase) family protein LENGTH=664	0.642666	-3.78428	-0.218828	0.55177	0.000200978	0.8375	1	0.00888947	0.922765
PDACT_KE333400.1_G000140	Protein kinase superfamily protein LENGTH=456	0.355859	1.33357	1.56757	0.318039	0.000205135	1.44583e-05	1	0.0090407	0.000473645
PDACT_KE332638.1_G000170	RING/U-box superfamily protein LENGTH=691	0.166745	-1.28567	-0.957389	0.624734	0.000206025	0.00538759	1	0.00904736	0.0388973
PDACT_KE333364.1_G000620	NAC domain containing protein 35 LENGTH=414	-0.265698	-1.52378	-0.628793	0.505914	0.000205973	0.117317	1	0.00904736	0.302708
PDACT_KE332566.1_G002710	Ion channel DMI1	0.364922	1.65125	1.13551	0.402886	0.000210035	0.0099444	1	0.00920697	0.0594485
PDACT_KE332632.1_G001980	Protein kinase superfamily protein LENGTH=718	-0.0608108	-1.80193	-2.28729	0.897389	0.000211834	3.82952e-06	1	0.00925273	0.000168774
PDACT_KE333456.1_G000260	unknown protein; FUNCTIONS IN: molecular function unknown; INVOLVED IN: biological process unknown; LOCATED IN: chloroplast, chloroplast stroma; EXPRESSED IN: 22 plant structures; EXPRESSED DURING: 13 growth stages; Has 26 Blast hits to 26 proteins in 9 species: Archae - 0; Bacteria - 0; Metazoa - 0; Fungi - 0; Plants - 26; Viruses - 0; Other Eukaryotes - 0 (source: NCBI BLink). LENGTH=211	-0.030624	1.43078	1.14084	0.935603	0.00021275	0.0029471	1	0.00927618	0.0256539
PDACT_KE332651.1_G000240	unknown protein; BEST Arabidopsis thaliana protein match is: unknown protein . LENGTH=261	0.671577	2.92008	3.945	0.355642	0.000213714	1.98262e-06	1	0.0093017	0.000103808
PDACT_KE332557.1_G003980	Pyruvate kinase family protein LENGTH=498	-0.169943	-2.3279	-3.88631	0.776216	0.000215117	9.52646e-09	1	0.00932959	1.56091e-06
PDACT_KE333263.1_G000180	Unknown protein	-0.0435719	-2.95278	-3.20206	0.953948	0.000214874	8.98322e-05	1	0.00932959	0.00192585
PDACT_KE332972.1_G000800	Protein of unknown function (DUF679) LENGTH=214	0.0996375	2.09617	2.78429	0.856135	0.000217288	1.68563e-06	1	0.00940712	9.26115e-05
PDACT_KE332848.1_G000630	EH domain-containing protein 1	-0.00103698	-1.36876	-1.66595	0.997711	0.000218427	8.92912e-06	1	0.00943974	0.000332521
PDACT_KE332603.1_G001700	Ethylene-responsive transcription factor 1	-0.853472	-2.57426	-5.25183	0.19695	0.000218915	3.19031e-11	1	0.00944416	1.44769e-08
PDACT_KE332552.1_G006740	ADP,ATP carrier protein 1	-0.65248	-1.35233	-1.0371	0.0708121	0.00022051	0.00432776	1	0.00949626	0.0334745
PDACT_KE332549.1_G005060	Glucose-induced degradation protein 8 homolog	-0.1206	1.74116	1.71733	0.796416	0.000221407	0.0002753	1	0.00951817	0.00450933
PDACT_KE332558.1_G001070	Protein FAM188A	0.269459	1.15829	1.47239	0.387492	0.000222374	3.17398e-06	1	0.00954301	0.000147862
PDACT_KE332734.1_G001050	Calcium-dependent lipid-binding (CaLB domain) family protein LENGTH=360	-0.384516	-2.44671	-2.52604	0.53986	0.000223074	0.000162359	1	0.00955628	0.00302077
PDACT_KE332552.1_G003810	60 kDa chaperonin 1	0.574351	1.64927	1.36479	0.189511	0.000223828	0.00209776	1	0.00957187	0.0200933
PDACT_KE332557.1_G005530	Transmembrane protein 184C	-0.115301	-1.00687	-1.06381	0.669346	0.000227659	0.000102111	1	0.00971874	0.00213128
PDACT_KE332594.1_G002510	Protein TRIGALACTOSYLDIACYLGLYCEROL 4, chloroplastic	-0.111687	1.02908	0.781083	0.687318	0.000230407	0.00503046	1	0.00981895	0.0371061
PDACT_KE332996.1_G001010	Protein of unknown function (DUF506) LENGTH=287	0.288454	1.84491	3.34943	0.553657	0.000232054	2.89551e-10	1	0.00987198	9.29548e-08
PDACT_KE332665.1_G001400	RING/U-box superfamily protein LENGTH=426	0.0703558	1.34061	1.09505	0.846187	0.00023251	0.00258932	1	0.00987423	0.0234128
PDACT_KE332617.1_G001510	RING/U-box superfamily protein LENGTH=491	0.230741	-1.25069	-1.04966	0.489156	0.000233508	0.00194914	1	0.00989943	0.019021
PDACT_KE332903.1_G000560	unknown protein; Has 36 Blast hits to 36 proteins in 15 species: Archae - 0; Bacteria - 0; Metazoa - 3; Fungi - 0; Plants - 33; Viruses - 0; Other Eukaryotes - 0 (source: NCBI BLink). LENGTH=265	0.196349	-3.11265	-2.4907	0.803872	0.000234268	0.00283133	1	0.00991452	0.0249116
PDACT_KE332992.1_G000300	Protein kinase superfamily protein LENGTH=412	0.18251	-0.97085	-1.06592	0.484188	0.000235433	5.71324e-05	1	0.00994663	0.00136984
PDACT_KE333167.1_G000710	Molybdenum cofactor sulfurase 1	0.2754	-1.34343	-2.05459	0.440911	0.000239005	5.11684e-08	1	0.0100802	5.62256e-06
PDACT_KE332548.1_G003810	Phosphatidylinositide phosphatase SAC1	0.0408561	-1.08633	-1.96122	0.888516	0.000240354	1.31912e-10	1	0.0101196	4.82443e-08
PDACT_KE332810.1_G000400	CMP-sialic acid transporter 3	0.0825468	-1.41258	-2.19047	0.825669	0.000241294	4.07883e-08	1	0.0101418	4.78218e-06
PDACT_KE332689.1_G000660	Oxysterol-binding protein-related protein 4C	0.0863932	-1.58847	-1.49673	0.837822	0.000243576	0.000532391	1	0.0102202	0.00734142
PDACT_KE334269.1_G000330	14-3-3-like protein GF14 epsilon	-0.459478	-2.00232	-1.85098	0.383117	0.000247297	0.000662614	1	0.0103586	0.00861364
PDACT_KE332698.1_G002180	RING/U-box superfamily protein LENGTH=863	-0.0903265	-0.989377	-1.16432	0.735383	0.000249532	1.795e-05	1	0.0103996	0.000565355
PDACT_KE332661.1_G000400	Glycerol kinase	-0.730271	-3.33204	-3.96741	0.384639	0.000250331	2.30114e-05	1	0.0103996	0.000684949
PDACT_KE332678.1_G000650	Unknown protein	1.26732	3.20954	3.53237	0.120954	0.0002504	7.13129e-05	1	0.0103996	0.00163009
PDACT_KE332652.1_G001230	Unknown protein	-0.333344	-1.44481	-0.811291	0.388183	0.000249302	0.0370799	1	0.0103996	0.143336
PDACT_KE332853.1_G000810	Ketohexokinase n=1 Tax=Triticum urartu RepID=M7Z366 TRIUA	-0.783187	-3.26411	-0.890084	0.357716	0.000249818	0.298362	1	0.0103996	0.532679
PDACT_KE333184.1_G000410	unknown protein; FUNCTIONS IN: molecular function unknown; INVOLVED IN: biological process unknown; LOCATED IN: anchored to plasma membrane, plasma membrane, anchored to membrane; EXPRESSED IN: 23 plant structures; EXPRESSED DURING: 13 growth stages; BEST Arabidopsis thaliana protein match is: unknown protein . LENGTH=433	-0.252329	-1.38138	-1.35531	0.495542	0.000251961	0.000329466	1	0.0104148	0.00510964
PDACT_KE332600.1_G001720	Ankyrin repeat domain-containing protein 13C-A	-0.684711	-2.74604	-1.92232	0.333189	0.000251523	0.00848679	1	0.0104148	0.0532276
PDACT_KE332590.1_G002890	26S protease regulatory subunit 6B homolog	-0.233079	-1.16738	-1.36387	0.45954	0.000256759	2.16884e-05	1	0.010592	0.000653694
PDACT_KE333056.1_G000380	nuclear transport factor 2B LENGTH=134	0.365077	1.61093	1.07734	0.399708	0.000257677	0.0135107	1	0.010612	0.0729711
PDACT_KE332916.1_G000610	BRI1-KD interacting protein n=2 Tax=Phaseolus vulgaris RepID=T2DLB0 PHAVU	0.227064	0.941881	1.42215	0.375383	0.000258231	4.72542e-08	1	0.0106169	5.31155e-06
PDACT_KE332721.1_G001290	Protein kinase superfamily protein LENGTH=418	-0.300425	-1.00942	-0.97705	0.272393	0.000260153	0.000407255	1	0.010678	0.00597926
PDACT_KE332550.1_G004020	Dehydrogenase/reductase SDR family protein 7-like	-0.334815	-2.46888	-4.07788	0.601313	0.000261441	2.54743e-08	1	0.0106951	3.35604e-06
PDACT_KE332591.1_G000430	Adrenodoxin-like protein, mitochondrial	-0.243275	-1.24435	-1.34113	0.468425	0.000261015	8.7429e-05	1	0.0106951	0.00189589
PDACT_KE332550.1_G000300	DNA-binding bromodomain-containing protein LENGTH=646	0.33509	-1.02803	-0.452012	0.228052	0.000262638	0.105421	1	0.0107083	0.282328
PDACT_KE332931.1_G000630	Sphingosine-1-phosphate lyase	-0.379879	-1.19144	-1.44192	0.238172	0.000263703	1.19913e-05	1	0.0107339	0.000413853
PDACT_KE332569.1_G004890	ralf-like 34 LENGTH=129	0.986964	2.72569	2.34593	0.163046	0.000264931	0.00144495	1	0.010766	0.0151897
PDACT_KE332560.1_G002220	RING/U-box superfamily protein LENGTH=159	0.348636	1.71742	2.01156	0.451566	0.000265411	2.28296e-05	1	0.0107676	0.000682215
PDACT_KE332662.1_G001400	Bifunctional phosphatase IMPL2, chloroplastic	0.178072	1.15423	0.626274	0.571979	0.000266422	0.0470205	1	0.0107908	0.168252
PDACT_KE332911.1_G000440	Double-strand-break repair protein rad21-like protein 1	0.185087	-1.15417	-1.24558	0.552847	0.000268063	8.83548e-05	1	0.0108314	0.00190921
PDACT_KE332559.1_G005160	unknown protein; BEST Arabidopsis thaliana protein match is: unknown protein . LENGTH=407	-0.0581868	1.92867	2.0541	0.91165	0.00026831	0.000113466	1	0.0108314	0.00231699
PDACT_KE332598.1_G002390	receptor kinase 2 LENGTH=847	-1.66236	-4.04809	-4.28039	0.132793	0.000269439	0.000123986	1	0.0108413	0.00247205
PDACT_KE332563.1_G004360	NAC domain containing protein 32 LENGTH=253	0.757767	-1.85486	-1.22464	0.125564	0.000269254	0.0143611	1	0.0108413	0.0761533
PDACT_KE332565.1_G004410	Peroxyureidoacrylate/ureidoacrylate amidohydrolase RutB	-0.324737	1.13326	1.42161	0.294381	0.00027341	5.74186e-06	1	0.0109764	0.000231793
PDACT_KE332551.1_G006940	glutaredoxin 4 LENGTH=169	0.00430186	1.08889	1.07448	0.988409	0.000274141	0.000329465	1	0.0109764	0.00510964
PDACT_KE334331.1_G000190	NAC domain containing protein 28 LENGTH=631	0.00224036	-3.35931	-2.4439	0.998392	0.000273831	0.0241689	1	0.0109764	0.108277
PDACT_KE332885.1_G000700	exportin 1A LENGTH=1075	-0.178095	0.957225	0.904078	0.496631	0.000277399	0.000592403	1	0.0110887	0.00796283
PDACT_KE332552.1_G006700	scarecrow-like 5 LENGTH=597	0.0560695	-2.89904	-2.99264	0.940091	0.000281518	0.000202678	1	0.0112026	0.00356526
PDACT_KE332657.1_G002320	unknown protein; FUNCTIONS IN: molecular function unknown; INVOLVED IN: biological process unknown; LOCATED IN: cellular component unknown; EXPRESSED IN: 23 plant structures; EXPRESSED DURING: 13 growth stages. LENGTH=188	0.155241	-1.85686	-1.91643	0.753197	0.000283502	0.000190434	1	0.0112592	0.00340862
PDACT_KE332740.1_G000580	14-3-3-like protein GF14-6	0.259117	1.6561	1.88816	0.563379	0.000284744	3.9837e-05	1	0.0112902	0.00104963
PDACT_KE332547.1_G005170	Coenzyme Q-binding protein COQ10 homolog, mitochondrial	0.502104	-1.35254	-1.46144	0.169984	0.000286746	9.62116e-05	1	0.0113512	0.00203766
PDACT_KE332573.1_G001980	Pentatricopeptide repeat-containing protein	0.148322	-2.50974	-0.816725	0.820185	0.000288039	0.216513	1	0.0113841	0.441458
PDACT_KE332635.1_G000110	Nascent polypeptide-associated complex subunit beta	-0.0866294	-0.974216	-1.00325	0.744691	0.00028858	0.000191812	1	0.0113871	0.00342578
PDACT_KE333050.1_G000130	Chitinase-3-like protein 1	-0.0370664	2.10291	1.95667	0.947549	0.000289048	0.000709474	1	0.0113872	0.00900334
PDACT_KE332561.1_G001480	PLATZ transcription factor family protein LENGTH=213	-0.477211	-2.73982	-6.38166	0.502276	0.000291561	7.82229e-13	1	0.0114677	5.63757e-10
PDACT_KE332623.1_G001800	unknown protein; Has 39 Blast hits to 39 proteins in 15 species: Archae - 0; Bacteria - 0; Metazoa - 0; Fungi - 0; Plants - 39; Viruses - 0; Other Eukaryotes - 0 (source: NCBI BLink). LENGTH=173	0.144824	-1.97485	-2.53288	0.78316	0.000294201	5.41338e-06	1	0.0114795	0.000221451
PDACT_KE332825.1_G001030	unknown protein; FUNCTIONS IN: molecular function unknown; INVOLVED IN: biological process unknown; LOCATED IN: mitochondrion; EXPRESSED IN: 7 plant structures; EXPRESSED DURING: 4 anthesis, C globular stage, petal differentiation and expansion stage; Has 106 Blast hits to 103 proteins in 21 species: Archae - 0; Bacteria - 5; Metazoa - 0; Fungi - 4; Plants - 87; Viruses - 0; Other Eukaryotes - 10…	2.57511	5.71461	6.8259	0.0445281	0.000292755	4.70624e-05	1	0.0114795	0.00118888
PDACT_KE332610.1_G000100	Histone-lysine N-methyltransferase, H3 lysine-9 specific SUVH4	-0.647007	-2.01979	-2.21659	0.229357	0.000293398	9.01626e-05	1	0.0114795	0.0019277
PDACT_KE332766.1_G000480	Coproporphyrinogen-III oxidase, aerobic	-0.075552	1.11887	1.12723	0.804661	0.000294101	0.000265705	1	0.0114795	0.00439327
PDACT_KE332926.1_G001110	2-nitropropane dioxygenase n=2 Tax=Alcaligenes RepID=M5J377 9BURK	0.369469	-1.65387	-1.3108	0.405793	0.000293569	0.00378108	1	0.0114795	0.0304958
PDACT_KE332604.1_G002050	Peroxidase superfamily protein LENGTH=346	0.65343	1.80289	1.50222	0.184239	0.000294982	0.00246038	1	0.0114916	0.0226139
PDACT_KE332636.1_G002460	22.3 kDa class VI heat shock protein	0.119928	1.27758	1.17581	0.731969	0.00029634	0.000856238	1	0.0115262	0.0103051
PDACT_KE332597.1_G001620	Elongation factor 1-alpha	0.0491406	1.27978	-0.207355	0.887881	0.000296906	0.552221	1	0.0115299	0.746947
PDACT_KE332558.1_G004040	Receptor homology region, transmembrane domain- and RING domain-containing protein 1	0.141174	-1.60644	-1.79124	0.744549	0.000302338	6.23289e-05	1	0.0117223	0.00146575
PDACT_KE332564.1_G003300	alpha/beta-Hydrolases superfamily protein LENGTH=502	-0.0721269	-1.08207	-0.978497	0.807078	0.000303654	0.00107647	1	0.0117362	0.0122349
PDACT_KE332603.1_G002020	rapid alkalinization factor 1 LENGTH=120	-0.308609	2.19313	1.70907	0.598222	0.000303176	0.00428134	1	0.0117362	0.0332099
PDACT_KE332578.1_G001380	Protein kinase superfamily protein LENGTH=836	-0.0308801	-0.988473	-0.5972	0.90913	0.000304656	0.0280974	1	0.0117564	0.120107
PDACT_KE332867.1_G000460	nudix hydrolase homolog 12 LENGTH=203	0.429976	-2.81241	0.594624	0.55624	0.00030729	0.416754	1	0.0118394	0.643933
PDACT_KE333090.1_G000240	RNA binding LENGTH=901	-0.0334937	1.03094	1.09249	0.905897	0.000308734	0.000134645	1	0.0118763	0.00262061
PDACT_KE333013.1_G000710	Hypoxia-responsive family protein LENGTH=97	0.360998	1.45014	2.20187	0.365418	0.000311196	8.18804e-08	1	0.0119523	8.50169e-06
PDACT_KE332567.1_G004130	Elongation factor 1-alpha	0.222378	1.14751	0.379223	0.479821	0.000312584	0.22866	1	0.0119868	0.456685
PDACT_KE332561.1_G000640	Ras-related protein Rab-6A	0.146017	-1.29195	-1.61484	0.678367	0.000315515	8.41877e-06	1	0.0120674	0.000317369
PDACT_KE332736.1_G000300	RNA binding protein PDE312 n=6 Tax=Brassicaceae RepID=F4JF21 ARATH	-0.479559	1.33531	1.33868	0.190855	0.00031567	0.000305829	1	0.0120674	0.00485679
PDACT_KE332901.1_G000350	PLAC8 family protein LENGTH=232	0.52677	1.2198	1.17046	0.116475	0.000317243	0.000546204	1	0.0120932	0.00748975
PDACT_KE332575.1_G000300	myosin 1 LENGTH=1520	-0.195271	-1.83577	-0.0825201	0.69196	0.000317332	0.86696	1	0.0120932	0.93761
PDACT_KE332659.1_G001480	Cornichon family protein LENGTH=146	0.815085	1.7289	1.63	0.0865534	0.000318712	0.000691563	1	0.0121167	0.00885837
PDACT_KE332626.1_G000230	Acetamidase/Formamidase family protein LENGTH=452	-0.276781	-1.53321	-1.22219	0.50636	0.000318939	0.00382903	1	0.0121167	0.0307326
PDACT_KE332699.1_G000590	Transcription initiation factor TFIID subunit 6	-0.0085024	-0.966088	-0.760036	0.974467	0.00032289	0.00455432	1	0.0122478	0.0345615
PDACT_KE333276.1_G000120	Spc97 / Spc98 family of spindle pole body (SBP) component LENGTH=995	-0.582059	2.18586	2.73191	0.329426	0.00032457	1.06904e-05	1	0.0122925	0.000381305
PDACT_KE332553.1_G005190	Glutathione S-transferase family protein LENGTH=219	1.00733	3.10371	1.99376	0.209468	0.000325405	0.0158081	1	0.0123051	0.0813444
PDACT_KE332584.1_G001280	FRIGIDA-like protein LENGTH=558	-0.0582897	-0.924567	-1.12643	0.819035	0.000327481	1.34596e-05	1	0.0123569	0.000449065
PDACT_KE333667.1_G000130	spermidine synthase 3 LENGTH=386	-0.00871452	0.971756	0.690193	0.974169	0.000327782	0.0104974	1	0.0123569	0.0616707
PDACT_KE332597.1_G002520	Omega-3 fatty acid desaturase, chloroplastic	0.297296	-2.29104	-3.29113	0.625623	0.000333984	7.92648e-07	1	0.012552	5.01887e-05
PDACT_KE332548.1_G004270	Rhodanese-like domain-containing protein 10	-0.245461	-1.25249	-1.59474	0.475303	0.000333658	6.13045e-06	1	0.012552	0.000243469
PDACT_KE332555.1_G005260	Rho GTPase-activating protein 3	0.614626	2.06238	3.77914	0.277518	0.000335653	6.46713e-10	1	0.0125955	1.66811e-07
PDACT_KE332591.1_G001120	Plant regulator RWP-RK family protein LENGTH=894	-0.362662	-1.2787	-2.13475	0.301781	0.000338128	6.42113e-09	1	0.0126689	1.1742e-06
PDACT_KE333987.1_G000150	BAG family molecular chaperone regulator 8, chloroplastic	-0.232989	1.54901	1.57106	0.587076	0.00033999	0.000284151	1	0.0127193	0.00461265
PDACT_KE332688.1_G000740	Alanine--tRNA ligase	0.116602	-1.13418	-0.686937	0.709075	0.00034158	0.0287973	1	0.0127592	0.12202
PDACT_KE332674.1_G002070	DA1 LENGTH=532	0.0180116	1.27897	1.79947	0.959238	0.000345375	6.90475e-07	1	0.0127648	4.49984e-05
PDACT_KE332556.1_G000670	RING/FYVE/PHD zinc finger superfamily protein LENGTH=288	0.11176	-1.07003	-1.19301	0.704626	0.000344232	7.05064e-05	1	0.0127648	0.00161769
PDACT_KE333070.1_G000730	Ent-kaurene synthase-like 3	-1.34569	-2.52247	-2.27487	0.0470505	0.000343601	0.00114642	1	0.0127648	0.0128391
PDACT_KE334854.1_G000110	Non-specific lipid-transfer protein 1	-0.318495	1.33551	1.18995	0.385756	0.000345077	0.00137546	1	0.0127648	0.0146923
PDACT_KE333342.1_G000310	unknown protein; Has 30201 Blast hits to 17322 proteins in 780 species: Archae - 12; Bacteria - 1396; Metazoa - 17338; Fungi - 3422; Plants - 5037; Viruses - 0; Other Eukaryotes - 2996 (source: NCBI BLink). LENGTH=140	-0.00685946	1.17281	0.956043	0.983174	0.000345302	0.00345477	1	0.0127648	0.0287377
PDACT_KE332878.1_G000820	unknown protein; FUNCTIONS IN: molecular function unknown; INVOLVED IN: biological process unknown; LOCATED IN: chloroplast; EXPRESSED IN: 23 plant structures; EXPRESSED DURING: 13 growth stages; Has 24 Blast hits to 24 proteins in 8 species: Archae - 0; Bacteria - 0; Metazoa - 0; Fungi - 0; Plants - 24; Viruses - 0; Other Eukaryotes - 0 (source: NCBI BLink). LENGTH=179	-0.422779	1.23638	0.736121	0.21757	0.000345245	0.0318023	1	0.0127648	0.129837
PDACT_KE332569.1_G003640	U-box domain-containing protein LENGTH=400	0.0175714	-2.3811	-0.974032	0.977682	0.000343932	0.126853	1	0.0127648	0.317702
PDACT_KE332872.1_G000350	oligopeptide transporter 7 LENGTH=766	-0.866593	-1.97958	-3.47428	0.106887	0.00034734	3.62625e-09	1	0.0127796	7.34362e-07
PDACT_KE332868.1_G000490	Genomic DNA, chromosome 3, P1 clone: MXC7 n=3 Tax=Arabidopsis thaliana RepID=Q9LS82 ARATH	0.170474	2.13151	2.02525	0.767844	0.000346573	0.000652424	1	0.0127796	0.00851056
PDACT_KE332602.1_G003080	unknown protein; BEST Arabidopsis thaliana protein match is: unknown protein . LENGTH=331	0.284991	-1.05004	-0.905463	0.325568	0.000353342	0.00202738	1	0.012981	0.0195972
PDACT_KE332580.1_G003200	Pyruvate kinase family protein LENGTH=527	0.1916	-1.46388	-1.86339	0.632303	0.000354829	7.75803e-06	1	0.0130161	0.000298075
PDACT_KE332771.1_G000860	zinc finger (Ran-binding) family protein LENGTH=758	-0.0372643	1.14629	1.0856	0.90698	0.000357164	0.000717814	1	0.0130821	0.00905732
PDACT_KE332713.1_G001370	calcineurin B-like protein 8 LENGTH=214	-0.171822	-1.70292	-2.83222	0.710316	0.000358225	1.75476e-08	1	0.0130841	2.59029e-06
PDACT_KE332673.1_G000360	Protein kinase superfamily protein LENGTH=824	0.000460988	1.87129	1.57571	0.999329	0.000358286	0.00247264	1	0.0130841	0.0226751
PDACT_KE332567.1_G004450	unknown protein; Has 59 Blast hits to 59 proteins in 24 species: Archae - 0; Bacteria - 0; Metazoa - 26; Fungi - 4; Plants - 29; Viruses - 0; Other Eukaryotes - 0 (source: NCBI BLink). LENGTH=215	0.135117	-0.993192	-0.948562	0.623066	0.000360126	0.000658697	1	0.013126	0.00857635
PDACT_KE332646.1_G000740	small ubiquitin-like modifier 1 LENGTH=100	0.346254	1.07329	0.985591	0.245373	0.000360504	0.00103524	1	0.013126	0.011904
PDACT_KE338856.1_G000100	Major pollen allergen Bet v 1-L	-1.10983	-4.07918	-6.33638	0.27773	0.000362404	6.19239e-07	1	0.0131756	4.18491e-05
PDACT_KE332833.1_G000790	Chloroplast unusual positioning 1A n=1 Tax=Medicago truncatula RepID=G7IB73 MEDTR	0.303202	1.37361	2.15716	0.426048	0.000363707	4.34878e-08	1	0.0132034	5.00293e-06
PDACT_KE332781.1_G001060	Pentatricopeptide repeat-containing protein	0.282029	1.84242	1.28155	0.579563	0.000368451	0.012223	1	0.0133361	0.0680246
PDACT_KE333108.1_G000130	Auxin-responsive protein IAA1	0.38196	-1.15982	-0.774214	0.234525	0.000368192	0.016686	1	0.0133361	0.0844084
PDACT_KE332546.1_G008180	Syntaxin-32	-0.144902	-1.03984	-0.985214	0.614843	0.000369759	0.000752803	1	0.0133637	0.0093924
PDACT_KE332699.1_G000620	Protein FLUORESCENT IN BLUE LIGHT, chloroplastic	-0.14624	0.978025	1.01193	0.592761	0.000371924	0.000234328	1	0.0134024	0.00401536
PDACT_KE332698.1_G002470	Encodes a nucleus-encoded thylakoid protein, cooperates with the plastid-encoded Ycf3 protein in photosystem i assembly. Also induces tolerance to multiple environmental stresses and reduces photooxidative damage. LENGTH=280	-0.327122	-0.903409	-0.917956	0.194007	0.000371883	0.000302647	1	0.0134024	0.00481562
PDACT_KE332546.1_G001380	10 kDa chaperonin	0.288754	1.35471	1.0791	0.440834	0.000375293	0.00435956	1	0.0135039	0.0336038
PDACT_KE332681.1_G001100	Protein kinase superfamily protein LENGTH=512	-0.472486	1.8792	2.30226	0.369998	0.000377459	1.744e-05	1	0.0135421	0.000554278
PDACT_KE332566.1_G001500	5'-3' exonuclease family protein LENGTH=347	0.388229	1.62834	1.7124	0.391969	0.000377306	0.000194	1	0.0135421	0.0034573
PDACT_KE332632.1_G001150	poly(A) polymerase 3 LENGTH=507	0.239318	1.23078	1.48714	0.486646	0.000379607	1.97786e-05	1	0.0135993	0.000611165
PDACT_KE333154.1_G000190	UDP-glucuronic acid decarboxylase 1 LENGTH=458	0.271181	-1.1422	-0.996276	0.392204	0.000381343	0.00189894	1	0.0136415	0.0186574
PDACT_KE332718.1_G001430	phloem protein 2-A1 LENGTH=246	-0.41299	-1.80474	-0.00543712	0.402415	0.000384602	0.991185	1	0.013738	0.997044
PDACT_KE332583.1_G002570	trehalose-6-phosphate phosphatase LENGTH=374	0.335344	-1.81199	-2.6218	0.492963	0.000389143	1.01379e-06	1	0.0138278	6.19501e-05
PDACT_KE332740.1_G000120	Plant protein of unknown function (DUF247) LENGTH=509	-0.340686	3.7363	2.5603	0.716152	0.000389373	0.0103899	1	0.0138278	0.0612448
PDACT_KE333247.1_G000470	NADP-dependent malic enzyme	0.425246	1.58008	2.18483	0.335315	0.000390189	1.42416e-06	1	0.0138368	8.10279e-05
PDACT_KE332674.1_G000790	RNA-binding protein 1 LENGTH=360	0.198596	1.38887	1.58137	0.609544	0.000392276	5.92426e-05	1	0.0138906	0.00141077
PDACT_KE333298.1_G000120	Superoxide dismutase [Cu-Zn]	0.574405	1.90126	3.27698	0.270488	0.000393991	7.06677e-09	1	0.0139313	1.27326e-06
PDACT_KE333146.1_G000350	unknown protein; FUNCTIONS IN: molecular function unknown; INVOLVED IN: biological process unknown; LOCATED IN: endomembrane system; EXPRESSED IN: 24 plant structures; EXPRESSED DURING: 15 growth stages; Has 30201 Blast hits to 17322 proteins in 780 species: Archae - 12; Bacteria - 1396; Metazoa - 17338; Fungi - 3422; Plants - 5037; Viruses - 0; Other Eukaryotes - 2996 (source: NCBI BLink). LENGT…	0.146402	0.977862	0.985756	0.593037	0.000394688	0.000356069	1	0.0139358	0.0054316
PDACT_KE332699.1_G001360	SHV3-like 1 LENGTH=766	-0.31332	2.03713	3.67081	0.581236	0.000399876	2.0137e-09	1	0.0140986	4.48578e-07
PDACT_KE332608.1_G002880	Pentatricopeptide repeat-containing protein	-0.415899	1.39155	1.40499	0.286246	0.000401209	0.000356211	1	0.0141253	0.0054316
PDACT_KE333227.1_G000330	receptor-like kinase 1 LENGTH=655	-0.277505	-1.97204	-1.69369	0.605679	0.000403596	0.00219801	1	0.014189	0.0208356
PDACT_KE332921.1_G000470	Inositol hexakisphosphate and diphosphoinositol-pentakisphosphate kinase 2	-0.297061	-1.84487	-2.47335	0.555165	0.000405618	4.20536e-06	1	0.0142202	0.000181752
PDACT_KE332737.1_G001380	Protein of unknown function (DUF3049) LENGTH=463	-0.109142	-1.28114	-1.44252	0.758922	0.000405645	7.49491e-05	1	0.0142202	0.00168956
PDACT_KE332707.1_G000950	Mitochondrial substrate carrier family protein LENGTH=300	-0.588242	-1.33167	-2.02364	0.113483	0.000409716	1.45657e-07	1	0.0143219	1.34686e-05
PDACT_KE332839.1_G000700	RNA-binding protein 42	-0.289182	1.00979	1.2207	0.309582	0.000411897	2.12917e-05	1	0.0143777	0.000644909
PDACT_KE332553.1_G003090	Thioredoxin superfamily protein LENGTH=233	0.453487	1.11914	1.27474	0.150731	0.000414805	6.16643e-05	1	0.0144586	0.00145291
PDACT_KE332890.1_G000300	E3 ubiquitin-protein ligase COP1	-0.154269	-1.54639	-2.60996	0.718455	0.000415457	1.0302e-08	1	0.0144588	1.62864e-06
PDACT_KE333171.1_G000560	Dual-specificity RNA methyltransferase RlmN	-0.477101	0.956425	0.757083	0.0780047	0.00041599	0.00510256	1	0.0144588	0.0374463
PDACT_KE332580.1_G003280	DUF218 domain protein n=1 Tax=Penicillium marneffei (strain ATCC 18224 / CBS 334.59 / QM 7333) RepID=B6QW33 PENMQ	0.344896	1.73432	2.27222	0.475709	0.000420185	5.59551e-06	1	0.0145632	0.000226632
PDACT_KE332784.1_G000580	unknown protein; Has 27 Blast hits to 27 proteins in 10 species: Archae - 0; Bacteria - 0; Metazoa - 0; Fungi - 0; Plants - 27; Viruses - 0; Other Eukaryotes - 0 (source: NCBI BLink). LENGTH=241	0.462545	0.96372	0.693699	0.0892219	0.000419926	0.0109779	1	0.0145632	0.0633647
PDACT_KE332646.1_G000560	sucrose phosphate synthase 3F LENGTH=1062	-0.100906	-1.59997	-2.29832	0.819853	0.000424359	7.5748e-07	1	0.0146679	4.82111e-05
PDACT_KE332552.1_G007730	AFG1-like ATPase family protein LENGTH=655	0.0148477	-0.876568	-0.71411	0.951928	0.000424401	0.00401686	1	0.0146679	0.0317545
PDACT_KE332794.1_G000710	alpha/beta-Hydrolases superfamily protein LENGTH=369	-0.111264	-1.0401	-0.525357	0.702984	0.000425647	0.072856	1	0.0146902	0.224364
PDACT_KE332621.1_G001570	GDSL esterase/lipase	1.45144	-2.7963	-4.09077	0.0596353	0.000426636	9.61732e-07	1	0.0147037	5.92117e-05
PDACT_KE332574.1_G002080	Peptidoglycan-binding domain-containing family protein n=1 Tax=Populus trichocarpa RepID=B9GME6 POPTR	-0.261054	1.13473	1.31009	0.412857	0.000429707	5.1454e-05	1	0.0147887	0.00127228
PDACT_KE332703.1_G000900	fructokinase-like 1 LENGTH=471	-0.0203726	1.03788	1.03971	0.944594	0.000433312	0.000426497	1	0.0148918	0.00618395
PDACT_KE333403.1_G000150	Ribosome-inactivating protein n=1 Tax=Beauveria bassiana (strain ARSEF 2860) RepID=J5JPL8 BEAB2	-1.04353	4.73449	4.9999	0.344897	0.000436556	0.000247588	1	0.0149823	0.00418955
PDACT_KE332763.1_G001060	Serine/arginine-rich splicing factor 2	0.166315	0.932252	0.855842	0.527424	0.000437637	0.00123168	1	0.0149906	0.0135767
PDACT_KE332852.1_G000640	5'-nucleotidase SurE	-0.0212449	-1.42486	-1.16078	0.957095	0.000438022	0.00401726	1	0.0149906	0.0317545
PDACT_KE332620.1_G001720	Family of unknown function (DUF716) LENGTH=300	-0.495571	3.8252	2.29586	0.529615	0.000439879	0.0202375	1	0.0150332	0.0963284
PDACT_KE332767.1_G000880	lecithin:cholesterol acyltransferase 3 LENGTH=447	0.159671	1.41213	2.09399	0.688441	0.0004442	3.19485e-07	1	0.0150757	2.46184e-05
PDACT_KE332766.1_G000880	Nucleotide-sugar transporter family protein LENGTH=308	-0.118045	1.53177	1.32912	0.785822	0.000443797	0.00224873	1	0.0150757	0.0211771
PDACT_KE332553.1_G004630	U-box domain-containing protein 44	0.0154092	-1.68351	-1.8699	0.973445	0.000445659	0.000119038	1	0.0151043	0.00239483
PDACT_KE332557.1_G005500	Arabidopsis thaliana protein of unknown function (DUF794) LENGTH=402	0.272731	1.19146	1.15186	0.417695	0.000446816	0.000687355	1	0.0151226	0.00882291
PDACT_KE332772.1_G000100	Cystathionine gamma-lyase	0.0408784	-1.18004	-2.56955	0.901876	0.000451772	3.1626e-13	1	0.0152693	2.67229e-10
PDACT_KE332626.1_G001630	Two-component response regulator ARR1	-0.137281	1.28697	0.903024	0.704573	0.000455804	0.0132155	1	0.0153843	0.0718474
PDACT_KE332640.1_G001270	unknown protein; BEST Arabidopsis thaliana protein match is: unknown protein . LENGTH=208	0.991825	2.09439	3.56426	0.0886624	0.000456661	1.85943e-08	1	0.015392	2.69682e-06
PDACT_KE332580.1_G003320	Transmembrane protein 184C	0.0462134	1.51344	1.85411	0.913689	0.000458588	2.13672e-05	1	0.0154079	0.000646398
PDACT_KE332585.1_G000140	Riboflavin biosynthesis protein RibD	0.544066	1.41238	0.72531	0.17186	0.000459647	0.068905	1	0.0154079	0.21608
PDACT_KE332594.1_G003020	MADS-box transcription factor family protein LENGTH=248	2.77014	-3.19523	-0.865751	0.0313854	0.00045949	0.444433	1	0.0154079	0.667099
PDACT_KE332614.1_G001720	ATP-dependent RNA helicase DED1	-0.29872	-1.14798	-1.10321	0.356214	0.000461732	0.000759063	1	0.0154567	0.00946087
PDACT_KE332865.1_G000770	Protein WEAK CHLOROPLAST MOVEMENT UNDER BLUE LIGHT 1	-0.128954	-1.24163	-1.2996	0.712029	0.000465387	0.000256339	1	0.0155366	0.00428759
PDACT_KE332586.1_G001020	alpha/beta-Hydrolases superfamily protein LENGTH=514	0.226216	-1.07626	-1.42166	0.456571	0.000468708	4.77156e-06	1	0.0156016	0.000199773
PDACT_KE332549.1_G002720	Calmodulin-binding protein LENGTH=599	-0.00719059	-1.567	-1.94926	0.986821	0.000469244	2.01932e-05	1	0.0156016	0.000622511
PDACT_KE332557.1_G005870	high mobility group B2 LENGTH=144	0.2008	-1.18567	-1.30816	0.548197	0.000468007	0.000118848	1	0.0156016	0.00239417
PDACT_KE332625.1_G000880	unknown protein; BEST Arabidopsis thaliana protein match is: unknown protein . LENGTH=896	0.203919	1.20131	1.12003	0.552067	0.00047503	0.00112848	1	0.0157726	0.0126845
PDACT_KE337238.1_G000120	n=1 Tax=Oryza sativa subsp. japonica RepID=Q7XX19 ORYSJ	-0.124525	-2.68457	-0.473172	0.865417	0.000477855	0.520666	1	0.0158449	0.724169
PDACT_KE332928.1_G000570	AP2-like ethylene-responsive transcription factor	0.043398	-1.01236	-1.06274	0.879675	0.000480535	0.000253648	1	0.0159122	0.00426295
PDACT_KE332654.1_G001880	cytochrome c-2 LENGTH=112	0.585532	1.42252	1.12248	0.146536	0.000483012	0.00566059	1	0.0159726	0.0403218
PDACT_KE332647.1_G001220	elongation factor Ts family protein LENGTH=953	0.750329	1.56903	1.46479	0.0921412	0.0004868	0.00111456	1	0.0160762	0.0125684
PDACT_KE332931.1_G000610	Sphingosine-1-phosphate lyase	-0.188706	-1.09864	-1.00834	0.543886	0.000487519	0.00136003	1	0.0160783	0.0145732
PDACT_KE333070.1_G000480	Protein CHUP1 n=1 Tax=Medicago truncatula RepID=G7JX26 MEDTR	-0.304418	-1.3813	-1.67783	0.434217	0.00048857	2.66197e-05	1	0.0160913	0.000767747
PDACT_KE332670.1_G001890	Lipid phosphate phosphatase delta	0.0287059	-1.13491	-1.33608	0.928786	0.000495408	4.62089e-05	1	0.0162946	0.00117533
PDACT_KE332619.1_G000830	Protein kinase superfamily protein LENGTH=404	1.88807	3.95531	3.24008	0.052317	0.000496482	0.00268704	1	0.016308	0.0239954
PDACT_KE332721.1_G001270	Heat stress transcription factor A-1	0.0956178	1.22039	1.43354	0.783538	0.000499571	4.74457e-05	1	0.0163493	0.00119733
PDACT_KE332760.1_G001050	General transcription factor IIH subunit 3	0.061057	0.96195	0.975685	0.824402	0.000500209	0.000422064	1	0.0163493	0.0061342
PDACT_KE332599.1_G002720	UDP-Glycosyltransferase superfamily protein LENGTH=489	-1.33508	-3.04226	-2.9644	0.104798	0.000500406	0.000669234	1	0.0163493	0.00868126
PDACT_KE332589.1_G002390	U-box domain-containing protein 4	0.11546	-1.03653	-0.409074	0.694627	0.000507512	0.165995	1	0.0165593	0.376108
PDACT_KE332782.1_G000390	UDP-glucose 4-epimerase	0.378938	1.9378	1.46537	0.482988	0.000509313	0.00770276	1	0.016596	0.0498412
PDACT_KE332731.1_G000640	Pterin-4-alpha-carbinolamine dehydratase	0.299089	0.917093	1.32502	0.255447	0.000514504	6.39757e-07	1	0.0167429	4.25995e-05
PDACT_KE332548.1_G001250	Protein kinase superfamily protein LENGTH=525	0.181298	1.29908	1.29438	0.625231	0.000518798	0.000550064	1	0.0168379	0.00753004
PDACT_KE332550.1_G002540	Protein of unknown function (DUF579) LENGTH=317	0.366624	-1.69195	-0.728609	0.438638	0.000520833	0.126537	1	0.0168816	0.317171
PDACT_KE332628.1_G000550	Farnesyl pyrophosphate synthase 1	-0.0662941	1.43668	1.32824	0.871108	0.000521968	0.00131904	1	0.016896	0.0143144
PDACT_KE332579.1_G000430	Histone-lysine N-methyltransferase 2A	0.0558409	1.82471	2.05163	0.913464	0.00052414	0.000108961	1	0.016944	0.00223803
PDACT_KE333437.1_G000180	proteinaceous RNase P 1 LENGTH=572	-0.395298	-1.20841	-1.18024	0.250283	0.000525382	0.000706007	1	0.0169617	0.00898235
PDACT_KE333912.1_G000110	unknown protein; BEST Arabidopsis thaliana protein match is: unknown protein . LENGTH=439	0.195695	1.05814	1.10807	0.520227	0.000527391	0.000291889	1	0.0170042	0.0046932
PDACT_KE332632.1_G001280	Pentatricopeptide repeat-containing protein	0.197531	1.41125	1.53866	0.625532	0.00052912	0.000166622	1	0.0170097	0.00306985
PDACT_KE332651.1_G001320	Mitochondrial substrate carrier family protein LENGTH=296	-0.255883	-1.12926	-0.854766	0.426071	0.000529646	0.00839083	1	0.0170097	0.0529378
PDACT_KE332579.1_G002360	Ethylene-responsive transcription factor 5	-0.0928455	1.74682	0.444305	0.850011	0.000528519	0.366105	1	0.0170097	0.598268
PDACT_KE332703.1_G001190	Activating signal cointegrator 1 complex subunit 3	-0.162055	-0.88692	-1.22745	0.523222	0.000533199	2.01972e-06	1	0.0170225	0.000104854
PDACT_KE332555.1_G001880	ACT domain-containing protein LENGTH=411	-0.131611	-1.1877	-1.23258	0.696984	0.000533045	0.00033222	1	0.0170225	0.00514771
PDACT_KE332858.1_G000400	Fe superoxide dismutase 2 LENGTH=305	0.137501	0.978174	0.841201	0.623679	0.000532044	0.00284061	1	0.0170225	0.0249489
PDACT_KE332603.1_G002110	Single hybrid motif superfamily protein LENGTH=263	0.523288	0.974702	0.81967	0.0614648	0.000532546	0.00351203	1	0.0170225	0.0290249
PDACT_KE332735.1_G000820	Chaperone protein DnaJ	1.98434	-2.91144	-0.895555	0.0405262	0.000533516	0.321862	1	0.0170225	0.555777
PDACT_KE332674.1_G002080	DA1 LENGTH=532	0.0429989	1.32236	1.56487	0.909971	0.000535018	4.62862e-05	1	0.0170482	0.00117533
PDACT_KE332893.1_G000380	Membrane-associated phosphatidylinositol transfer protein 1	0.305471	0.9613	1.24845	0.269477	0.000536551	7.79499e-06	1	0.0170749	0.000298485
PDACT_KE333163.1_G000340	Inosine-5'-monophosphate dehydrogenase	0.124522	1.50929	2.50667	0.771561	0.000539353	2.62899e-08	1	0.0170974	3.44496e-06
PDACT_KE333387.1_G000220	F-box/LRR-repeat protein 2	0.0377304	0.908781	1.37723	0.885618	0.000538869	1.99883e-07	1	0.0170974	1.71256e-05
PDACT_KE332752.1_G000630	beta glucosidase 13 LENGTH=507	-0.131665	-0.942526	-1.10513	0.62555	0.000539108	5.30208e-05	1	0.0170974	0.00129792
PDACT_KE333360.1_G000220	alpha/beta-Hydrolases superfamily protein LENGTH=324	-0.0787725	-0.988394	-1.55278	0.78065	0.00054244	8.49978e-08	1	0.0171731	8.6364e-06
PDACT_KE333331.1_G000200	calcium dependent protein kinase 1 LENGTH=610	-0.223069	-1.03349	-1.40994	0.450682	0.000548218	3.04038e-06	1	0.0173336	0.00014245
PDACT_KE332641.1_G001420	Signal recognition particle protein	0.247087	-1.04514	-1.29008	0.406892	0.000550183	2.40588e-05	1	0.0173733	0.000707728
PDACT_KE332580.1_G003190	Chaperone protein DnaJ	0.0894163	-1.32672	-1.52329	0.812757	0.000552453	8.04305e-05	1	0.0174225	0.00177655
PDACT_KE332545.1_G005400	rhomboid-like protein 11 LENGTH=280	0.324801	1.27202	1.45233	0.372585	0.000558482	8.76698e-05	1	0.01759	0.00189861
PDACT_KE333139.1_G000640	Magnesium transporter MRS2-3	-0.397733	-1.29553	-2.19315	0.281032	0.000559409	1.87314e-08	1	0.0175952	2.69682e-06
PDACT_KE332692.1_G001340	F-box family protein LENGTH=371	0.385407	1.01751	1.05884	0.188306	0.000560081	0.000335506	1	0.0175952	0.00518798
PDACT_KE332545.1_G008890	Vacuolar protein-sorting protein BRO1	-0.102493	-0.960208	-1.2021	0.709643	0.00056247	1.84028e-05	1	0.0176255	0.000576503
PDACT_KE332586.1_G001860	Phosphatidylinositol-4-phosphate 5-kinase family protein LENGTH=754	-0.0451149	-1.05094	-1.33066	0.880595	0.000570678	1.60977e-05	1	0.0177868	0.000519022
PDACT_KE332624.1_G002250	Suppressor of G2 allele of SKP1 homolog	0.0399254	1.503	1.68623	0.925612	0.000569305	0.000120375	1	0.0177868	0.00241508
PDACT_KE332549.1_G006440	purple acid phosphatase 3 LENGTH=366	0.435684	2.51947	2.54093	0.529544	0.000570815	0.000534009	1	0.0177868	0.00735959
PDACT_KE332699.1_G000630	Protein FLUORESCENT IN BLUE LIGHT, chloroplastic	0.127419	1.14587	1.38974	0.699586	0.000572447	3.2612e-05	1	0.0178011	0.000893874
PDACT_KE332560.1_G003150	RING/U-box superfamily protein LENGTH=254	0.198663	-0.952027	-1.02021	0.467994	0.000581498	0.00023594	1	0.0180596	0.00402891
PDACT_KE332576.1_G002340	Leucine-rich receptor-like protein kinase family protein LENGTH=960	-0.768778	-2.25557	-2.64133	0.222395	0.000589341	9.30957e-05	1	0.01828	0.00198194
PDACT_KE332582.1_G001070	calmodulin 7 LENGTH=149	0.200117	1.01632	0.927114	0.494719	0.00059029	0.00169399	1	0.0182863	0.0171315
PDACT_KE332573.1_G001850	Pre-mRNA-splicing regulator WTAP	-0.413263	1.02896	0.609048	0.165418	0.000592256	0.0409022	1	0.018324	0.152785
PDACT_KE332782.1_G000660	BTB/POZ domain-containing protein LENGTH=441	-0.0330456	-0.927935	-0.924566	0.901757	0.000596331	0.000629034	1	0.0184269	0.00832909
PDACT_KE332579.1_G000480	expansin-like B1 LENGTH=250	-0.40004	6.3181	6.93431	0.545368	0.00059829	0.000288334	1	0.0184641	0.00466752
PDACT_KE332678.1_G001280	Transcription factor HEC2	1.19807	3.35415	3.7736	0.0367016	0.00060889	0.000292401	1	0.0187676	0.00469528
PDACT_KE333066.1_G000300	Cytochrome P450 superfamily protein LENGTH=513	-1.25977	-2.06907	-1.93444	0.0326149	0.000610868	0.0013092	1	0.0188049	0.0142518
PDACT_KE332562.1_G002160	L-aspartate oxidase LENGTH=651	0.698752	-1.31851	-1.75764	0.0659464	0.000612023	6.52825e-06	1	0.0188168	0.000256359
PDACT_KE332654.1_G001200	Protein SUPPRESSOR OF GENE SILENCING 3 homolog	-0.0849018	0.902234	1.32397	0.745996	0.000613788	6.2015e-07	1	0.0188474	4.18491e-05
PDACT_KE333154.1_G000180	UDP-glucuronic acid decarboxylase 1 LENGTH=458	-0.00438898	-1.28148	-1.41837	0.990474	0.000620906	0.000165631	1	0.0190422	0.0030608
PDACT_KE332822.1_G000140	nitrate transporter 2.4 LENGTH=527	-0.0145566	-1.72694	-3.00967	0.976256	0.000624975	2.08206e-08	1	0.019143	2.93211e-06
PDACT_KE332805.1_G000460	3-phosphoshikimate 1-carboxyvinyltransferase 2	-0.144679	-1.63936	-2.75549	0.75626	0.000630583	4.45635e-08	1	0.0191808	5.079e-06
PDACT_KE332647.1_G001840	galacturonosyltransferase 4 LENGTH=616	0.350606	0.971757	1.10459	0.215225	0.000630764	0.000106698	1	0.0191808	0.00220263
PDACT_KE332617.1_G001500	RING/FYVE/PHD zinc finger superfamily protein LENGTH=207	0.0956185	-1.22235	-1.30945	0.785463	0.000626997	0.000264108	1	0.0191808	0.00437869
PDACT_KE332825.1_G000320	Ras-related protein Rab-25	0.108106	1.37941	1.39666	0.786692	0.000630905	0.000547174	1	0.0191808	0.00749885
PDACT_KE332611.1_G000480	Metallophosphoesterase 1	0.0504609	-1.01825	-0.728388	0.863385	0.000630275	0.0140435	1	0.0191808	0.0750537
PDACT_KE332553.1_G004790	Histone superfamily protein LENGTH=103	1.17156	-1.93302	-0.727988	0.0336552	0.00063041	0.184833	1	0.0191808	0.400951
PDACT_KE332556.1_G001470	F-box/kelch-repeat protein	-0.116637	-0.996579	-0.679694	0.685595	0.00063655	0.0192526	1	0.0193045	0.0931777
PDACT_KE332796.1_G001000	Unknown protein	0.123739	-4.51234	1.30483	0.924187	0.000638519	0.327469	1	0.0193403	0.562
PDACT_KE334029.1_G000110	phospholipase D P2 LENGTH=1046	-0.550986	-3.64566	-3.07032	0.58152	0.000640017	0.00380707	1	0.0193617	0.0306265
PDACT_KE332794.1_G001200	ERD (early-responsive to dehydration stress) family protein LENGTH=772	0.238158	1.25403	1.46897	0.51209	0.000642716	6.99234e-05	1	0.0193716	0.00160732
PDACT_KE332563.1_G002410	Lung seven transmembrane receptor family protein LENGTH=513	0.194753	0.856202	0.820774	0.435892	0.000641855	0.00107104	1	0.0193716	0.0121932
PDACT_KE332583.1_G000140	maternal effect embryo arrest 9 LENGTH=147	0.313266	1.21664	0.921523	0.374653	0.000642013	0.00940768	1	0.0193716	0.057245
PDACT_KE333077.1_G000220	S-adenosyl-L-methionine-dependent methyltransferases superfamily protein LENGTH=371	0.843393	2.15608	1.99258	0.167321	0.000646788	0.00152597	1	0.0194704	0.0158443
PDACT_KE332553.1_G006140	receptor-like kinase 1 LENGTH=655	0.187003	-2.38408	-2.33875	0.77799	0.000648467	0.000861675	1	0.0194731	0.0103502
PDACT_KE332821.1_G000730	Nucleoporin NUP53	0.75878	1.83761	1.60926	0.150548	0.000647723	0.00266299	1	0.0194731	0.0239025
PDACT_KE332667.1_G000540	Fatty acid hydroxylase superfamily LENGTH=630	-0.938209	4.87004	2.47961	0.0660003	0.000656041	0.0343462	1	0.0196524	0.136566
PDACT_KE332621.1_G002080	unknown protein; BEST Arabidopsis thaliana protein match is: unknown protein . LENGTH=426	0.312517	-0.924415	-0.334933	0.244498	0.000655981	0.213461	1	0.0196524	0.437697
PDACT_KE332611.1_G001090	unknown protein; BEST Arabidopsis thaliana protein match is: unknown protein . LENGTH=299	0.043772	1.1343	0.891331	0.894809	0.000661783	0.00729863	1	0.0198001	0.0479116
PDACT_KE332572.1_G000220	Plant invertase/pectin methylesterase inhibitor superfamily protein LENGTH=194	0.0511987	1.64237	0.844078	0.913974	0.000666183	0.0759874	1	0.0198832	0.229848
PDACT_KE334049.1_G000120	Protein of unknown function (DUF3411) LENGTH=386	-0.685919	-1.78106	-2.4304	0.177906	0.000668681	6.46376e-06	1	0.0199335	0.000254234
PDACT_KE332582.1_G000210	Histone superfamily protein LENGTH=178	0.503098	-1.16526	-1.21218	0.134782	0.000672528	0.000432211	1	0.0200238	0.00622628
PDACT_KE334254.1_G000130	3-hydroxy-3-methylglutaryl-coenzyme A reductase	-0.061945	1.8657	1.77857	0.908347	0.000673824	0.0011622	1	0.0200381	0.0129742
PDACT_KE332591.1_G000530	RING/FYVE/PHD zinc finger superfamily protein LENGTH=288	0.0676109	1.38862	1.48288	0.867061	0.00067589	0.000294063	1	0.0200752	0.00471669
PDACT_KE332556.1_G000570	HNH endonuclease LENGTH=234	-0.0134269	-0.984504	-0.547213	0.962652	0.000677001	0.0572405	1	0.0200838	0.191354
PDACT_KE333053.1_G000400	ABL interactor-like protein 2 LENGTH=312	0.00438266	1.3094	1.98375	0.990923	0.000678859	4.27306e-07	1	0.0200857	3.16993e-05
PDACT_KE332630.1_G002070	plastid developmental protein DAG, putative LENGTH=232	-0.920041	-2.51689	-3.72898	0.192917	0.000680344	1.84017e-06	1	0.0200857	9.86684e-05
PDACT_KE332613.1_G000960	Transcription factor ICE1	0.023602	-0.888651	-0.610958	0.927389	0.000679748	0.0190342	1	0.0200857	0.092506
PDACT_KE332633.1_G002220	Aldose reductase	-0.472267	0.923389	1.07697	0.0819812	0.000683535	7.85204e-05	1	0.0201457	0.00174439
PDACT_KE332575.1_G001210	EKC/KEOPS complex subunit CGI121	0.415901	1.40383	1.47796	0.310352	0.000684841	0.000365699	1	0.0201457	0.0055372
PDACT_KE332874.1_G001140	myb domain protein 0 LENGTH=228	-0.0498405	1.39254	1.17606	0.901908	0.000684803	0.0039743	1	0.0201457	0.0315268
PDACT_KE332549.1_G004860	unknown protein; FUNCTIONS IN: molecular function unknown; INVOLVED IN: biological process unknown; LOCATED IN: chloroplast, plant-type cell wall; EXPRESSED IN: 22 plant structures; EXPRESSED DURING: 13 growth stages; Has 53 Blast hits to 53 proteins in 24 species: Archae - 0; Bacteria - 27; Metazoa - 0; Fungi - 0; Plants - 26; Viruses - 0; Other Eukaryotes - 0 (source: NCBI BLink). LENGTH=266	-0.001874	1.10664	1.31414	0.995364	0.000692663	6.0805e-05	1	0.0203027	0.00144097
PDACT_KE332564.1_G000740	Domain of unknown function (DUF23) LENGTH=496	-0.927259	1.95226	1.7588	0.101838	0.000692265	0.00211528	1	0.0203027	0.0202234
PDACT_KE333154.1_G000450	Interferon-related developmental regulator 1	0.326494	-0.936419	-0.956805	0.232908	0.000693887	0.000535637	1	0.0203142	0.0073696
PDACT_KE333393.1_G000320	zinc-finger protein 1 LENGTH=228	0.0791793	2.7389	2.38705	0.915788	0.000695432	0.00267345	1	0.0203352	0.0239444
PDACT_KE332574.1_G000950	BEST Arabidopsis thaliana protein match is: maternal effect embryo arrest 60 . LENGTH=204	-0.344661	1.45003	1.67215	0.421201	0.000697088	0.000102728	1	0.0203593	0.00213869
PDACT_KE332561.1_G003340	Patatin-like phospholipase domain-containing protein 4	0.00389642	-1.05713	-1.32217	0.989894	0.000698094	2.61411e-05	1	0.0203644	0.000761134
PDACT_KE332600.1_G001070	Cytochrome C1 family LENGTH=307	-0.228934	-1.10659	-1.50202	0.47672	0.000700027	5.90489e-06	1	0.0203909	0.000236042
PDACT_KE332638.1_G002120	BSD domain-containing protein LENGTH=432	0.164176	1.26622	1.23803	0.658875	0.000700668	0.000927865	1	0.0203909	0.0109785
PDACT_KE332608.1_G000850	Sec14p-like phosphatidylinositol transfer family protein LENGTH=314	0.179758	-1.17796	-1.40613	0.599278	0.00070161	5.9431e-05	1	0.0203941	0.00141388
PDACT_KE332590.1_G002900	26S protease regulatory subunit 6B homolog	0.0413751	-1.12315	-1.12557	0.899337	0.000707033	0.000702685	1	0.0205274	0.00895403
PDACT_KE332553.1_G001330	unknown protein; BEST Arabidopsis thaliana protein match is: unknown protein . LENGTH=207	0.03888	-1.03103	-0.922084	0.897113	0.000709965	0.00242647	1	0.0205882	0.0223903
PDACT_KE332559.1_G005270	aldose 1-epimerase family protein LENGTH=306	-0.387541	-1.78586	-1.54123	0.446838	0.000716211	0.00338889	1	0.0207447	0.028354
PDACT_KE332564.1_G000230	pumilio 5 LENGTH=961	0.128598	1.0014	1.46937	0.662456	0.000720103	8.94266e-07	1	0.0208083	5.57585e-05
PDACT_KE332810.1_G000260	Pentatricopeptide repeat-containing protein	0.0452208	-2.67493	-1.81515	0.951875	0.00071991	0.0190109	1	0.0208083	0.0924474
PDACT_KE332580.1_G000490	Ras-related protein Rab-1A	-0.0202254	1.0032	1.41874	0.945367	0.00072253	2.14159e-06	1	0.0208538	0.000109328
PDACT_KE332732.1_G001060	DNA mismatch repair protein MutS	-0.0753937	-0.96547	-1.3257	0.789532	0.000730515	4.51853e-06	1	0.0210595	0.000193232
PDACT_KE332707.1_G001490	3-dehydroquinate dehydratase n=2 Tax=Streptomyces RepID=UPI000363FAA4	-0.0274216	0.895704	0.596327	0.917243	0.000732731	0.024118	1	0.0210861	0.10816
PDACT_KE332692.1_G000700	kinesin 4 LENGTH=987	-1.88875	-3.15557	-1.83319	0.0355572	0.00073329	0.041674	1	0.0210861	0.154841
PDACT_KE332567.1_G001820	cytochrome P450, family 706, subfamily A, polypeptide 6 LENGTH=518	-1.37557	-2.43139	-1.33509	0.049695	0.000734021	0.0571684	1	0.0210861	0.191243
PDACT_KE332553.1_G005350	Argonaute family protein LENGTH=997	0.265602	-1.39546	-1.18903	0.511708	0.000736262	0.00390941	1	0.0211212	0.0311431
PDACT_KE332554.1_G002050	Heat stress transcription factor A-1	0.0279015	0.968628	0.960502	0.922431	0.000738075	0.000832362	1	0.0211283	0.0101222
PDACT_KE332710.1_G000400	Pre-mRNA-splicing factor cwc26	0.0815915	-0.850848	-0.950571	0.744211	0.000741286	0.000171056	1	0.0211747	0.00312803
PDACT_KE332553.1_G006050	Remorin family protein LENGTH=486	-0.072802	-2.17636	-0.873709	0.906144	0.000741424	0.160261	1	0.0211747	0.368631
PDACT_KE332565.1_G002770	UPI0003D24442 related cluster n=1 Tax=unknown RepID=UPI0003D24442	-0.0523589	-0.909988	-0.887335	0.844504	0.000744885	0.0010238	1	0.0212487	0.0117946
PDACT_KE332972.1_G000240	Terpenoid cyclases/Protein prenyltransferases superfamily protein LENGTH=785	-0.660815	1.55475	0.748597	0.147399	0.000749818	0.0995264	1	0.0213529	0.271884
PDACT_KE333889.1_G000120	U3 small nucleolar ribonucleoprotein protein imp3	0.0397761	1.2693	0.433012	0.915092	0.000750278	0.245762	1	0.0213529	0.476821
PDACT_KE332781.1_G000560	Phototropic-responsive NPH3 family protein LENGTH=617	0.161706	2.48515	3.63826	0.814889	0.000751364	2.75494e-06	1	0.021359	0.00013315
PDACT_KE332736.1_G000670	Protein kinase superfamily protein LENGTH=624	0.0654605	-1.04942	-1.36727	0.831667	0.000759164	1.35471e-05	1	0.0215182	0.000450419
PDACT_KE332814.1_G000750	time for coffee LENGTH=1555	-0.228291	-1.60555	-1.33262	0.623636	0.000759599	0.0048701	1	0.0215182	0.0362205
PDACT_KE332562.1_G002080	CASP-like protein	0.40097	-0.969781	-0.884166	0.158828	0.000760484	0.00214137	1	0.0215184	0.0204411
PDACT_KE333041.1_G000460	23S rRNA (guanosine-2'-O-)-methyltransferase RlmB	-0.191705	1.14942	1.12522	0.571691	0.000764561	0.000986075	1	0.0216088	0.0114897
PDACT_KE332610.1_G000820	Zinc finger protein CONSTANS-LIKE 14	0.0849047	-2.01875	-1.17062	0.883012	0.000768261	0.0455732	1	0.0216883	0.164662
PDACT_KE332675.1_G000860	unknown protein; BEST Arabidopsis thaliana protein match is: unknown protein . LENGTH=151	-0.16324	-0.91274	-0.871467	0.543802	0.000772599	0.00133194	1	0.0217857	0.0143784
PDACT_KE333161.1_G000150	unknown protein; BEST Arabidopsis thaliana protein match is: unknown protein . LENGTH=853	-2.22339	-4.25274	-3.3493	0.143823	0.000773536	0.0253037	1	0.0217871	0.111759
PDACT_KE332901.1_G000820	auxin response factor 9 LENGTH=638	0.436299	-2.17609	-2.8683	0.482195	0.000776072	1.64048e-05	1	0.0217984	0.00052823
PDACT_KE333525.1_G000240	unknown protein; BEST Arabidopsis thaliana protein match is: unknown protein . LENGTH=141	0.192436	-1.01433	-1.18309	0.518069	0.000775597	9.7598e-05	1	0.0217984	0.00206167
PDACT_KE332601.1_G000930	Kelch repeat-containing F-box family protein LENGTH=478	0.383762	-1.0777	-0.472343	0.225651	0.000776609	0.137057	1	0.0217984	0.333641
PDACT_KE332912.1_G000130	Cytokinin riboside 5'-monophosphate phosphoribohydrolase LOG	0.541402	-3.08621	-1.60796	0.654508	0.000778939	0.157929	1	0.0218388	0.365498
PDACT_KE333178.1_G000130	Isochorismate synthase, chloroplastic	-0.284645	-0.976953	-1.25954	0.322674	0.000783355	1.78581e-05	1	0.0219006	0.000563186
PDACT_KE332613.1_G000610	RING finger protein 10	0.116783	-0.858567	-0.663915	0.645106	0.000783822	0.00921999	1	0.0219006	0.0563689
PDACT_KE333612.1_G000120	high mobility group B1 LENGTH=185	0.318819	-1.02325	-0.853513	0.290927	0.0007859	0.00496612	1	0.0219336	0.0367754
PDACT_KE332545.1_G010960	P-loop containing nucleoside triphosphate hydrolases superfamily protein LENGTH=481	0.0368332	-1.06875	-1.88777	0.906759	0.000790786	7.16893e-09	1	0.0219699	1.28093e-06
PDACT_KE332546.1_G004710	Glutaredoxin family protein LENGTH=428	0.0462267	-1.76477	-2.22092	0.927476	0.000788396	3.89806e-05	1	0.0219699	0.00103151
PDACT_KE332819.1_G000150	CASP-like protein	0.111503	-1.66282	-1.85987	0.816886	0.000790768	0.000196718	1	0.0219699	0.00349302
PDACT_KE332570.1_G002330	Zinc finger FYVE domain-containing protein 16	0.0360422	-0.929158	-0.703926	0.895484	0.000790434	0.0107352	1	0.0219699	0.0625428
PDACT_KE332645.1_G000970	nitrate reductase 1 LENGTH=917	0.214291	-2.40258	-3.95507	0.752793	0.000792401	2.45101e-07	1	0.0219898	1.99773e-05
PDACT_KE333009.1_G000620	thylakoidal ascorbate peroxidase LENGTH=426	0	5.39906	1.10948	1	0.000794626	0.0736052	1	0.0220266	0.225674
PDACT_KE332577.1_G000270	sulfotransferase 16 LENGTH=338	-0.198391	-2.90327	-1.21714	0.805671	0.000797681	0.136499	1	0.0220863	0.332747
PDACT_KE332932.1_G000510	unknown protein; BEST Arabidopsis thaliana protein match is: unknown protein . LENGTH=340	-0.21174	-1.02119	-1.17125	0.482843	0.000807425	0.00012853	1	0.0223057	0.0025338
PDACT_KE333639.1_G000160	n=1 Tax=Arabidopsis thaliana RepID=Q8LAF5 ARATH	0.803242	1.79443	1.61072	0.130168	0.000809981	0.00264088	1	0.0223511	0.0237475
PDACT_KE332594.1_G001510	unknown protein; FUNCTIONS IN: molecular function unknown; INVOLVED IN: biological process unknown; LOCATED IN: chloroplast; EXPRESSED IN: 22 plant structures; EXPRESSED DURING: 13 growth stages; BEST Arabidopsis thaliana protein match is: unknown protein . LENGTH=162	0.178522	1.17974	1.51535	0.608177	0.000819114	2.01966e-05	1	0.02253	0.000622511
PDACT_KE332672.1_G001250	Plant invertase/pectin methylesterase inhibitor superfamily protein LENGTH=203	-0.139018	5.24712	2.70954	0.864508	0.000818347	0.0328174	1	0.02253	0.132701
PDACT_KE332552.1_G005120	3-ketoacyl-CoA synthase 1 LENGTH=528	0.623214	1.55765	0.54223	0.174202	0.000819221	0.237503	1	0.02253	0.467185
PDACT_KE332823.1_G000160	Protein LSD1	-0.0249855	-1.12413	-0.849822	0.939933	0.0008215	0.0110118	1	0.0225493	0.0634454
PDACT_KE332626.1_G002970	Tetratricopeptide repeat (TPR)-like superfamily protein LENGTH=492	0.0983731	-0.883655	-0.949455	0.707294	0.000826665	0.000335576	1	0.0226584	0.00518798
PDACT_KE332586.1_G000720	cytochrome P450, family 78, subfamily A, polypeptide 5 LENGTH=517	-0.356133	-2.56469	-3.87938	0.623359	0.000831479	1.83754e-06	1	0.0226742	9.86684e-05
PDACT_KE332622.1_G003000	FAR1-related sequence 5 LENGTH=788	-0.350081	-0.934924	-1.19732	0.206399	0.000829273	2.21144e-05	1	0.0226742	0.000664896
PDACT_KE332610.1_G000110	Histone-lysine N-methyltransferase, H3 lysine-9 specific SUVH4	-0.533094	-2.04564	-1.84319	0.363798	0.000831868	0.00254039	1	0.0226742	0.0230897
PDACT_KE332558.1_G000140	Tetraspanin-7	0	6.183	4.68056	1	0.000830662	0.00283493	1	0.0226742	0.0249254
PDACT_KE333108.1_G000550	gibberellin 3-oxidase 1 LENGTH=358	0	4.70551	2.00467	1	0.000829213	0.0189932	1	0.0226742	0.0923799
PDACT_KE332546.1_G003840	Glutathione S-transferase family protein LENGTH=227	-1.01627	-2.93925	-2.06912	0.220443	0.00083597	0.0155995	1	0.0227607	0.0806947
PDACT_KE332616.1_G002620	Mitochondrial substrate carrier family protein LENGTH=487	0.00771569	0.871442	0.881787	0.976394	0.000840346	0.000741	1	0.0228544	0.00929245
PDACT_KE332679.1_G001440	Phosphoinositide phosphatase family protein LENGTH=831	0.126213	1.06434	0.77183	0.691749	0.000843853	0.0153548	1	0.0229244	0.0798333
PDACT_KE332622.1_G001740	Prolyl 4-hydroxylase subunit alpha-1	1.11776	1.84323	1.77256	0.040338	0.000845121	0.0013229	1	0.0229334	0.0143372
PDACT_KE332754.1_G000640	purine permease 3 LENGTH=351	0.181814	-2.79438	-4.5658	0.816484	0.000846581	4.94001e-07	1	0.0229476	3.54986e-05
PDACT_KE332696.1_G001280	mitochondrial processing peptidase alpha subunit LENGTH=499	0.210389	1.00121	1.3802	0.480881	0.000849375	5.05681e-06	1	0.0229979	0.000209665
PDACT_KE332727.1_G000540	L-lactate dehydrogenase [cytochrome]	-0.0148644	-1.1037	-0.932719	0.963672	0.000852842	0.00470649	1	0.0230663	0.0353766
PDACT_KE332772.1_G000110	Cystathionine gamma-synthase, chloroplastic	-0.081352	-1.16409	-2.73265	0.813269	0.000857283	1.21353e-13	1	0.0231608	1.10134e-10
PDACT_KE333072.1_G000140	Phototropic-responsive NPH3 family protein LENGTH=746	-0.284989	1.44213	1.20232	0.502939	0.000861062	0.00521487	1	0.0232197	0.0380057
PDACT_KE332568.1_G000570	BEST Arabidopsis thaliana protein match is: nucleolar protein gar2-related . LENGTH=671	-0.255428	2.40775	1.17872	0.710969	0.000861359	0.0908509	1	0.0232197	0.257128
PDACT_KE332841.1_G000400	HNH endonuclease LENGTH=284	0.260414	0.947568	0.948856	0.35719	0.000863354	0.000855915	1	0.0232435	0.0103051
PDACT_KE332956.1_G000290	ferredoxin 1 LENGTH=148	-0.402796	-0.958366	-0.921902	0.158283	0.000864137	0.00134431	1	0.0232435	0.0144415
PDACT_KE332642.1_G001690	Protein with potential galactosyl transferase activity n=1 Tax=Chlamydomonas reinhardtii RepID=A8HQK9 CHLRE	0.113307	-1.22336	-0.770962	0.75416	0.000865804	0.0342219	1	0.0232628	0.136376
PDACT_KE332595.1_G000210	unknown protein; BEST Arabidopsis thaliana protein match is: unknown protein . LENGTH=319	0.62877	-1.65053	-0.964641	0.187449	0.000866763	0.0473141	1	0.0232631	0.168884
PDACT_KE332852.1_G000980	Protein phosphatase 2C family protein LENGTH=493	0.238103	-1.06993	-1.64778	0.453573	0.000874449	4.57464e-07	1	0.0234437	3.32632e-05
PDACT_KE332700.1_G000740	unknown protein; Has 30201 Blast hits to 17322 proteins in 780 species: Archae - 12; Bacteria - 1396; Metazoa - 17338; Fungi - 3422; Plants - 5037; Viruses - 0; Other Eukaryotes - 2996 (source: NCBI BLink). LENGTH=294	-0.292779	0.878886	0.689094	0.266672	0.000876554	0.00896666	1	0.0234643	0.0553309
PDACT_KE332555.1_G004060	cyclic nucleotide-gated channel 14 LENGTH=726	-0.947073	-2.3363	-1.44073	0.161927	0.000877134	0.0359074	1	0.0234643	0.140403
PDACT_KE333579.1_G000370	Histone-lysine N-methyltransferase E(z)	0.158303	-2.1936	-2.33021	0.801725	0.000881846	0.000544441	1	0.0235646	0.00746975
PDACT_KE333126.1_G000600	callose synthase 5 LENGTH=1923	-0.0193849	-0.990054	-1.15392	0.947524	0.00088738	0.000114662	1	0.0236609	0.00233556
PDACT_KE332973.1_G000650	Bifunctional inhibitor/lipid-transfer protein/seed storage 2S albumin superfamily protein LENGTH=96	0.333566	5.64045	3.04751	0.289512	0.000889504	0.00947045	1	0.0236918	0.0575412
PDACT_KE332647.1_G000860	ubiquitin conjugating enzyme 9 LENGTH=178	0.382821	1.04528	0.922187	0.220945	0.00089296	0.00334703	1	0.023733	0.0280779
PDACT_KE332549.1_G004040	myb domain protein 7 LENGTH=269	0.586541	3.72076	2.61565	0.500113	0.000892989	0.011685	1	0.023733	0.065929
PDACT_KE332631.1_G001810	unknown protein; BEST Arabidopsis thaliana protein match is: unknown protein . LENGTH=540	0.464876	2.02312	1.52848	0.430593	0.000894379	0.0109211	1	0.0237442	0.0631457
PDACT_KE332990.1_G000570	DNA primase, large subunit family LENGTH=490	0.17074	-2.51635	-4.2591	0.812882	0.000900583	2.20935e-07	1	0.0238572	1.84143e-05
PDACT_KE332558.1_G000320	UDP-D-glucuronate 4-epimerase 1 LENGTH=429	0.451148	2.67003	1.33879	0.549368	0.000899883	0.081362	1	0.0238572	0.240349
PDACT_KE334705.1_G000110	HXXXD-type acyl-transferase family protein LENGTH=428	-0.407771	-2.10831	-2.04303	0.50338	0.000903805	0.0014153	1	0.0238686	0.0150053
PDACT_KE334162.1_G000160	chaperone protein dnaJ-related LENGTH=315	0.0151386	1.10771	0.925931	0.963415	0.000903938	0.00537738	1	0.0238686	0.0388465
PDACT_KE333173.1_G000330	ubiquitin-conjugating enzyme 32 LENGTH=309	-0.303524	-1.10545	-0.823756	0.355255	0.000903814	0.0130111	1	0.0238686	0.0710187
PDACT_KE332624.1_G002320	Late embryogenesis abundant protein LENGTH=151	2.08323	-2.79297	-3.08617	0.034715	0.000909979	0.000135363	1	0.0240023	0.00262624
PDACT_KE332552.1_G000400	Ribonuclease P protein subunit P38-related LENGTH=720	-0.300902	-1.14561	-0.72364	0.377265	0.000912396	0.0347304	1	0.0240402	0.137507
PDACT_KE332573.1_G001540	Poor homologous synapsis 1 protein n=4 Tax=Zea mays RepID=Q6W2J0 MAIZE	-0.533152	-1.36117	-1.97903	0.186355	0.000916967	2.42773e-06	1	0.0240632	0.000121406
PDACT_KE332548.1_G004630	Peroxidase superfamily protein LENGTH=327	-0.523218	1.94871	2.76749	0.368685	0.0009159	4.74884e-06	1	0.0240632	0.000199773
PDACT_KE332550.1_G003590	Adenosylmethionine-8-amino-7-oxononanoate aminotransferase	-0.0282589	-1.06896	-1.4243	0.929204	0.000917199	1.26492e-05	1	0.0240632	0.000427527
PDACT_KE332578.1_G003580	G-box binding factor 1 LENGTH=315	0.140557	1.18264	1.24932	0.69246	0.000916711	0.000477269	1	0.0240632	0.0067174
PDACT_KE333830.1_G000240	Ribonuclease 3	-0.0265517	1.05797	1.07397	0.933052	0.000918364	0.000770583	1	0.024068	0.00956554
PDACT_KE332565.1_G000830	unknown protein; FUNCTIONS IN: molecular function unknown; INVOLVED IN: biological process unknown; LOCATED IN: chloroplast thylakoid membrane; EXPRESSED IN: 20 plant structures; EXPRESSED DURING: 13 growth stages;	-0.367187	0.983093	0.974568	0.213178	0.000920734	0.00102143	1	0.0240786	0.0117785
PDACT_KE333812.1_G000110	unknown protein; FUNCTIONS IN: molecular function unknown; INVOLVED IN: biological process unknown; LOCATED IN: chloroplast; EXPRESSED IN: 24 plant structures; EXPRESSED DURING: 15 growth stages;	-0.167878	0.929229	0.7085	0.547764	0.000920332	0.0113371	1	0.0240786	0.0645233
PDACT_KE332558.1_G003210	Filament-like plant protein	-0.0424882	1.37849	2.29016	0.918022	0.000934259	8.45129e-08	1	0.0242743	8.6364e-06
PDACT_KE332595.1_G000500	adenylate kinase family protein LENGTH=588	-0.227237	-1.06777	-1.13166	0.476377	0.000933472	0.000462099	1	0.0242743	0.00654643
PDACT_KE332808.1_G000980	Membrane fusion protein Use1 LENGTH=236	-0.0332438	1.16439	1.10738	0.924084	0.000929322	0.00163317	1	0.0242743	0.0166539
PDACT_KE332583.1_G000160	structural maintenance of chromosomes 6A LENGTH=1058	-0.461949	-1.61461	-1.36302	0.330901	0.000934321	0.00503322	1	0.0242743	0.0371152
PDACT_KE332551.1_G000720	Pentatricopeptide repeat-containing protein	-0.0355671	1.32465	0.915998	0.928473	0.000930214	0.0212618	1	0.0242743	0.0998273
PDACT_KE332596.1_G002020	Leucine-rich repeat-containing protein 48	-0.0228468	-0.93263	-1.24077	0.934842	0.000939603	1.23353e-05	1	0.0243618	0.000420396
PDACT_KE332926.1_G001010	2-nitropropane dioxygenase-like protein n=6 Tax=Brassicaceae RepID=Q9FMG0 ARATH	0.118661	-1.72283	-1.49006	0.814168	0.000940511	0.00400114	1	0.0243618	0.0316679
PDACT_KE332593.1_G000590	acyl carrier protein 1 LENGTH=137	0.351638	0.99972	0.413137	0.242152	0.000949833	0.169639	1	0.0245773	0.380977
PDACT_KE332749.1_G000630	unknown protein; FUNCTIONS IN: molecular function unknown; INVOLVED IN: biological process unknown; LOCATED IN: chloroplast thylakoid membrane; EXPRESSED IN: 23 plant structures; EXPRESSED DURING: 13 growth stages; Has 121 Blast hits to 121 proteins in 17 species: Archae - 0; Bacteria - 0; Metazoa - 0; Fungi - 0; Plants - 121; Viruses - 0; Other Eukaryotes - 0 (source: NCBI BLink). LENGTH=129	-0.00284785	-1.20595	-1.52685	0.993683	0.000955519	3.37808e-05	1	0.0246983	0.000916682
PDACT_KE332564.1_G002450	SWIB/MDM2 domain superfamily protein LENGTH=141	0.339575	-0.924686	-0.959076	0.220516	0.000958293	0.00063255	1	0.0247439	0.0083603
PDACT_KE332548.1_G004480	Protein transport protein Sec61 subunit beta	-0.0151695	-1.02356	-1.18925	0.960489	0.000962594	0.000136932	1	0.0248288	0.00265038
PDACT_KE332566.1_G004330	Glucan endo-1,3-beta-glucosidase 7	0.654187	1.25059	2.62039	0.0812179	0.000965987	3.66358e-11	1	0.0248902	1.57495e-08
PDACT_KE332577.1_G001700	SKP1-interacting partner 15	-0.405602	-1.56711	-1.00028	0.381641	0.000967718	0.0329766	1	0.0249086	0.133014
PDACT_KE332998.1_G000170	Leucine-rich receptor-like protein kinase family protein LENGTH=1101	-0.0649516	1.75932	0.830675	0.901273	0.000972091	0.112901	1	0.0249949	0.29561
PDACT_KE332841.1_G000440	HNH endonuclease LENGTH=284	0.234295	1.0151	1.12184	0.444247	0.000974742	0.000278046	1	0.0250368	0.0045356
PDACT_KE332840.1_G000910	Protein kinase superfamily protein LENGTH=438	-0.88436	-2.53712	0.229991	0.243426	0.000976179	0.76155	1	0.0250474	0.880818
PDACT_KE332554.1_G004200	THO complex subunit 4	0.419166	1.29471	1.64243	0.279114	0.00097853	3.42586e-05	1	0.0250553	0.000925549
PDACT_KE332872.1_G000340	oligopeptide transporter 7 LENGTH=766	-0.643297	-1.76613	-3.72138	0.218109	0.000981533	1.63658e-10	1	0.0250798	5.73346e-08
PDACT_KE333009.1_G000540	Succinate-semialdehyde dehydrogenase, mitochondrial	0.183372	-0.939228	-0.359331	0.515637	0.000980659	0.203782	1	0.0250798	0.425992
PDACT_KE332573.1_G001560	Protein kinase superfamily protein LENGTH=690	-0.0237399	-0.956924	-0.47034	0.934217	0.000985818	0.103037	1	0.025163	0.278095
PDACT_KE332546.1_G008310	UDP-Glycosyltransferase superfamily protein LENGTH=456	0.7056	1.50929	0.716353	0.117663	0.000987822	0.112267	1	0.0251879	0.294627
PDACT_KE332797.1_G000930	serine hydroxymethyltransferase 4 LENGTH=471	-0.146582	-0.997327	-1.97175	0.624971	0.000992583	2.43081e-10	1	0.0252813	8.15953e-08
PDACT_KE332633.1_G002210	ABC transporter A family member 7	-0.169806	-1.07952	-1.2234	0.600423	0.000993546	0.000200529	1	0.0252813	0.00354273
PDACT_KE332591.1_G001550	Ankyrin repeat family protein LENGTH=662	0.173729	-0.885463	-1.15842	0.515059	0.000997163	1.86736e-05	1	0.025347	0.000582901
PDACT_KE332548.1_G007580	myb domain protein 48 LENGTH=256	1.26694	3.01154	3.90616	0.139652	0.00100449	4.32319e-05	1	0.0255068	0.00111596
PDACT_KE333192.1_G000580	UDP-Glycosyltransferase superfamily protein LENGTH=496	1.65967	-3.33691	-3.17206	0.156358	0.00100618	0.00242035	1	0.0255231	0.022372
PDACT_KE332622.1_G001220	EG45-like domain containing protein	0	4.29189	2.54852	1	0.00101378	0.00848214	1	0.0256629	0.0532121
PDACT_KE332595.1_G000510	Adenylate kinase 2, chloroplastic	-0.438953	-1.32041	-1.60019	0.266924	0.0010184	8.11987e-05	1	0.0257532	0.00178929
PDACT_KE332601.1_G001380	aldose 1-epimerase family protein LENGTH=306	0.157603	-1.05469	-1.04362	0.619808	0.00102325	0.00115468	1	0.0258492	0.0128962
PDACT_KE332659.1_G001000	ADP,ATP carrier protein, mitochondrial	0.155832	-0.939075	-2.17601	0.582091	0.00102519	2.60852e-13	1	0.0258625	2.28282e-10
PDACT_KE332609.1_G002960	D-amino acid dehydrogenase small subunit	0.00105661	-1.16866	-1.10176	0.997596	0.00102589	0.00194247	1	0.0258625	0.0189786
PDACT_KE333196.1_G000380	Solute carrier family 2, facilitated glucose transporter member 3	-0.231812	-1.11875	-1.38552	0.490925	0.00103131	5.53054e-05	1	0.0259468	0.00133957
PDACT_KE332628.1_G002210	CTC-interacting domain 7 LENGTH=567	0.155467	-0.87508	-0.80618	0.555734	0.00103192	0.00250941	1	0.0259468	0.0228826
PDACT_KE333017.1_G000670	Phenylalanine--tRNA ligase alpha subunit	0.419716	0.922801	0.760518	0.134513	0.00103241	0.00681567	1	0.0259468	0.0457958
PDACT_KE332738.1_G001100	FUNCTIONS IN: molecular function unknown; INVOLVED IN: biological process unknown; EXPRESSED IN: 23 plant structures; EXPRESSED DURING: 13 growth stages;	0.589361	1.25941	1.80178	0.120761	0.00103478	3.72379e-06	1	0.0259797	0.000165263
PDACT_KE332670.1_G001900	Sphingosine-1-phosphate phosphatase n=2 Tax=Papilionoideae RepID=G8A197 MEDTR	-0.032981	-1.27612	-1.61442	0.931192	0.00103909	4.19747e-05	1	0.0260613	0.0010904
PDACT_KE332625.1_G002340	NAC domain containing protein 102 LENGTH=312	1.01993	2.29532	1.68394	0.131085	0.00104668	0.0141519	1	0.0261851	0.0755044
PDACT_KE332658.1_G001520	DNA glycosylase superfamily protein LENGTH=329	0.162295	-3.17021	-0.786736	0.880256	0.00104723	0.456577	1	0.0261851	0.676582
PDACT_KE332641.1_G001490	signal recognition particle receptor alpha subunit family protein LENGTH=634	0.1095	-1.16711	-1.49718	0.754579	0.00104961	3.33727e-05	1	0.0262178	0.000908626
PDACT_KE332574.1_G001170	Tetratricopeptide repeat (TPR)-like superfamily protein LENGTH=274	0.176865	-1.42467	-2.38732	0.678287	0.00105378	1.07834e-07	1	0.0262952	1.04557e-05
PDACT_KE333004.1_G000190	Lipid A export ATP-binding/permease protein MsbA	0.320351	1.21127	0.400747	0.382786	0.00105509	0.275052	1	0.0263011	0.507788
PDACT_KE332718.1_G000340	Zinc finger protein CONSTANS-LIKE 13	-0.140469	-0.878502	-0.689632	0.597898	0.00106586	0.00999943	1	0.0265425	0.0596751
PDACT_KE332603.1_G000750	Heparan-alpha-glucosaminide N-acetyltransferase	0.237861	1.93227	2.96783	0.678358	0.0010684	1.34849e-06	1	0.0265788	7.77494e-05
PDACT_KE332635.1_G000860	plastid developmental protein DAG, putative LENGTH=232	-0.222745	1.20895	1.33881	0.541516	0.001074	0.000305627	1	0.0266909	0.00485674
PDACT_KE332551.1_G003560	Protein of unknown function (DUF2296) LENGTH=443	-0.338841	1.88143	2.86333	0.554612	0.00108055	1.46752e-06	1	0.0268265	8.22884e-05
PDACT_KE332567.1_G001130	IAA-amino acid hydrolase ILR1-like 5	-0.211417	-1.13714	-1.72957	0.538102	0.00108422	1.05169e-06	1	0.0268903	6.39468e-05
PDACT_KE332944.1_G000220	BTB/POZ domain-containing protein LENGTH=499	-0.636515	-2.667	-1.03158	0.413215	0.00109008	0.18839	1	0.0270083	0.405523
PDACT_KE333460.1_G000210	aldehyde oxidase 1 LENGTH=1368	-0.0509254	-1.97112	-1.06252	0.93013	0.00109306	0.0714949	1	0.0270548	0.221508
PDACT_KE332850.1_G000580	Sigma factor SigB regulation protein RsbQ	0.1433	1.14189	1.2499	0.678694	0.00109849	0.000365545	1	0.0271618	0.0055372
PDACT_KE332725.1_G001580	sphingosine kinase 1 LENGTH=485	0.00382992	-1.21051	-0.874197	0.991605	0.0011012	0.0176975	1	0.0272014	0.0879509
PDACT_KE332921.1_G000200	5'-AMP-activated protein kinase-related LENGTH=532	0.269739	1.49008	2.0547	0.551601	0.00110775	9.41167e-06	1	0.0273356	0.000342172
PDACT_KE332726.1_G001330	unknown protein; FUNCTIONS IN: molecular function unknown; INVOLVED IN: biological process unknown; LOCATED IN: chloroplast thylakoid membrane, chloroplast, chloroplast envelope; EXPRESSED IN: 24 plant structures; EXPRESSED DURING: 13 growth stages; Has 30201 Blast hits to 17322 proteins in 780 species: Archae - 12; Bacteria - 1396; Metazoa - 17338; Fungi - 3422; Plants - 5037; Viruses - 0; Other…	-0.202185	0.980168	0.473014	0.498361	0.00111089	0.113419	1	0.0273855	0.296419
PDACT_KE332603.1_G001630	Tetratricopeptide repeat (TPR)-like superfamily protein LENGTH=475	0.0762017	-0.92815	-0.722103	0.786681	0.00111676	0.0109815	1	0.0275027	0.0633647
PDACT_KE332661.1_G000130	Octicosapeptide/Phox/Bem1p (PB1) domain-containing protein / tetratricopeptide repeat (TPR)-containing protein LENGTH=745	-0.361081	-0.923719	-1.055	0.199288	0.00112431	0.000209784	1	0.0276393	0.00366658
PDACT_KE332655.1_G001940	RING/U-box superfamily protein LENGTH=248	0.325161	1.16913	0.852447	0.361668	0.00112457	0.0172038	1	0.0276393	0.0862618
PDACT_KE336448.1_G000100	laccase 16 LENGTH=523	-1.05631	-3.44885	-2.1326	0.430454	0.00112749	0.103082	1	0.0276833	0.278186
PDACT_KE332789.1_G001070	Chaperone protein DnaJ	0.789866	1.22358	1.45807	0.0341895	0.00113846	0.000115802	1	0.0279246	0.00235291
PDACT_KE332563.1_G004430	Dedicator of cytokinesis protein 11	-0.196405	-1.01933	-0.892976	0.526434	0.00113962	0.00428864	1	0.0279252	0.0332455
PDACT_KE332801.1_G000640	expansin B2 LENGTH=273	-0.0591163	3.9815	-1.13272	0.954513	0.00114831	0.263841	1	0.028082	0.496098
PDACT_KE332560.1_G003450	non-specific phospholipase C2 LENGTH=514	0.805346	2.11589	1.51927	0.200853	0.00116217	0.0174872	1	0.0283926	0.0872546
PDACT_KE332700.1_G000810	Sugar phosphate exchanger 2	0.393319	-2.14464	-0.980465	0.533525	0.00116695	0.127311	1	0.0284811	0.318362
PDACT_KE337329.1_G000100	receptor-like kinase LENGTH=751	0.13113	0.873818	0.870184	0.624449	0.0011694	0.00123255	1	0.0285125	0.0135803
PDACT_KE332635.1_G001170	Adenine nucleotide alpha hydrolases-like superfamily protein LENGTH=242	0.149045	-0.89099	-1.21896	0.5835	0.00117268	1.07825e-05	1	0.0285639	0.000384033
PDACT_KE333217.1_G000600	Protein of unknown function (DUF1639) LENGTH=205	0.124622	0.908389	1.25697	0.653983	0.00117462	8.25211e-06	1	0.0285829	0.000312534
PDACT_KE332551.1_G005430	FKBP-like peptidyl-prolyl cis-trans isomerase family protein LENGTH=232	-0.164401	-1.05003	-1.2753	0.607553	0.0011825	8.95211e-05	1	0.0287015	0.00192399
PDACT_KE333056.1_G000250	Haloacid dehalogenase-like hydrolase (HAD) superfamily protein LENGTH=465	0.320611	1.57057	0.41759	0.503337	0.00118301	0.384728	1	0.0287015	0.614881
PDACT_KE332595.1_G001150	Adenylate cyclase n=4 Tax=Andropogoneae RepID=B6TQK5 MAIZE	-0.216851	-1.34275	-1.16564	0.594059	0.001187	0.00472393	1	0.0287697	0.0353993
PDACT_KE332565.1_G002870	Histidine kinase-, DNA gyrase B-, and HSP90-like ATPase family protein LENGTH=2729	-0.602059	-2.17901	-1.84166	0.351493	0.00119447	0.00581876	1	0.0289222	0.0410932
PDACT_KE332676.1_G001220	transferases, transferring glycosyl groups LENGTH=206	0.436125	0.914937	1.3064	0.120593	0.00120192	4.49742e-06	1	0.029074	0.000192666
PDACT_KE332611.1_G001870	Major pollen allergen Bet v 1-D/H	0.225314	-3.24031	-2.88525	0.838182	0.0012058	0.00611601	1	0.0291391	0.0424552
PDACT_KE332556.1_G000980	Receptor expression-enhancing protein 6	0.518834	2.34833	1.54538	0.452544	0.00121078	0.0289947	1	0.0292017	0.122476
PDACT_KE333229.1_G000500	Phosphoribulokinase / Uridine kinase family LENGTH=674	1.58384	-2.58527	-0.937443	0.0545432	0.00121399	0.242538	1	0.0292505	0.473068
PDACT_KE332579.1_G001130	Ras-related protein Rab-6A	0.325287	-1.2743	-1.41239	0.399573	0.00121649	0.000373803	1	0.0292531	0.00561599
PDACT_KE332720.1_G000530	Urea active transporter	-0.0475948	1.51721	1.50777	0.917863	0.00121569	0.00130877	1	0.0292531	0.0142518
PDACT_KE333029.1_G000300	violaxanthin de-epoxidase-related LENGTH=522	-0.38762	-0.982476	-1.33356	0.198366	0.00122339	1.3401e-05	1	0.0293902	0.000447991
PDACT_KE332579.1_G001120	Ras-related protein Rab-6.1	0.42019	-1.12166	-1.3824	0.216863	0.00123104	8.61591e-05	1	0.0295451	0.00187499
PDACT_KE332944.1_G000660	histone deacetylase 14 LENGTH=423	0.177423	0.916312	1.26867	0.528932	0.00123852	8.99546e-06	1	0.0296664	0.000333503
PDACT_KE332603.1_G000740	E3 ubiquitin-protein ligase BAH1	0.139936	1.04462	0.594326	0.662802	0.00124633	0.0648029	1	0.0298244	0.20695
PDACT_KE332548.1_G005990	purple acid phosphatase 27 LENGTH=611	0.190318	1.52702	1.2642	0.683909	0.00125363	0.00730957	1	0.0299698	0.0479683
PDACT_KE332567.1_G001320	unknown protein; FUNCTIONS IN: molecular function unknown; INVOLVED IN: biological process unknown;	-0.111927	-0.900074	-1.46521	0.685413	0.00126275	2.51383e-07	1	0.0300815	2.01964e-05
PDACT_KE332550.1_G002930	endonuclease III 2 LENGTH=386	-0.202737	-1.01325	-1.6153	0.514572	0.0012653	4.28194e-07	1	0.0300815	3.16993e-05
PDACT_KE332567.1_G002400	Phosphatidylinositol N-acetyglucosaminlytransferase subunit P-related LENGTH=464	0.86862	1.81087	2.1673	0.117787	0.00126166	0.000133608	1	0.0300815	0.0026087
PDACT_KE334401.1_G000130	Hypoxia-responsive family protein LENGTH=96	-0.535	-3.20753	-3.29465	0.605868	0.00126477	0.00101032	1	0.0300815	0.011711
PDACT_KE332572.1_G000270	Hypoxia-responsive family protein LENGTH=96	-0.535001	-3.20753	-3.29464	0.605933	0.0012669	0.00101207	1	0.0300815	0.0117257
PDACT_KE333523.1_G000380	Ribosome-inactivating protein n=1 Tax=Beauveria bassiana (strain ARSEF 2860) RepID=J5JPL8 BEAB2	1.96903	5.81026	4.87395	0.181845	0.0012665	0.00454245	1	0.0300815	0.0345141
PDACT_KE332624.1_G002580	allene oxide cyclase 4 LENGTH=254	-0.258161	1.66502	1.23944	0.608324	0.00125984	0.0152079	1	0.0300815	0.0793417
PDACT_KE332667.1_G001840	Ankyrin repeat domain-containing protein 13C-B	-0.309536	-1.32897	-0.748456	0.444169	0.00126887	0.0662687	1	0.0300991	0.210399
PDACT_KE332567.1_G000880	auxin response factor 15 LENGTH=598	-0.0368828	2.56929	1.83518	0.961801	0.00127534	0.018232	1	0.0302233	0.0897103
PDACT_KE332858.1_G000410	Fe superoxide dismutase 2 LENGTH=305	0.176763	1.03063	0.992948	0.577266	0.00128166	0.00190996	1	0.0303146	0.0187432
PDACT_KE332571.1_G002850	RING/FYVE/PHD zinc finger superfamily protein LENGTH=231	0.103896	-1.16006	-1.44717	0.769387	0.00128529	7.14707e-05	1	0.0303357	0.00163065
PDACT_KE332568.1_G003110	Cytochrome P450 superfamily protein LENGTH=520	0.0479516	-3.31913	-3.31913	0.971847	0.00128627	0.00173183	1	0.0303357	0.017385
PDACT_KE332579.1_G003650	unknown protein; FUNCTIONS IN: molecular function unknown; INVOLVED IN: biological process unknown; LOCATED IN: plasma membrane; EXPRESSED IN: 21 plant structures; EXPRESSED DURING: 11 growth stages; BEST Arabidopsis thaliana protein match is: unknown protein . LENGTH=200	0.384735	1.41946	1.71761	0.376773	0.00130109	0.000113343	1	0.0306557	0.00231699
PDACT_KE332575.1_G002810	Protein of unknown function (DUF620) LENGTH=439	-0.362183	-1.92478	-1.53997	0.52946	0.00130256	0.00946894	1	0.0306609	0.0575412
PDACT_KE332560.1_G001120	RmlC-like cupins superfamily protein LENGTH=134	0.103799	1.23224	1.13948	0.78351	0.00130529	0.00289277	1	0.0306859	0.0252978
PDACT_KE333420.1_G000180	phospholipase D P1 LENGTH=1096	-0.40172	-1.22132	-0.812441	0.283162	0.00130613	0.0311211	1	0.0306859	0.128016
PDACT_KE332588.1_G001920	GCK domain-containing protein LENGTH=179	0.532038	1.61443	1.13112	0.281501	0.00131172	0.0230005	1	0.0307877	0.104771
PDACT_KE332750.1_G001560	F-box family protein LENGTH=442	0.0661529	-0.962541	-0.812323	0.823484	0.00131835	0.00661535	1	0.0308699	0.044755
PDACT_KE333162.1_G000450	unknown protein; Has 51 Blast hits to 51 proteins in 13 species: Archae - 0; Bacteria - 0; Metazoa - 0; Fungi - 0; Plants - 51; Viruses - 0; Other Eukaryotes - 0 (source: NCBI BLink). LENGTH=141	0.802072	3.54251	1.4784	0.0953767	0.00131811	0.0273746	1	0.0308699	0.11791
PDACT_KE332597.1_G001610	Elongation factor 1-alpha	-0.208092	1.22214	-0.339734	0.580501	0.001319	0.367591	1	0.0308699	0.599777
PDACT_KE332627.1_G001140	zinc-finger protein 3 LENGTH=193	0.572417	1.68952	2.01242	0.267514	0.00132348	0.000153174	1	0.0309453	0.00290022
PDACT_KE332548.1_G005530	Protein of unknown function, DUF538 LENGTH=179	0.202703	2.02208	1.03503	0.739289	0.00132563	0.092412	1	0.0309659	0.259924
PDACT_KE332575.1_G003810	BTB/POZ domain-containing protein LENGTH=855	0.087656	0.851724	1.03806	0.739937	0.00133035	9.69389e-05	1	0.0310465	0.00204952
PDACT_KE332548.1_G008010	glycine-rich RNA-binding protein 2 LENGTH=158	-0.0907653	1.73623	2.25809	0.864774	0.00133609	4.10531e-05	1	0.0311508	0.00107246
PDACT_KE332547.1_G007380	Photosystem II 5 kDa protein, chloroplastic	0.0386886	1.39168	1.13546	0.927629	0.00134058	0.00847487	1	0.0312258	0.0531801
PDACT_KE332704.1_G001480	unknown protein; FUNCTIONS IN: molecular function unknown; INVOLVED IN: biological process unknown; LOCATED IN: chloroplast; EXPRESSED IN: 23 plant structures; EXPRESSED DURING: 14 growth stages; BEST Arabidopsis thaliana protein match is: unknown protein . LENGTH=140	0.202452	1.09201	0.775432	0.548672	0.00134486	0.0221744	1	0.0312958	0.102463
PDACT_KE332547.1_G003150	UDP-Glycosyltransferase superfamily protein LENGTH=460	-0.127591	-2.34247	-2.78254	0.854458	0.00134761	0.000202598	1	0.0313004	0.00356526
PDACT_KE332570.1_G001320	EFR3-like protein n=1 Tax=Medicago truncatula RepID=G7JTI7 MEDTR	0.348071	-1.04443	-0.674345	0.277829	0.00134674	0.0373015	1	0.0313004	0.143943
PDACT_KE332735.1_G001060	2-oxoglutarate (2OG) and Fe(II)-dependent oxygenase superfamily protein LENGTH=394	-0.305485	0.96237	0.814042	0.306452	0.00135702	0.00662828	1	0.031489	0.0448054
PDACT_KE332801.1_G001040	DERLIN-1 LENGTH=266	-2.08033	-3.74269	-4.60296	0.0689611	0.00136194	7.4162e-05	1	0.0315732	0.00167644
PDACT_KE332906.1_G000270	Major pollen allergen Bet v 1-D/H	-1.3768	-3.13463	-5.19418	0.134142	0.00136908	1.46583e-06	1	0.0317087	8.22884e-05
PDACT_KE332667.1_G001820	Protein kinase superfamily protein LENGTH=793	-0.0906808	-1.13562	-1.804	0.795786	0.00137295	5.99844e-07	1	0.0317384	4.10575e-05
PDACT_KE332578.1_G000500	cyclic nucleotide-gated channel 14 LENGTH=726	-0.157695	-1.16456	-0.842415	0.660561	0.00137265	0.0198568	1	0.0317384	0.0950223
PDACT_KE333224.1_G000540	early nodulin-like protein 17 LENGTH=172	-0.14856	-2.77409	-4.30274	0.859595	0.00137473	4.96243e-07	1	0.0317496	3.55554e-05
PDACT_KE333978.1_G000190	Maternal effect uncoordination 2-1 protein n=1 Tax=Dimocarpus longan RepID=M1SX84 9ROSI	-0.182151	-1.41568	-0.721044	0.674719	0.00137915	0.0983378	1	0.0318218	0.2699
PDACT_KE332920.1_G000830	unknown protein; Has 30201 Blast hits to 17322 proteins in 780 species: Archae - 12; Bacteria - 1396; Metazoa - 17338; Fungi - 3422; Plants - 5037; Viruses - 0; Other Eukaryotes - 2996 (source: NCBI BLink). LENGTH=235	1.07123	2.43807	1.42547	0.142513	0.00138107	0.0535541	1	0.031836	0.183076
PDACT_KE332568.1_G003840	4-methyl-5(B-hydroxyethyl)-thiazole monophosphate biosynthesis protein n=16 Tax=Ectothiorhodospiraceae RepID=UPI00035C3274	0.433821	1.05984	0.838866	0.186844	0.00138436	0.011075	1	0.031882	0.0636185
PDACT_KE333001.1_G000390	unknown protein; FUNCTIONS IN: molecular function unknown; INVOLVED IN: biological process unknown; LOCATED IN: cellular component unknown; EXPRESSED IN: 25 plant structures; EXPRESSED DURING: 13 growth stages; BEST Arabidopsis thaliana protein match is: unknown protein . LENGTH=687	0.390829	0.864166	1.0483	0.147579	0.00139298	0.000111699	1	0.0320477	0.00229235
PDACT_KE332558.1_G000810	Protein kinase superfamily protein LENGTH=412	0.200147	-0.779506	-0.317083	0.408212	0.0013975	0.191353	1	0.032064	0.40937
PDACT_KE332912.1_G000480	tRNA (Adenine-N(1)-)-methyltransferase non-catalytic subunit trm6 n=1 Tax=Aegilops tauschii RepID=M8AY28 AEGTA	0.653261	2.3655	2.87638	0.354937	0.00140504	0.000143921	1	0.0320823	0.00274874
PDACT_KE332559.1_G000260	unknown protein; FUNCTIONS IN: molecular function unknown; INVOLVED IN: N-terminal protein myristoylation; LOCATED IN: cellular component unknown; EXPRESSED IN: 24 plant structures; EXPRESSED DURING: 14 growth stages; BEST Arabidopsis thaliana protein match is: unknown protein . LENGTH=210	0.725269	2.77546	2.58081	0.372957	0.00140783	0.00275733	1	0.0320823	0.0244797
PDACT_KE332615.1_G002200	nuclear transport factor 2B LENGTH=134	0.668077	1.32936	1.23167	0.104867	0.00140267	0.00303474	1	0.0320823	0.0262121
PDACT_KE332552.1_G004560	FACT complex subunit SSRP1	-0.17626	4.22079	3.47319	0.843114	0.0014081	0.00547248	1	0.0320823	0.0393426
PDACT_KE332874.1_G000600	endoribonuclease L-PSP family protein LENGTH=187	0.000642442	1.00734	0.653324	0.99836	0.00140208	0.0372702	1	0.0320823	0.143845
PDACT_KE332891.1_G000770	RING-H2 finger protein 2B LENGTH=147	-0.558327	2.11896	1.33297	0.389822	0.00140485	0.0408583	1	0.0320823	0.152677
PDACT_KE332568.1_G001880	unknown protein; FUNCTIONS IN: molecular function unknown; INVOLVED IN: biological process unknown; LOCATED IN: mitochondrion; EXPRESSED IN: petal, leaf whorl, flower; EXPRESSED DURING: 4 anthesis, petal differentiation and expansion stage; Has 1807 Blast hits to 1807 proteins in 277 species: Archae - 0; Bacteria - 0; Metazoa - 736; Fungi - 347; Plants - 385; Viruses - 0; Other Eukaryotes - 339 (…	-1.48832	-3.52837	-2.85377	0.146085	0.0014151	0.00789972	1	0.0321964	0.0507937
PDACT_KE332558.1_G005220	DNA-directed RNA polymerase subunit 10-like protein	0.450002	1.11559	1.07187	0.194147	0.00141898	0.00215667	1	0.0322548	0.0205551
PDACT_KE333565.1_G000510	Exostosin family protein LENGTH=415	0.28914	1.197	1.61331	0.438794	0.00143077	2.06679e-05	1	0.032365	0.000631478
PDACT_KE332554.1_G006260	NAD(P)-binding Rossmann-fold superfamily protein LENGTH=269	-0.172052	-1.21554	-1.53944	0.646912	0.00143058	6.33789e-05	1	0.032365	0.00148672
PDACT_KE332549.1_G006280	Dihydroxyacetone kinase LENGTH=593	0.00494148	-0.972088	-1.07191	0.986937	0.00143175	0.000453004	1	0.032365	0.00646124
PDACT_KE332748.1_G000540	Transmembrane protein 230	0.593005	1.33525	1.21649	0.154261	0.0014286	0.0036703	1	0.032365	0.0298893
PDACT_KE332649.1_G001800	ELMO domain-containing protein A	0.491105	1.35951	0.892288	0.243867	0.00142815	0.0349388	1	0.032365	0.137976
PDACT_KE333364.1_G000610	ABC transporter G family member 14	-0.519848	-2.19192	-1.44555	0.43088	0.00144045	0.0325216	1	0.0325017	0.131895
PDACT_KE332928.1_G000350	V-type ATP synthase subunit D	0.269285	1.00456	0.575225	0.390245	0.00143929	0.0669186	1	0.0325017	0.211802
PDACT_KE333719.1_G000190	F-box domain containing protein n=2 Tax=Andropogoneae RepID=B6TYX2 MAIZE	-0.276652	-2.19206	-4.36495	0.674292	0.00145273	9.77548e-09	1	0.0327485	1.5652e-06
PDACT_KE332939.1_G000100	NADPH--cytochrome P450 reductase	0.253054	-1.38355	-0.64191	0.550839	0.00146336	0.134036	1	0.0329578	0.3292
PDACT_KE333460.1_G000220	aldehyde oxidase 1 LENGTH=1368	-0.167131	-2.08065	-1.70785	0.79038	0.0014741	0.00845981	1	0.0331692	0.0531375
PDACT_KE332738.1_G000660	Protein kinase superfamily protein LENGTH=440	0.0184858	1.49771	1.22928	0.968753	0.00147868	0.00903483	1	0.0332115	0.0556115
PDACT_KE332655.1_G001540	prephenate dehydratase 1 LENGTH=424	-0.0995047	1.83087	0.975844	0.860282	0.00147785	0.0850575	1	0.0332115	0.247148
PDACT_KE332896.1_G000440	Cytochrome P450 superfamily protein LENGTH=539	-0.448197	-1.09111	-1.49071	0.187395	0.00148379	1.72857e-05	1	0.0332956	0.000550088
PDACT_KE333006.1_G000400	Protein of unknown function (DUF1295) LENGTH=305	-0.032141	-0.944463	-0.86005	0.913035	0.0014917	0.00380098	1	0.0334119	0.0305976
PDACT_KE332605.1_G000120	Ubiquitin-protein ligase, putative n=1 Tax=Ricinus communis RepID=B9T3S8 RICCO	-0.246719	-1.4749	-1.04398	0.585792	0.00149369	0.0235665	1	0.0334259	0.106506
PDACT_KE332604.1_G002040	Peroxidase superfamily protein LENGTH=324	0.29099	1.94246	2.19389	0.623009	0.00149752	0.000378323	1	0.0334811	0.00566306
PDACT_KE336772.1_G000120	Cytochrome P450 superfamily protein LENGTH=520	-0.223917	-3.69495	-2.90039	0.880756	0.00150365	0.0381488	1	0.0335874	0.146062
PDACT_KE332561.1_G003310	PYM protein n=3 Tax=Zea mays RepID=B6TLX6 MAIZE	0.525897	1.11224	1.44667	0.13319	0.00151765	4.20053e-05	1	0.0338196	0.0010904
PDACT_KE333382.1_G000370	Pentatricopeptide repeat-containing protein	-0.144715	1.25724	1.06491	0.712935	0.00151909	0.007079	1	0.0338196	0.0470857
PDACT_KE332576.1_G001370	oligopeptide transporter LENGTH=737	-1.64222	-3.06582	-2.04555	0.0736251	0.00151956	0.0279566	1	0.0338196	0.119722
PDACT_KE332591.1_G002850	glutamate-ammonia ligases;catalytics;glutamate-ammonia ligases LENGTH=852	-0.838324	-2.19852	-2.20866	0.20975	0.00152566	0.00155898	1	0.0339069	0.0161254
PDACT_KE332548.1_G003420	Chlorophyll synthase, chloroplastic	-0.556648	-0.938019	-1.40917	0.0585796	0.00152899	2.48956e-06	1	0.033937	0.000123741
PDACT_KE332614.1_G000630	Unknown protein	-0.645382	-1.03312	-0.964779	0.0462389	0.00153213	0.00307062	1	0.0339759	0.0264524
PDACT_KE332552.1_G001980	Protein kinase superfamily protein LENGTH=814	-0.220239	-1.00662	-1.32709	0.483582	0.00154082	3.54798e-05	1	0.034078	0.000952243
PDACT_KE332558.1_G001230	tubby like protein 1 LENGTH=455	-0.261544	-0.888591	-0.827034	0.347525	0.00154091	0.0031883	1	0.034078	0.0271271
PDACT_KE332939.1_G000440	Calmodulin-binding protein LENGTH=647	0.0585065	-0.814291	-0.687947	0.818686	0.00153916	0.00736478	1	0.034078	0.0482144
PDACT_KE332548.1_G004020	2-oxoglutarate (2OG) and Fe(II)-dependent oxygenase superfamily protein LENGTH=403	0.316488	1.15092	0.631063	0.380555	0.0015534	0.0811324	1	0.0343232	0.239902
PDACT_KE332571.1_G004700	10 kDa chaperonin	0.44104	1.1797	0.808915	0.231553	0.00155556	0.0289173	1	0.03434	0.122255
PDACT_KE332642.1_G000760	RNA-binding protein Nova-2	0.486353	-1.56283	-1.19039	0.311025	0.00156074	0.0153218	1	0.0344234	0.0797632
PDACT_KE332604.1_G002750	65-kDa microtubule-associated protein 3	0.292942	-1.83324	-0.917367	0.599929	0.00156338	0.105299	1	0.0344506	0.282148
PDACT_KE332678.1_G000260	Mitochondrial presequence protease	-0.435656	-0.997804	-0.964099	0.163966	0.0015686	0.00225035	1	0.0345346	0.0211843
PDACT_KE333068.1_G000580	cytochrome B5-like protein LENGTH=121	0.282919	-1.16494	-1.66707	0.434286	0.00157967	9.28649e-06	1	0.0346727	0.000340144
PDACT_KE332605.1_G003470	unknown protein; BEST Arabidopsis thaliana protein match is: unknown protein . LENGTH=207	0.43429	-0.94613	-0.798817	0.142279	0.00158054	0.00758491	1	0.0346727	0.049211
PDACT_KE332829.1_G000980	VASCULAR-RELATED NAC-DOMAIN 6 LENGTH=268	0.653507	1.13971	0.94781	0.0688142	0.00158011	0.00850692	1	0.0346727	0.053319
PDACT_KE332617.1_G001740	Protein of unknown function, DUF584 LENGTH=166	0.377543	1.582	2.40609	0.441717	0.00158502	2.92391e-06	1	0.03474	0.000139392
PDACT_KE332793.1_G000700	lipase 1 LENGTH=393	0.00313135	1.6769	1.75437	0.995302	0.00159683	0.000999536	1	0.0349675	0.0116079
PDACT_KE332549.1_G003860	Acyl-CoA N-acyltransferases (NAT) superfamily protein LENGTH=288	-0.126594	-1.05742	-0.953189	0.702002	0.00159881	0.00437423	1	0.0349797	0.0336429
PDACT_KE332868.1_G000470	TPX2 (targeting protein for Xklp2) protein family LENGTH=338	0.451179	2.00264	1.98696	0.464593	0.00160259	0.00175683	1	0.0350311	0.0175784
PDACT_KE332545.1_G006850	GDSL esterase/lipase	-0.76723	-2.84172	-1.83361	0.377936	0.00160509	0.0391152	1	0.0350544	0.148395
PDACT_KE332545.1_G010840	Ribonuclease 3-like protein 2	-0.587789	1.61405	1.54266	0.245519	0.00161107	0.00254546	1	0.0351226	0.02311
PDACT_KE333143.1_G000260	Tryptophan synthase beta chain 1	-0.52649	-1.03674	-1.61828	0.10638	0.00162239	1.35197e-06	1	0.0352777	7.77671e-05
PDACT_KE332632.1_G001420	Plant neutral invertase family protein LENGTH=616	0.15211	-0.941804	-1.25668	0.607398	0.00162084	2.98761e-05	1	0.0352777	0.000839547
PDACT_KE332772.1_G000700	Glycogen synthase	0.681413	1.13761	1.12958	0.0573372	0.00162361	0.00176227	1	0.0352777	0.0176215
PDACT_KE332818.1_G000140	tubulin alpha-4 chain LENGTH=450	0.480562	2.02967	1.2519	0.444468	0.00162395	0.048027	1	0.0352777	0.170277
PDACT_KE332919.1_G000630	RNA-binding protein 47	0.172606	0.961276	1.01026	0.568794	0.0016327	0.00094505	1	0.0354365	0.0111388
PDACT_KE332550.1_G000480	Pentatricopeptide repeat-containing protein	-0.172709	1.72963	1.52432	0.749517	0.00163748	0.00531838	1	0.0355087	0.0385452
PDACT_KE332578.1_G000920	glucan endo-1,3-beta-glucosidase-like protein 3 LENGTH=194	0.682828	2.66003	2.95947	0.385806	0.00163944	0.000553265	1	0.0355197	0.00756118
PDACT_KE332581.1_G001310	O-fucosyltransferase family protein LENGTH=652	0.298212	0.971946	0.930641	0.332712	0.00164261	0.00260046	1	0.035557	0.023473
PDACT_KE334585.1_G000110	F-box/RNI-like superfamily protein LENGTH=481	-0.792802	6.46575	0.641002	0.122452	0.0016447	0.555684	1	0.0355708	0.749055
PDACT_KE332608.1_G001510	Pentatricopeptide repeat-containing protein	-0.10806	1.23702	1.59915	0.781144	0.00167506	5.69181e-05	1	0.0361083	0.00136737
PDACT_KE333182.1_G000440	Protein kinase superfamily protein LENGTH=933	-0.228519	-0.832372	-1.02626	0.38497	0.0016732	0.000114104	1	0.0361083	0.00232806
PDACT_KE332833.1_G000840	Anaphase-promoting complex subunit 4	-0.392532	-1.25472	-0.909966	0.318221	0.00167545	0.0218824	1	0.0361083	0.101604
PDACT_KE332886.1_G000350	B3 domain-containing protein	-0.0415521	-0.959828	-0.993399	0.890512	0.00167824	0.0011748	1	0.0361367	0.0130792
PDACT_KE332591.1_G001340	ribonuclease 2 LENGTH=259	-0.0595269	-0.97952	-0.633202	0.846873	0.00168119	0.0412566	1	0.0361685	0.153583
PDACT_KE332776.1_G000320	Protein yippee-like	0.160534	-0.935496	-0.43435	0.585352	0.00168441	0.141838	1	0.036206	0.340711
PDACT_KE332822.1_G000350	Protein of unknown function (DUF567) LENGTH=220	-0.647477	-1.99885	-1.11273	0.292826	0.00168992	0.0743751	1	0.0362442	0.227158
PDACT_KE332575.1_G003410	DA1-related protein 2 LENGTH=528	-0.606247	-1.31077	-1.42326	0.141121	0.00169603	0.000686593	1	0.0362965	0.00881776
PDACT_KE332561.1_G000300	Lipoyl synthase, mitochondrial	-0.0699994	-0.790408	-0.836443	0.779559	0.00170139	0.000914652	1	0.0363795	0.0108431
PDACT_KE333062.1_G000590	Pectin lyase-like superfamily protein LENGTH=444	0.19961	1.12544	1.26968	0.575083	0.00170782	0.000420899	1	0.0364851	0.00612453
PDACT_KE332578.1_G003250	Scarecrow-like protein 23	0.554977	-1.49178	-1.40932	0.230477	0.00171072	0.00315069	1	0.0365152	0.0269287
PDACT_KE332550.1_G003580	Bifunctional dethiobiotin synthetase/adenosylmethionine-8-amino-7-oxononanoate aminotransferase n=2 Tax=Saprolegnia RepID=E6PBR3 SAPPC	-0.17966	-1.28102	-1.64327	0.654237	0.00171474	7.17381e-05	1	0.0365373	0.00163523
PDACT_KE332932.1_G000370	Anaphase-promoting complex subunit 11	-0.415068	1.46169	1.27588	0.373554	0.00171408	0.00609315	1	0.0365373	0.0423325
PDACT_KE333082.1_G000290	S-adenosyl-L-methionine-dependent methyltransferases superfamily protein LENGTH=684	0.629209	1.94443	1.42093	0.297163	0.00171974	0.0201138	1	0.0366121	0.0959633
PDACT_KE332578.1_G000850	FUNCTIONS IN: molecular function unknown; INVOLVED IN: regulation of transcription; LOCATED IN: nucleus, H4/H2A histone acetyltransferase complex; EXPRESSED IN: 23 plant structures; EXPRESSED DURING: 15 growth stages;	0.273819	1.24682	1.29116	0.490862	0.00172722	0.00121055	1	0.0367309	0.013398
PDACT_KE332939.1_G000310	Protein YIPF6	-0.389696	-1.98163	-1.85389	0.521975	0.00172832	0.00339175	1	0.0367309	0.0283637
PDACT_KE332595.1_G000800	Ubiquitin carboxyl-terminal hydrolase 44	0.488782	0.859371	0.747876	0.0743667	0.00174005	0.0064443	1	0.0369481	0.0439742
PDACT_KE332547.1_G001010	Diphosphomevalonate decarboxylase	0.694154	1.0166	1.23435	0.0318785	0.00174886	0.000154983	1	0.0371031	0.00291236
PDACT_KE332618.1_G001460	Serine carboxypeptidase S28 family protein LENGTH=482	-0.00895098	-0.809434	-0.863769	0.972183	0.00175667	0.00086455	1	0.0372294	0.0103695
PDACT_KE332545.1_G011730	SprT-like domain-containing protein Spartan	0.229218	1.91676	1.87947	0.703137	0.00176066	0.0021706	1	0.0372294	0.0206797
PDACT_KE332547.1_G006610	unknown protein; FUNCTIONS IN: molecular function unknown; INVOLVED IN: response to karrikin; LOCATED IN: endomembrane system; EXPRESSED IN: 23 plant structures; EXPRESSED DURING: 14 growth stages; BEST Arabidopsis thaliana protein match is: unknown protein . LENGTH=86	-0.460551	-3.0857	-3.03201	0.621671	0.00176163	0.00225578	1	0.0372294	0.0212272
PDACT_KE332582.1_G003210	2-isopropylmalate synthase 1 LENGTH=631	-0.254334	1.03514	0.848123	0.438665	0.00176083	0.0101641	1	0.0372294	0.0603782
PDACT_KE333023.1_G000380	Cathepsin L2	-0.791221	1.65314	-0.093921	0.128826	0.00176241	0.855978	1	0.0372294	0.932036
PDACT_KE332548.1_G000730	alpha/beta-Hydrolases superfamily protein LENGTH=390	0.0834168	-1.56292	-1.1898	0.863974	0.00176857	0.0163814	1	0.0373274	0.0832679
PDACT_KE332587.1_G002820	Oxalyl-CoA decarboxylase	-0.282573	-0.767618	-0.913664	0.247009	0.00177545	0.000210542	1	0.0373439	0.00367659
PDACT_KE332722.1_G001940	SKP1-like 12 LENGTH=152	-0.896021	-4.73336	-3.52376	0.494179	0.00177523	0.0139675	1	0.0373439	0.0747617
PDACT_KE332555.1_G000620	Thioredoxin superfamily protein LENGTH=186	-0.0636756	0.984139	0.599256	0.838312	0.00177301	0.0555978	1	0.0373439	0.18768
PDACT_KE339491.1_G000100	Unknown protein	-0.602649	-2.66969	-1.12606	0.470369	0.00177358	0.180858	1	0.0373439	0.396152
PDACT_KE332580.1_G003390	pectinesterase family protein LENGTH=968	0.271806	1.18933	1.24878	0.473194	0.00177775	0.00107032	1	0.0373602	0.012193
PDACT_KE333132.1_G000260	response regulator 3 LENGTH=231	-0.242744	-2.53039	-2.39632	0.753138	0.00178063	0.00328121	1	0.0373886	0.0276679
PDACT_KE332697.1_G000190	unknown protein; BEST Arabidopsis thaliana protein match is: unknown protein . LENGTH=447	0.556036	1.41325	1.44132	0.212857	0.00178276	0.00145977	1	0.0374014	0.0152995
PDACT_KE332670.1_G001150	thioredoxin 2 LENGTH=133	0.774618	1.36542	1.30554	0.073096	0.00178949	0.00279035	1	0.0375105	0.0246751
PDACT_KE332617.1_G001800	Double-stranded RNA-binding protein 6	-0.0451346	-0.863921	-1.77795	0.869387	0.0017948	3.5963e-10	1	0.0375253	1.04909e-07
PDACT_KE332604.1_G001540	tRNA pseudouridine synthase D	-0.185463	-1.02983	-1.46853	0.569174	0.00179385	1.13158e-05	1	0.0375253	0.000396683
PDACT_KE332626.1_G000380	Protein kinase superfamily protein LENGTH=432	0.359503	1.01083	0.720539	0.264858	0.00179177	0.0257201	1	0.0375253	0.113069
PDACT_KE333108.1_G000180	Transmembrane protein 19	0.159496	0.779628	0.664261	0.522018	0.00180664	0.00782912	1	0.0376125	0.0504722
PDACT_KE332986.1_G000180	PLANT CADMIUM RESISTANCE 2 LENGTH=152	0.640541	2.05704	1.5711	0.316188	0.00180583	0.0156167	1	0.0376125	0.0807667
PDACT_KE332676.1_G001920	FKBP-like peptidyl-prolyl cis-trans isomerase family protein LENGTH=256	-0.196348	0.883159	0.614051	0.485735	0.00180362	0.0295373	1	0.0376125	0.123744
PDACT_KE332574.1_G002120	Long-chain-alcohol oxidase FAO1	-0.0216776	1.72278	1.13814	0.967916	0.00180537	0.0365381	1	0.0376125	0.142064
PDACT_KE332553.1_G001940	Chaperone protein DnaJ	-0.217544	-1.04611	-0.51552	0.512008	0.00180552	0.121084	1	0.0376125	0.308713
PDACT_KE332646.1_G001060	Adenosylhomocysteinase	-0.261943	-1.38882	-2.13394	0.54746	0.00180837	3.38356e-06	1	0.0376165	0.000153254
PDACT_KE332615.1_G002830	unknown protein; BEST Arabidopsis thaliana protein match is: unknown protein . LENGTH=589	-0.1163	1.10999	1.68306	0.741736	0.00181583	3.0958e-06	1	0.0376291	0.00014477
PDACT_KE332561.1_G001490	PLATZ transcription factor family protein LENGTH=213	-0.410251	-2.75426	-4.45774	0.621811	0.00181767	3.19046e-06	1	0.0376291	0.000148347
PDACT_KE332823.1_G000760	Photosystem II 10 kDa polypeptide, chloroplastic	0.740341	1.585	2.2522	0.137846	0.00181583	1.45547e-05	1	0.0376291	0.000476165
PDACT_KE332547.1_G002740	ADP-ribosylation factor 1 LENGTH=181	0.0656703	-0.942294	-1.00204	0.825488	0.00181381	0.000965525	1	0.0376291	0.0113202
PDACT_KE332546.1_G005040	Loricrin-like protein n=2 Tax=Oryza sativa RepID=Q69JW8 ORYSJ	-0.423877	-1.02872	-0.959051	0.194748	0.00181508	0.00361435	1	0.0376291	0.0295631
PDACT_KE332611.1_G001410	Deoxyribodipyrimidine photo-lyase	0.149487	-0.892269	-0.670696	0.59844	0.00181972	0.0186915	1	0.0376291	0.091415
PDACT_KE332783.1_G000390	far-red elongated hypocotyl 1 LENGTH=202	0.065918	-0.987481	-0.564441	0.833135	0.0018194	0.0727215	1	0.0376291	0.224062
PDACT_KE332581.1_G000190	Telomere repeat-binding protein 6	-0.128994	-0.750686	-0.550042	0.589779	0.00182259	0.0220381	1	0.0376566	0.102075
PDACT_KE332566.1_G000410	Prenylcysteine oxidase 1	-0.254725	1.02166	0.929733	0.435065	0.00182511	0.00451981	1	0.037677	0.0343848
PDACT_KE332938.1_G000440	alpha-galactosidase 1 LENGTH=410	0.339107	1.21479	2.39475	0.380185	0.00182972	2.84884e-09	1	0.0377177	5.96649e-07
PDACT_KE332811.1_G000840	Proteasome-associated ATPase	0.83957	1.98338	3.09938	0.178404	0.00183503	2.98842e-06	1	0.0377177	0.000140553
PDACT_KE332574.1_G000780	BEST Arabidopsis thaliana protein match is: kinectin-related . LENGTH=338	0.0647818	-0.79449	-0.905968	0.797677	0.00183199	0.000400103	1	0.0377177	0.00590255
PDACT_KE332568.1_G005090	callose synthase 1 LENGTH=1950	0.483937	-1.72413	-1.75039	0.364923	0.00183632	0.00172293	1	0.0377177	0.0173112
PDACT_KE332698.1_G000690	RING/U-box superfamily protein LENGTH=232	0.332117	-0.946839	-0.905173	0.270419	0.00183423	0.00288189	1	0.0377177	0.0252297
PDACT_KE332728.1_G000450	DHHC-type zinc finger family protein LENGTH=254	0.0248866	-0.896977	-0.785366	0.930297	0.00183528	0.00635343	1	0.0377177	0.0435116
PDACT_KE332781.1_G000550	V-type proton ATPase subunit E	0.454191	1.01217	0.703537	0.159951	0.00184459	0.0298499	1	0.0378558	0.124649
PDACT_KE332548.1_G007770	unknown protein; BEST Arabidopsis thaliana protein match is: unknown protein . LENGTH=540	0.062565	1.4444	1.53929	0.893725	0.00185248	0.000964558	1	0.0379858	0.0113143
PDACT_KE332552.1_G006120	Chaperone protein DnaJ	-0.260841	-2.2872	-1.8318	0.710326	0.00185909	0.0118726	1	0.0380577	0.0666191
PDACT_KE332581.1_G002300	RING/U-box superfamily protein LENGTH=197	-0.122429	1.33456	1.70737	0.773135	0.00186384	8.08695e-05	1	0.0381232	0.00178364
PDACT_KE332546.1_G007910	Acyl-ACP thioesterase LENGTH=367	0.437723	-0.81425	-0.831129	0.0920797	0.00186733	0.00151619	1	0.0381627	0.0157628
PDACT_KE332677.1_G002180	Chaperone protein DnaJ	0.544998	1.45086	1.81407	0.23816	0.00188624	0.000119844	1	0.0383254	0.00240794
PDACT_KE333205.1_G000140	Thioredoxin superfamily protein LENGTH=194	0.0231	1.14223	1.05748	0.950006	0.00188566	0.00404478	1	0.0383254	0.0318898
PDACT_KE332825.1_G000140	UDP-Glycosyltransferase superfamily protein LENGTH=489	-0.863353	-2.69965	-2.14742	0.301893	0.00188271	0.0129945	1	0.0383254	0.0709484
PDACT_KE332547.1_G006510	carotenoid isomerase LENGTH=595	-0.0865037	-1.27649	-0.951441	0.830531	0.00188515	0.0197067	1	0.0383254	0.0945794
PDACT_KE332692.1_G001520	Cytochrome P450 superfamily protein LENGTH=513	0.59644	2.67165	1.60628	0.460839	0.00187869	0.0520975	1	0.0383254	0.179752
PDACT_KE332899.1_G000420	FAD-binding Berberine family protein LENGTH=530	0.876165	4.71282	2.17649	0.424217	0.00187732	0.0827639	1	0.0383254	0.242916
PDACT_KE333239.1_G000370	Transcription factor ILR3	1.08261	2.05339	0.952818	0.0939156	0.00188399	0.13995	1	0.0383254	0.337964
PDACT_KE332549.1_G006200	calmodulin 5 LENGTH=181	-0.0448408	-0.843503	-0.889667	0.867878	0.00190063	0.00107133	1	0.0385857	0.0121932
PDACT_KE332553.1_G005380	C2H2-like zinc finger protein LENGTH=467	-0.016193	-0.952376	-1.28307	0.95746	0.00190586	3.38407e-05	1	0.0386599	0.000917292
PDACT_KE332715.1_G001760	Protein kinase superfamily protein LENGTH=557	0.241021	-1.73624	-2.20441	0.656142	0.00190988	0.000121543	1	0.0387093	0.00243324
PDACT_KE333086.1_G000400	Pentatricopeptide repeat (PPR) superfamily protein LENGTH=577	0.154896	1.43686	1.37498	0.736552	0.00191303	0.00297924	1	0.0387411	0.0258694
PDACT_KE332630.1_G000790	MYB transcription factor-like n=3 Tax=Oryza RepID=Q5Z6X2 ORYSJ	0.153742	2.67492	1.91188	0.851292	0.00193342	0.0215903	1	0.0391219	0.100771
PDACT_KE332546.1_G006890	protein arginine methyltransferase 10 LENGTH=383	0.25515	-1.28812	-2.01028	0.53162	0.00193518	2.46792e-06	1	0.0391252	0.000122915
PDACT_KE332577.1_G001690	SKP1-interacting partner 15	-0.021666	-1.41539	-0.923658	0.96108	0.0019381	0.0409428	1	0.0391518	0.152866
PDACT_KE332562.1_G004130	Calcium-binding EF hand family protein LENGTH=391	0.114601	-0.945809	-1.1298	0.70372	0.00194146	0.000236298	1	0.0391552	0.00403221
PDACT_KE333178.1_G000170	16.6 kDa heat shock protein	-0.743681	-2.78631	-1.00086	0.390071	0.00194113	0.250902	1	0.0391552	0.48247
PDACT_KE333532.1_G000300	Protein of unknown function (DUF760) LENGTH=368	-0.0046	0.931874	1.50033	0.987717	0.00194746	8.35983e-07	1	0.039244	5.26605e-05
PDACT_KE332618.1_G001580	Serine carboxypeptidase S28 family protein LENGTH=488	-0.251949	-0.834451	-1.3412	0.34623	0.00195307	8.91826e-07	1	0.0392923	5.57482e-05
PDACT_KE332911.1_G000140	Histone-lysine N-methyltransferase setd3	-0.536579	-0.899823	-1.25557	0.0634332	0.00196006	1.82636e-05	1	0.0394005	0.00057329
PDACT_KE332597.1_G001900	Dolichyldiphosphatase 1	0.300204	-1.18674	-1.63575	0.426714	0.00198258	2.76014e-05	1	0.0397879	0.000790123
PDACT_KE332625.1_G001120	Nuclear FMRP-interacting protein n=1 Tax=Arabidopsis thaliana RepID=Q5BPJ1 ARATH	0.454885	1.7525	1.08484	0.4153	0.00200021	0.0528541	1	0.0401089	0.181417
PDACT_KE332639.1_G001490	FKBP-like peptidyl-prolyl cis-trans isomerase family protein LENGTH=230	-0.416933	-0.981013	-1.1681	0.185625	0.00200408	0.000249315	1	0.0401368	0.00420745
PDACT_KE332598.1_G002400	Protein kinase superfamily protein LENGTH=462	-1.86939	-3.69606	-3.69606	0.215393	0.00200651	0.00255679	1	0.0401368	0.0231786
PDACT_KE332591.1_G001140	C2 domain-containing protein / GRAM domain-containing protein LENGTH=594	-0.137524	-1.09433	-0.677082	0.693646	0.00200523	0.0542386	1	0.0401368	0.184772
PDACT_KE332695.1_G000720	unknown protein; LOCATED IN: chloroplast; BEST Arabidopsis thaliana protein match is: unknown protein . LENGTH=255	-0.138502	-1.74524	-2.1744	0.799958	0.00200859	0.000161481	1	0.0401455	0.00300907
PDACT_KE332958.1_G000940	plastid developmental protein DAG, putative LENGTH=229	-0.0185895	0.860471	0.745057	0.946492	0.00201345	0.00740801	1	0.0401976	0.0483811
PDACT_KE332672.1_G000500	adenine phosphoribosyltransferase 5 LENGTH=191	-0.0330543	1.59141	-0.065442	0.94785	0.00201447	0.897093	1	0.0401976	0.952608
PDACT_KE332553.1_G003080	Thioredoxin superfamily protein LENGTH=233	0.466152	1.19298	1.13617	0.224637	0.00202472	0.00327785	1	0.0402622	0.0276586
PDACT_KE332656.1_G001360	WD repeat-containing protein 24 homolog	0.206652	1.02375	0.902084	0.529991	0.00202184	0.00644126	1	0.0402622	0.0439656
PDACT_KE332647.1_G001880	Small nuclear ribonucleoprotein family protein LENGTH=114	0.383184	0.940958	0.643415	0.206371	0.00202445	0.0342723	1	0.0402622	0.136421
PDACT_KE332940.1_G000430	Pectinacetylesterase family protein LENGTH=391	-0.202051	1.53443	0.0758016	0.680674	0.00202593	0.876976	1	0.0402622	0.942381
PDACT_KE332623.1_G001070	WRKY family transcription factor family protein LENGTH=557	-0.218591	-2.18731	-3.11274	0.747805	0.00203133	2.72335e-05	1	0.0403134	0.000780503
PDACT_KE332643.1_G001080	unknown protein; BEST Arabidopsis thaliana protein match is: unknown protein . LENGTH=207	-0.102189	-0.827952	-0.637441	0.701116	0.00203179	0.017277	1	0.0403134	0.0865227
PDACT_KE333055.1_G000870	DNA-3-methyladenine glycosylase 1	-0.243367	0.846923	0.796191	0.376084	0.00203452	0.00375428	1	0.0403349	0.0303814
PDACT_KE332566.1_G001110	unknown protein; FUNCTIONS IN: molecular function unknown; INVOLVED IN: biological process unknown; LOCATED IN: chloroplast; EXPRESSED IN: 19 plant structures; EXPRESSED DURING: 13 growth stages; Has 60 Blast hits to 60 proteins in 24 species: Archae - 0; Bacteria - 14; Metazoa - 0; Fungi - 0; Plants - 45; Viruses - 0; Other Eukaryotes - 1 (source: NCBI BLink). LENGTH=241	-0.283211	-0.859883	-1.09326	0.306434	0.0020474	9.63255e-05	1	0.0405313	0.00203831
PDACT_KE332850.1_G000980	RING/U-box superfamily protein LENGTH=343	-0.378599	1.48438	1.24592	0.435809	0.00204939	0.00952314	1	0.0405313	0.057704
PDACT_KE332715.1_G000460	mitochondrial processing peptidase alpha subunit LENGTH=499	0.522802	1.46883	1.17011	0.265725	0.00204889	0.0134908	1	0.0405313	0.0729416
PDACT_KE332554.1_G006550	unknown protein; BEST Arabidopsis thaliana protein match is: unknown protein . LENGTH=258	0.85238	1.73487	1.5242	0.124251	0.00205334	0.00660171	1	0.0405766	0.0446997
PDACT_KE332711.1_G000970	Pre-mRNA-splicing factor RBM22	0.297501	1.18584	1.10179	0.433659	0.00205504	0.00412318	1	0.0405775	0.0323
PDACT_KE332614.1_G002980	protein n=1 Tax=Oryza sativa subsp. japonica RepID=C7J6K1 ORYSJ	0.341768	1.21841	1.43963	0.381371	0.00206389	0.000294119	1	0.0407195	0.00471669
PDACT_KE332577.1_G002020	sequence-specific DNA binding transcription factors LENGTH=443	0.77721	1.39321	1.37697	0.0841085	0.00207135	0.00236915	1	0.0408337	0.0219832
PDACT_KE332575.1_G002930	UDP-Glycosyltransferase superfamily protein LENGTH=489	-0.246703	-1.64168	-2.15434	0.634113	0.00207513	7.77676e-05	1	0.0408755	0.00172924
PDACT_KE332567.1_G000710	dicer-like 1 LENGTH=1910	0.127155	-0.882243	-0.958413	0.654426	0.00208365	0.000849896	1	0.0410103	0.0102747
PDACT_KE332651.1_G001250	Tic22-like family protein LENGTH=529	1.08363	2.17407	3.06255	0.114771	0.00209018	2.85227e-05	1	0.0411057	0.000808935
PDACT_KE332995.1_G000500	calcineurin B-like 3 LENGTH=230	0.0565019	-0.747839	-0.540192	0.814696	0.00209304	0.0259899	1	0.0411291	0.114009
PDACT_KE332677.1_G002200	Chaperone protein dnaJ 2	0.122972	1.5069	2.46501	0.800137	0.00209829	1.02682e-06	1	0.041166	6.25899e-05
PDACT_KE332906.1_G001030	Ethylene-responsive transcription factor 1	-0.932175	2.39346	2.87212	0.201881	0.00209701	0.000299293	1	0.041166	0.00477777
PDACT_KE332601.1_G003200	Ankyrin repeat family protein LENGTH=590	0.48915	1.36496	1.54941	0.266613	0.00210202	0.000516058	1	0.0412064	0.00716014
PDACT_KE332552.1_G002640	Pentatricopeptide repeat-containing protein	-0.112771	0.957421	0.736623	0.71624	0.00210586	0.0177421	1	0.0412485	0.0880819
PDACT_KE332830.1_G000470	receptor-like protein kinase 2 LENGTH=1151	0.333539	4.87208	0	0.291917	0.00211919	1	1	0.0414434	1
PDACT_KE332655.1_G002180	Homeobox-leucine zipper protein family LENGTH=278	0.558247	-0.97157	-1.78873	0.0753239	0.00212676	3.22875e-08	1	0.041459	3.95586e-06
PDACT_KE332546.1_G003920	Pentatricopeptide repeat-containing protein	0.345985	1.3209	1.24575	0.416867	0.00212525	0.00373992	1	0.041459	0.0303152
PDACT_KE332551.1_G003290	Protein BPS1, chloroplastic	1.09136	1.99156	1.8103	0.0846066	0.00212569	0.00497736	1	0.041459	0.0368252
PDACT_KE333473.1_G000100	NADPH--cytochrome P450 reductase	0.128356	-1.07791	-0.559655	0.710069	0.00212468	0.107612	1	0.041459	0.286561
PDACT_KE333158.1_G000460	Cyclin-dependent kinases regulatory subunit 1	0.175777	0.897566	0.907194	0.545294	0.0021359	0.00192483	1	0.0415711	0.0188438
PDACT_KE332602.1_G000230	Bax inhibitor-1 family protein LENGTH=239	1.53083	-4.80545	-0.108732	0.330755	0.00213509	0.943196	1	0.0415711	0.975193
PDACT_KE332664.1_G000890	2-oxoglutarate (2OG) and Fe(II)-dependent oxygenase superfamily protein LENGTH=361	-0.850734	-1.51363	-0.586053	0.0798401	0.00214024	0.225857	1	0.0416225	0.45323
PDACT_KE332634.1_G001510	ethylene-responsive nuclear protein / ethylene-regulated nuclear protein (ERT2) LENGTH=405	0.680404	1.45368	2.26654	0.149314	0.00214264	2.70985e-06	1	0.0416362	0.00013123
PDACT_KE332708.1_G000200	Protein phosphatase 2C family protein LENGTH=468	0.0529038	0.838136	0.933061	0.845962	0.00214721	0.000651952	1	0.041692	0.00851056
PDACT_KE332603.1_G002260	flowering promoting factor 1 LENGTH=110	1.356	4.96696	-0.0194035	0.238325	0.00215236	0.994452	1	0.0417588	0.998211
PDACT_KE332715.1_G001290	transcription factor-related LENGTH=650	0.262452	-0.866857	-0.680256	0.348977	0.00215782	0.0158347	1	0.0418316	0.0814472
PDACT_KE332703.1_G001030	Reticulon family protein LENGTH=203	0.709222	1.86413	2.45326	0.237409	0.00216234	7.54408e-05	1	0.0418416	0.00169483
PDACT_KE332545.1_G011370	Cytochrome c oxidase biogenesis protein Cmc1-like LENGTH=95	-0.0220431	1.10567	1.18268	0.951161	0.00216345	0.00106398	1	0.0418416	0.0121434
PDACT_KE332590.1_G001890	unknown protein; BEST Arabidopsis thaliana protein match is: unknown protein . LENGTH=540	0.0835867	1.23122	1.02665	0.835393	0.00216264	0.010551	1	0.0418416	0.0618785
PDACT_KE332768.1_G000880	BAG family molecular chaperone regulator 1	0.381869	-1.37554	-1.92708	0.384968	0.0021738	2.64575e-05	1	0.0419754	0.00076668
PDACT_KE333081.1_G000430	sodium hydrogen exchanger 5 LENGTH=521	0.173897	-1.23517	-1.01463	0.660868	0.00217229	0.0114972	1	0.0419754	0.0650942
PDACT_KE332551.1_G004300	2-succinylbenzoate--CoA ligase	1.02576	4.6041	1.95445	0.374343	0.00217986	0.117257	1	0.0420593	0.302694
PDACT_KE332607.1_G002650	Lariat debranching enzyme	-0.0815826	-1.35351	-1.3798	0.849296	0.00219773	0.00196136	1	0.0423707	0.0191098
PDACT_KE332694.1_G001510	U-box domain-containing protein 4	0.236318	0.960763	1.38742	0.44837	0.00221251	1.19611e-05	1	0.0426221	0.000413392
PDACT_KE332574.1_G003110	Mitochondrial import inner membrane translocase subunit tim16	0.225068	1.03838	1.45567	0.50672	0.00222096	2.11748e-05	1	0.0426507	0.000642958
PDACT_KE332581.1_G002750	TRICHOME BIREFRINGENCE-LIKE 16 LENGTH=551	-0.987701	-3.0833	-3.94742	0.293986	0.00221676	0.00016697	1	0.0426507	0.00307396
PDACT_KE332571.1_G004090	tobamovirus multiplication 2A LENGTH=280	0.155776	0.825673	1.00597	0.562273	0.00221952	0.000203311	1	0.0426507	0.00357384
PDACT_KE332851.1_G000110	Unknown protein	0.369828	-1.90869	-1.6156	0.536894	0.00221978	0.00972591	1	0.0426507	0.0584987
PDACT_KE332558.1_G002340	Thioredoxin superfamily protein LENGTH=174	0.0359207	-1.97255	-1.65233	0.953801	0.00222854	0.00993874	1	0.0427294	0.0594432
PDACT_KE333104.1_G000560	Ras-related protein Rab-25	0.0996664	1.73098	1.06444	0.858139	0.00222764	0.0575169	1	0.0427294	0.192123
PDACT_KE332684.1_G002470	Chloroplastic group IIA intron splicing facilitator CRS1, chloroplastic	-0.234682	0.785232	0.811784	0.360026	0.00224581	0.0015983	1	0.0429757	0.0164126
PDACT_KE332591.1_G002500	5-dehydro-2-deoxygluconokinase	0.154617	-2.19068	-2.14463	0.821717	0.00224665	0.00273203	1	0.0429757	0.0242909
PDACT_KE333498.1_G000130	Unknown protein	0.645717	1.0718	1.5395	0.0641031	0.00225116	1.4229e-05	1	0.0430165	0.000468639
PDACT_KE332726.1_G001500	Pyruvate kinase family protein LENGTH=510	0.248605	-1.1997	-1.29275	0.518061	0.00225283	0.0010733	1	0.0430165	0.0122099
PDACT_KE332553.1_G000820	Alanine--tRNA ligase	0.319589	-0.867393	-0.801821	0.256577	0.00225405	0.00473878	1	0.0430165	0.0354887
PDACT_KE332797.1_G000590	Plant invertase/pectin methylesterase inhibitor superfamily protein LENGTH=178	-0.523565	-3.49183	-5.05667	0.627932	0.00225868	1.15631e-05	1	0.0430379	0.000402475
PDACT_KE332563.1_G004100	Endoglucanase 9	0.10703	1.39	1.38271	0.81228	0.00225816	0.00240604	1	0.0430379	0.0222733
PDACT_KE332972.1_G000270	Taxadiene synthase	-1.24482	2.24096	1.25613	0.0808936	0.00226791	0.0781038	1	0.0431801	0.233968
PDACT_KE334624.1_G000120	UDP-Glycosyltransferase superfamily protein LENGTH=453	0.451493	-1.16327	-1.15318	0.230548	0.00226987	0.00248485	1	0.0431838	0.0227475
PDACT_KE332563.1_G000150	U2 small nuclear ribonucleoprotein B LENGTH=232	0.186991	0.855324	0.610915	0.502598	0.00227185	0.0288805	1	0.043188	0.122162
PDACT_KE336859.1_G000100	Rubredoxin-like superfamily protein LENGTH=154	-0.112516	2.13219	0.187157	0.867016	0.00227789	0.78077	1	0.0432357	0.891726
PDACT_KE333738.1_G000150	unknown protein; Has 30201 Blast hits to 17322 proteins in 780 species: Archae - 12; Bacteria - 1396; Metazoa - 17338; Fungi - 3422; Plants - 5037; Viruses - 0; Other Eukaryotes - 2996 (source: NCBI BLink). LENGTH=245	0.127461	-1.38617	-0.68276	0.77471	0.00228042	0.127634	1	0.0432504	0.318778
PDACT_KE332587.1_G003950	protein n=2 Tax=Oryza sativa RepID=Q6L5F9 ORYSJ	-0.0277827	-2.81164	-3.6408	0.975032	0.00228607	8.27378e-05	1	0.0432904	0.00181505
PDACT_KE332678.1_G001520	phosphatidylinositol-4-phosphate 5-kinase 1 LENGTH=752	0.014438	-0.931664	-0.891788	0.961802	0.00228543	0.00357819	1	0.0432904	0.0293872
PDACT_KE332568.1_G003850	4-methyl-5(B-hydroxyethyl)-thiazole monophosphate biosynthesis protein n=16 Tax=Ectothiorhodospiraceae RepID=UPI00035C3274	0.644304	1.02005	1.23086	0.0527804	0.00229256	0.000249109	1	0.0433201	0.00420688
PDACT_KE332644.1_G000460	GDP-L-galactose phosphorylase 2	0.211624	-0.88247	-0.568971	0.459029	0.00229294	0.0482263	1	0.0433201	0.170624
PDACT_KE332594.1_G001470	Phosphofructokinase family protein LENGTH=617	-0.216029	-1.18101	-0.591367	0.571371	0.00229148	0.12297	1	0.0433201	0.311481
PDACT_KE332657.1_G000970	Mitochondrial substrate carrier family protein LENGTH=428	-0.0763075	0.789732	0.74331	0.768256	0.00230375	0.00413983	1	0.0434909	0.032389
PDACT_KE332615.1_G001780	Cytochrome P450 superfamily protein LENGTH=513	0.208728	-1.39503	-2.1998	0.642566	0.00232995	2.91945e-06	1	0.0439515	0.000139392
PDACT_KE332552.1_G000470	PP2A regulatory subunit TAP46	1.04055	1.58248	2.3748	0.0431374	0.00233818	8.43156e-06	1	0.0440728	0.000317369
PDACT_KE332547.1_G006130	Beta-glucosidase C	-0.688551	1.49119	1.91443	0.160534	0.00234445	0.000111891	1	0.0440893	0.00229245
PDACT_KE332680.1_G000230	Calmodulin-binding protein LENGTH=601	-0.215898	-1.15072	-1.28531	0.563029	0.00234363	0.000710597	1	0.0440893	0.00900334
PDACT_KE332559.1_G006240	metacaspase 1 LENGTH=367	-0.22739	-1.13606	-1.15261	0.53695	0.00234202	0.00204633	1	0.0440893	0.019726
PDACT_KE332762.1_G001030	Chaperone protein DnaK	0.758193	1.27498	0.926552	0.0680161	0.00235665	0.0261012	1	0.0442847	0.114354
PDACT_KE332607.1_G001740	GRAS family transcription factor LENGTH=584	0.426468	1.05125	1.45393	0.214441	0.00236273	3.08989e-05	1	0.0443405	0.000859418
PDACT_KE332547.1_G000200	Ribonuclease HII	0.336743	1.02512	1.16873	0.315371	0.00236324	0.000550629	1	0.0443405	0.00753357
PDACT_KE333377.1_G000520	Elongation factor 4	-0.538884	-1.32048	-1.92215	0.207236	0.00236625	1.54325e-05	1	0.044363	0.000501535
PDACT_KE332689.1_G001290	EFR3-like protein n=1 Tax=Medicago truncatula RepID=G7JTI7 MEDTR	-0.33336	-1.67737	-1.34486	0.534022	0.00237678	0.0143322	1	0.0444925	0.0761041
PDACT_KE333581.1_G000220	Bifunctional uridylyltransferase/uridylyl-removing enzyme	0.00231113	-1.16142	-0.526917	0.99511	0.00237953	0.163613	1	0.04451	0.372617
PDACT_KE332578.1_G000830	14-3-3-like protein GF14 epsilon	0.0625048	-0.902753	-1.83353	0.83181	0.00238711	1.93222e-09	1	0.0446177	4.40832e-07
PDACT_KE333010.1_G000580	Protein of unknown function (DUF707) LENGTH=438	0.299072	-1.21676	-0.556702	0.447395	0.00240407	0.159774	1	0.0448409	0.367995
PDACT_KE332610.1_G000230	Heavy metal transport/detoxification superfamily protein LENGTH=115	1.00272	-1.58377	-1.43108	0.0503861	0.00241075	0.00600846	1	0.0449225	0.0420197
PDACT_KE332878.1_G000780	CYCLIN D1;1 LENGTH=339	0.438001	-1.96842	-2.3492	0.483569	0.00241528	0.000411729	1	0.0449727	0.00602801
PDACT_KE333358.1_G000200	Glucan endo-1,3-beta-glucosidase 11	0.0631742	1.38186	1.68204	0.888222	0.00241827	0.00025082	1	0.0449941	0.00422994
PDACT_KE332610.1_G000150	Histone-lysine N-methyltransferase 2A	-0.135102	-1.32417	-1.39211	0.752103	0.00242642	0.00154479	1	0.0451116	0.0160057
PDACT_KE332602.1_G000580	Protein FLUORESCENT IN BLUE LIGHT, chloroplastic	-0.100061	0.934612	0.742904	0.745593	0.00243696	0.0159394	1	0.0452731	0.0817749
PDACT_KE333731.1_G000210	glutamate-1-semialdehyde-2,1-aminomutase LENGTH=474	0.415233	1.04913	0.999831	0.226787	0.00243932	0.00385802	1	0.0452826	0.0309045
PDACT_KE332700.1_G000230	Palmitoyl-protein thioesterase 1	0.252446	0.897063	1.05866	0.390651	0.00244666	0.00036437	1	0.0453845	0.00553583
PDACT_KE332970.1_G000420	Nucleoside-triphosphatase THEP1	-0.290297	-0.852209	-0.521475	0.298872	0.00246928	0.06273	1	0.0457695	0.20283
PDACT_KE332647.1_G001130	elongation factor Ts family protein LENGTH=953	0.645167	1.49525	1.36784	0.1872	0.00247335	0.0055775	1	0.0458102	0.0398216
PDACT_KE332661.1_G000330	K(+)-insensitive pyrophosphate-energized proton pump	-1.16404	-2.36887	-4.51562	0.123421	0.00248408	1.40984e-07	1	0.0459742	1.30858e-05
PDACT_KE332557.1_G005430	2-succinylbenzoate--CoA ligase	-0.072466	1.1286	2.15388	0.84433	0.00249968	2.11751e-08	1	0.0462184	2.94816e-06
PDACT_KE332601.1_G002530	Magnesium transporter NIPA2	-0.441299	-1.51684	-0.855301	0.367655	0.00250105	0.0841431	1	0.0462184	0.245458
PDACT_KE332680.1_G000680	Protein of unknown function, DUF538 LENGTH=156	0.734419	1.6856	1.62011	0.180523	0.00250398	0.00363117	1	0.0462379	0.0296495
PDACT_KE332570.1_G002440	Cation/H(+) antiporter 15	-0.880609	-3.11158	-2.31008	0.389288	0.00251383	0.0263228	1	0.0463846	0.114894
PDACT_KE332564.1_G003670	FKBP-like peptidyl-prolyl cis-trans isomerase family protein LENGTH=207	0.189709	1.23262	1.16653	0.638692	0.00251784	0.00423905	1	0.0464157	0.0329653
PDACT_KE332616.1_G001130	Genomic DNA, chromosome 3, P1 clone: MFJ20 n=1 Tax=Arabidopsis thaliana RepID=Q9LSJ7 ARATH	-0.253165	-1.81369	-1.6324	0.662333	0.00252119	0.00665596	1	0.0464157	0.0449263
PDACT_KE333278.1_G000210	unknown protein;	0.600462	1.01254	1.89885	0.0722759	0.00252775	2.92483e-08	1	0.0464318	3.74162e-06
PDACT_KE333329.1_G000170	RNA-binding protein 8A	-0.174396	-1.07411	-1.3177	0.619262	0.00252424	0.000237804	1	0.0464318	0.00404944
PDACT_KE332736.1_G001240	Terpenoid cyclases/Protein prenyltransferases superfamily protein LENGTH=611	0	4.13235	4.71649	1	0.00252725	0.00142112	1	0.0464318	0.0150229
PDACT_KE333014.1_G000520	Plant protein of unknown function (DUF863) LENGTH=896	-0.500508	-1.3311	-0.560478	0.24801	0.00253383	0.19654	1	0.0465085	0.416502
PDACT_KE332549.1_G001950	Transmembrane amino acid transporter family protein LENGTH=436	-0.127835	-0.824486	-1.15181	0.636921	0.00253662	2.93507e-05	1	0.046525	0.000827628
PDACT_KE333070.1_G000320	Double-stranded RNA-binding protein 4	-0.000350016	0.764305	1.11223	0.998894	0.00254294	1.24629e-05	1	0.0466061	0.000423566
PDACT_KE332558.1_G004400	ATP-dependent DNA helicase Q-like 4A	-0.280117	-1.6413	-2.71211	0.595415	0.00255218	2.52631e-06	1	0.0466068	0.000125313
PDACT_KE333114.1_G000450	Pre-rRNA-processing protein ESF2	0.568855	0.849342	1.2764	0.0429401	0.00255124	6.80298e-06	1	0.0466068	0.000265446
PDACT_KE333306.1_G000150	SBP (S-ribonuclease binding protein) family protein LENGTH=340	-0.220891	1.30539	1.44842	0.608443	0.0025503	0.00085425	1	0.0466068	0.0103051
PDACT_KE332682.1_G002190	unknown protein; FUNCTIONS IN: molecular function unknown; INVOLVED IN: biological process unknown; LOCATED IN: chloroplast thylakoid membrane, chloroplast, chloroplast envelope; BEST Arabidopsis thaliana protein match is: unknown protein . LENGTH=427	-0.193084	0.982303	0.894599	0.550802	0.0025527	0.00595695	1	0.0466068	0.041801
PDACT_KE333173.1_G000310	ubiquitin-conjugating enzyme 32 LENGTH=309	-0.13335	-0.851595	-0.382959	0.633626	0.00255078	0.172195	1	0.0466068	0.384582
PDACT_KE332857.1_G000880	early nodulin-like protein 8 LENGTH=191	0.125906	1.99496	1.26851	0.844692	0.00255811	0.0513869	1	0.0466398	0.178431
PDACT_KE332677.1_G002210	Chaperone protein dnaJ 2	0.904181	1.34166	1.85023	0.0407411	0.002565	4.1032e-05	1	0.0466628	0.00107246
PDACT_KE332557.1_G001150	Pentatricopeptide repeat (PPR) superfamily protein LENGTH=599	-0.179035	0.924771	0.904597	0.558175	0.00256427	0.00319287	1	0.0466628	0.0271295
PDACT_KE332673.1_G001440	Protein of unknown function (DUF3537) LENGTH=452	0.136221	1.20131	0.383548	0.730939	0.00256508	0.333638	1	0.0466628	0.567425
PDACT_KE332562.1_G002240	Protein of unknown function (DUF1645) LENGTH=272	-0.125283	3.43763	1.13711	0.895041	0.0025672	0.26086	1	0.0466667	0.493257
PDACT_KE332554.1_G001630	Alcohol dehydrogenase 1	-0.163353	1.49577	1.1869	0.737341	0.00256949	0.0160272	1	0.0466736	0.082041
PDACT_KE332628.1_G002060	protein n=7 Tax=Poaceae RepID=Q69K64 ORYSJ	0.337931	1.17215	1.20362	0.382401	0.00259273	0.00202351	1	0.0470609	0.0195811
PDACT_KE332590.1_G001170	Phosphoglycerate mutase, 2,3-bisphosphoglycerate-independent LENGTH=557	-0.172286	-0.98657	-1.55325	0.595522	0.00260799	2.98178e-06	1	0.0472329	0.000140511
PDACT_KE332549.1_G005000	protein kinase family protein LENGTH=831	0.141143	1.15048	1.0741	0.710524	0.00260714	0.00497402	1	0.0472329	0.0368117
PDACT_KE333449.1_G000210	Plant protein of unknown function (DUF641) LENGTH=475	-0.302334	1.84259	1.34284	0.616185	0.00260621	0.0267191	1	0.0472329	0.116127
PDACT_KE333342.1_G000200	sugar transporter 4 LENGTH=514	-0.149708	-1.78268	-2.2246	0.794556	0.00261434	0.000220003	1	0.0472781	0.00381796
PDACT_KE332784.1_G001320	Charged multivesicular body protein 4b	0.805458	1.28694	0.915723	0.0587745	0.00261329	0.0320235	1	0.0472781	0.130545
PDACT_KE332625.1_G000260	Pentatricopeptide repeat-containing protein	0.0198909	1.25993	1.14307	0.961689	0.00261783	0.00622641	1	0.0473063	0.0429297
PDACT_KE332712.1_G000290	SERINE CARBOXYPEPTIDASE-LIKE 49 LENGTH=516	-0.297225	-1.01574	-1.0685	0.373215	0.00262152	0.00158626	1	0.047338	0.0163329
PDACT_KE332614.1_G000660	RING/U-box superfamily protein LENGTH=429	-1.84902	-2.98284	-3.94528	0.0516376	0.00263751	0.00013988	1	0.0473824	0.00269466
PDACT_KE332916.1_G000320	V-type ATP synthase subunit D	0.341021	0.909225	1.14955	0.25637	0.0026331	0.000153911	1	0.0473824	0.00290334
PDACT_KE333022.1_G000340	NADH dehydrogenase [ubiquinone] iron-sulfur protein 6, mitochondrial	0.243989	1.38607	1.48574	0.593671	0.00263232	0.0013206	1	0.0473824	0.0143249
PDACT_KE332636.1_G001170	Cytochrome P450 superfamily protein LENGTH=513	-0.16753	0.933413	0.997984	0.586749	0.00263364	0.00132207	1	0.0473824	0.0143345
PDACT_KE332709.1_G000870	CASP-like protein	-0.33809	2.04619	1.85226	0.606477	0.00263195	0.00614968	1	0.0473824	0.0425659
PDACT_KE332603.1_G000220	Alkaline ceramidase 3	0.0411978	1.24153	1.11513	0.921007	0.00263719	0.0069689	1	0.0473824	0.0465429
PDACT_KE332550.1_G000120	allene oxide synthase LENGTH=518	0.665628	2.23486	0.9442	0.350627	0.00263507	0.188553	1	0.0473824	0.405645
PDACT_KE332809.1_G000660	unknown protein; BEST Arabidopsis thaliana protein match is: unknown protein . LENGTH=747	-0.772629	-1.39332	-1.48116	0.0908396	0.00263957	0.00147027	1	0.0473847	0.0153767
PDACT_KE332800.1_G000790	Single-stranded DNA-binding protein WHY1, chloroplastic	0.182847	0.962717	0.897329	0.56746	0.00264511	0.00511495	1	0.0474493	0.0374923
PDACT_KE332569.1_G000140	Family of unknown function (DUF662) LENGTH=180	0.406951	2.15964	2.38701	0.555081	0.00264784	0.000997684	1	0.0474635	0.0115919
PDACT_KE332776.1_G001120	2-phosphoglycerate kinase	0.17862	-0.727955	-0.330503	0.45759	0.00265838	0.17064	1	0.0476177	0.382243
PDACT_KE332552.1_G005200	disease resistance family protein / LRR family protein LENGTH=905	-0.503874	-1.22062	-1.22762	0.209358	0.00266339	0.00253245	1	0.0476284	0.0230346
PDACT_KE332689.1_G000870	Eukaryotic initiation factor 4A (ATP-dependent RNA helicase eIF4A) n=2 Tax=Trebouxiophyceae RepID=E1ZM95 CHLVA	0.0842136	0.942576	0.79838	0.786752	0.00266387	0.0107692	1	0.0476284	0.0626514
PDACT_KE333014.1_G000200	Apoptosis-inducing factor 2	0.280822	0.946997	0.260188	0.370285	0.00266481	0.407056	1	0.0476284	0.635523
PDACT_KE332590.1_G002920	26S protease regulatory subunit 6B homolog	0.099746	-0.971674	-0.974959	0.755559	0.0026724	0.00260077	1	0.0477292	0.023473
PDACT_KE333860.1_G000250	hydroxycinnamoyl-CoA shikimate/quinate hydroxycinnamoyl transferase LENGTH=433	0.402796	2.17107	2.52559	0.563471	0.00268313	0.000578967	1	0.0478859	0.00784246
PDACT_KE332570.1_G004250	Apoptosis inhibitor 5	0.0573167	-0.746654	-1.02436	0.816502	0.00268902	4.3206e-05	1	0.0479291	0.00111596
PDACT_KE332896.1_G000410	Transmembrane protein 208	0.180027	-0.870468	-0.794635	0.531213	0.00268946	0.00612836	1	0.0479291	0.0424807
PDACT_KE332728.1_G000680	Histidine--tRNA ligase	-0.148443	-0.946277	-1.52441	0.634661	0.00269729	1.93402e-06	1	0.0479641	0.000101698
PDACT_KE332552.1_G007770	AFG1-like ATPase family protein LENGTH=655	-0.23505	-0.949676	-0.887173	0.453253	0.00269676	0.00506361	1	0.0479641	0.0372609
PDACT_KE333214.1_G000230	RNA-dependent RNA polymerase 1 LENGTH=1107	-0.299442	1.78823	1.51248	0.6057	0.00269519	0.0105555	1	0.0479641	0.0618785
PDACT_KE332606.1_G001270	Protein of unknown function (DUF607) LENGTH=336	0.581047	-2.06787	-3.63692	0.382147	0.00270201	1.14611e-06	1	0.0480131	6.81654e-05
PDACT_KE332548.1_G007940	Ras-related protein Rab-8A	-0.109328	-1.37013	-3.1178	0.806624	0.00271978	3.14621e-10	1	0.0482589	9.88394e-08
[truncated: 22,507 more rows]
