# Supplementary material for: Detecting early signs of heat and drought stress in Phoenix dactylifera (date palm)
Source: PLoS One. 2017 Jun 1;12(6):e0177883. doi: 10.1371/journal.pone.0177883 (PMC5453443; doi:10.1371/journal.pone.0177883)
Supplement: S6 Table — (XLSX) [file pone.0177883.s006.xlsx]

## Sheet: HSP
Supplementary Table 6. Differentially expressed heat shock protein genes in drought, heat, and combined heat and drought experiments. The genes with significantly higher or lower expression are highlighted with red and blue, respectively. Threshold for significance was abs(log2FC)>1 and FDR<0.05. CCA1, morning and evening elements are assigned to the gene (Yes: presence of the motif, and No: abse…
	Log2FC			p-values			Adjusted p-values (FDR)			cis Motifs
Gene ID	D	H	HD	PValue_D	PValue_H	PValue_HD	FDR_D	FDR_H	FDR_HD	cis evening element	cis morning element	cis CCA1	Definition	Description
PDACT_KE332549.1_G002790	1.9114	1.12579	1.55099	1.99945e-05	0.010287	0.000468129	9e-05	0.0213652	0.000972268	No	No	Yes	casein lytic proteinase B4	Encodes ClpB4, which belongs to the Casein lytic proteinase/heat shock protein 100 (Clp/Hsp100) family. Targeted to the mitochondrion, also referred to as ClpB-m. Transcripts of ClpB4 accumulate dramatically at high temperatures, suggesting that it may be involved in response to heat stress.
PDACT_KE332552.1_G006120	-0.260841	-2.2872	-1.8318	0.710326	0.00185909	0.0118726	0.799116	0.00592549	0.0173275	No	No	Yes	DNAJ heat shock family protein	NA
PDACT_KE332553.1_G001940	-0.217544	-1.04611	-0.51552	0.512008	0.00180552	0.121084	0.658296	0.00592549	0.145301	No	No	No	DNAJ heat shock N-terminal domain-containing protein	NA
PDACT_KE332554.1_G004440	1.02755	2.96868	3.50676	0.0228542	6.78862e-10	1.09482e-12	0.0457084	1.8333e-08	5.886e-11	Yes	No	Yes	heat shock cognate protein 70-1	encodes a member of heat shock protein 70 family.
PDACT_KE332554.1_G004580	-0.911001	-0.487272	-1.31671	0.0765391	0.338217	0.0115946	0.121562	0.397037	0.0173275	No	No	No	heat shock protein 70 (Hsp 70) family protein	encodes a heat shock protein whose gene expression is induced by heat and dehydration.
PDACT_KE332556.1_G000150	1.39683	0.360049	0.714047	0.00257971	0.429487	0.118524	0.00663353	0.493454	0.145301	No	No	No	HSP20-like chaperones superfamily protein	Encodes BOBBER1 (BOB1), a non-canonical small heat shock protein required for both development and thermotolerance. BOB1 is cytoplasmic at basal temperatures but forms heat shock granules containing canonical small heat shock proteins at high temperatures.
PDACT_KE332560.1_G000990	4.53662	1.58229	3.70272	4.1271e-06	0.0690885	9.22974e-05	2.78775e-05	0.0981784	0.00024921	No	No	Yes	HSP20-like chaperones superfamily protein	Columbia endomembrane-localized small heat shock protein
PDACT_KE332560.1_G001010	5.9478	4.11017	5.53451	5.2662e-07	0.000152461	1.93153e-06	5.6916e-06	0.00100848	1.1016e-05	No	No	Yes	HSP20-like chaperones superfamily protein	Columbia endomembrane-localized small heat shock protein
PDACT_KE332561.1_G001060	8.54153	1.96426	4.78911	6.8421e-08	0.0762795	0.000262723	3.6936e-06	0.105618	0.000591127	Yes	No	Yes	mitochondrion-localized small heat shock protein 23	AtHSP23-mito mRNA, nuclear gene encoding mitochondrial
PDACT_KE332562.1_G000660	0.736433	0.907462	1.24265	0.0712374	0.0265593	0.00255585	0.11657	0.0478068	0.00460052	Yes	No	Yes	heat shock protein 70 (Hsp 70) family protein	NA
PDACT_KE332562.1_G003770	6.08967	4.11055	5.90452	3.62807e-05	0.00169063	5.21413e-05	0.000150785	0.00592549	0.000175838	Yes	No	Yes	heat shock transcription factor A2	member of Heat Stress Transcription Factor (Hsf) family. Involved in response to misfolded protein accumulation in the cytosol. Regulated by alternative splicing and non-sense-mediated decay.
PDACT_KE332562.1_G003780	6.12516	3.93029	5.70488	1.37526e-07	0.00016808	5.53979e-07	3.726e-06	0.00100848	4.986e-06	Yes	No	Yes	heat shock transcription factor A2	member of Heat Stress Transcription Factor (Hsf) family. Involved in response to misfolded protein accumulation in the cytosol. Regulated by alternative splicing and non-sense-mediated decay.
PDACT_KE332565.1_G001020	0.766287	0.901021	1.49158	0.055433	0.0244104	0.000232281	0.0965608	0.0454539	0.000545355	No	No	No	DNAJ heat shock family protein	NA
PDACT_KE332565.1_G001060	0.920354	0.893919	1.19532	0.00740977	0.009211	0.000536527	0.0181876	0.0207247	0.00107305	No	No	Yes	DNAJ heat shock family protein	NA
PDACT_KE332571.1_G000760	0.185489	1.33019	1.71057	0.679531	0.00357304	0.000209203	0.780737	0.0087702	0.000513498	No	No	Yes	heat shock cognate protein 70-1	encodes a member of heat shock protein 70 family.
PDACT_KE332579.1_G001800	-0.0920409	-1.0412	-1.52179	0.865562	0.0582651	0.00631502	0.875517	0.0898947	0.00974317	No	No	No	Heat shock protein DnaJ with tetratricopeptide repeat	NA
PDACT_KE332593.1_G000820	0.936971	2.4367	1.91865	0.0485597	8.50274e-07	7.94945e-05	0.0874075	1.1475e-05	0.000232484	Yes	No	Yes	chaperonin 10	Encodes mitochondrial-localized chaperonin 10 that complements the E.coli groES mutant. Its mRNA is upregulated in response to heat shock treatment and is expressed uniformly in various organs.
PDACT_KE332601.1_G003230	0.164404	0.155203	-1.68452	0.875517	0.879949	0.0974267	0.875517	0.879949	0.123898	No	No	No	heat shock factor binding protein	Encodes a protein with similarity to heat shock factor binding proteins. Involved in negative regulation of heat shock response. Becomes nuclear localized upon heat treatment.
PDACT_KE332622.1_G001200	0.19439	1.87892	2.10256	0.502316	3.09407e-10	2.73674e-12	0.658296	1.6686e-08	7.398e-11	Yes	Yes	Yes	Heat shock protein DnaJ, N-terminal with domain of unknown function (DUF1977)	NA
PDACT_KE332624.1_G001220	0.0816659	0.544398	1.03284	0.809327	0.106831	0.0023573	0.856935	0.144222	0.00438945	No	No	Yes	heat shock transcription factor A4A	member of Heat Stress Transcription Factor (Hsf) family
PDACT_KE332631.1_G002080	4.95129	4.22596	5.07676	1.09044e-06	1.64899e-05	6.76199e-07	8.40857e-06	0.0001782	5.21486e-06	No	No	Yes	17 kDa class II heat shock protein	NA
PDACT_KE332640.1_G002750	-0.24235	-1.28156	-0.765319	0.599101	0.00618961	0.0986594	0.718921	0.0145321	0.123898	No	No	No	alpha-crystallin domain 32	ACD32 encodes an alpha-crystallin domain containing protein with homology to small heat shock proteins.
PDACT_KE332642.1_G000240	2.19622	1.51759	-0.656752	0.0443427	0.135826	0.341633	0.0825691	0.178404	0.361729	No	No	No	heat shock transcription factor B4	Encodes SCHIZORIZA, a member of Heat Shock Transcription Factor (Hsf) family. Functions as a nuclear factor regulating asymmetry of stem cell divisions.
PDACT_KE332643.1_G001140	8.6196	0.520864	4.64426	6.71617e-06	0.650233	0.00280803	3.57382e-05	0.666863	0.00473855	No	No	No	heat shock protein 70B	NA
PDACT_KE332671.1_G000700	1.20132	0.867959	1.58255	0.0103637	0.0622731	0.00082487	0.0239741	0.090885	0.00159082	No	No	No	Heat shock protein 70 (Hsp 70) family protein	Luminal binding protein (BiP2) involved in polar nuclei fusion during proliferation of endosperm nuclei.
PDACT_KE332677.1_G000930	4.77556	2.75556	4.4219	4.58447e-07	0.00140626	2.04089e-06	5.6916e-06	0.00584138	1.1016e-05	No	No	Yes	heat shock protein 90	Encodes a cytosolic heat shock protein AtHSP90. AtHSP90 interacts with disease resistance signaling components SGT1b and RAR1 and is required for RPS2-mediated resistance.
PDACT_KE332677.1_G002180	0.544998	1.45087	1.81407	0.23816	0.00188624	0.000119844	0.357241	0.00592549	0.00030817	Yes	No	Yes	DNAJ heat shock family protein	J domain protein localized in ER lumen. Can partially compensate for the growth defect in jem1 scj1 mutant yeast. Forms a complex SDF2-ERdj3B-BiP that is required for the proper accumulation of the surface-exposed leucine-rich repeat receptor kinases EFR. EFR is involved in PAMP (pathogen associated molecular patterns) triggered immunity.
PDACT_KE332677.1_G002200	0.122972	1.5069	2.46501	0.800137	0.00209829	1.02682e-06	0.856935	0.00596355	6.9525e-06	Yes	No	Yes	DNAJ heat shock family protein	J domain protein localized in ER lumen. Can partially compensate for the growth defect in jem1 scj1 mutant yeast. Forms a complex SDF2-ERdj3B-BiP that is required for the proper accumulation of the surface-exposed leucine-rich repeat receptor kinases EFR. EFR is involved in PAMP (pathogen associated molecular patterns) triggered immunity.
PDACT_KE332677.1_G002210	0.904181	1.34166	1.85023	0.0407411	0.002565	4.1032e-05	0.0785721	0.0065957	0.000158143	No	No	Yes	DNAJ heat shock family protein	J domain protein localized in ER lumen. Can partially compensate for the growth defect in jem1 scj1 mutant yeast. Forms a complex SDF2-ERdj3B-BiP that is required for the proper accumulation of the surface-exposed leucine-rich repeat receptor kinases EFR. EFR is involved in PAMP (pathogen associated molecular patterns) triggered immunity.
PDACT_KE332677.1_G002220	2.57611	1.33313	1.49511	0.187903	0.456741	0.411139	0.289908	0.513833	0.426952	No	No	No	DNAJ heat shock family protein	J domain protein localized in ER lumen. Can partially compensate for the growth defect in jem1 scj1 mutant yeast. Forms a complex SDF2-ERdj3B-BiP that is required for the proper accumulation of the surface-exposed leucine-rich repeat receptor kinases EFR. EFR is involved in PAMP (pathogen associated molecular patterns) triggered immunity.
PDACT_KE332678.1_G000950	0.377225	-0.41696	-1.32722	0.510391	0.467065	0.0228907	0.658296	0.514725	0.0316949	No	No	No	heat shock factor 4	Encodes a protein whose sequence is similar to heat shock factors that regulate the expression of heat shock proteins. Transcript level is increased in response to heat shock. However, overexpression of this gene did not result in the increase of decrease of heat shock proteins.
PDACT_KE332691.1_G000330	3.07073	2.77551	2.85116	6.36297e-06	3.59233e-05	2.34153e-05	3.57382e-05	0.000276943	0.0001053	No	No	Yes	DNAJ heat shock family protein	NA
PDACT_KE332707.1_G000110	-0.0582873	0.646221	2.00208	0.866518	0.0619583	1.86251e-08	0.875517	0.090885	2.673e-07	Yes	No	Yes	DNAJ heat shock family protein	NA
PDACT_KE332721.1_G001270	0.0956179	1.22039	1.43354	0.783538	0.000499571	4.74457e-05	0.856935	0.00269768	0.00017064	No	No	No	heat shock factor 3	Encodes a putative transcription factor whose expression is not induced by heat but whose stable overexpression leads to expression of HSP. Required early in the stress response for transient expression of heat shock genes.
PDACT_KE332743.1_G001280	1.34408	1.63099	1.85238	0.379869	0.301976	0.250528	0.539814	0.362372	0.27057	No	No	No	heat shock protein 90	Encodes a cytosolic heat shock protein AtHSP90. AtHSP90 interacts with disease resistance signaling components SGT1b and RAR1 and is required for RPS2-mediated resistance.
PDACT_KE332753.1_G000640	3.98468	5.69365	6.01945	4.21416e-05	6.97046e-08	1.98373e-08	0.00015156	1.2546e-06	2.673e-07	Yes	No	Yes	heat shock protein 90	Encodes a cytosolic heat shock protein AtHSP90. AtHSP90 interacts with disease resistance signaling components SGT1b and RAR1 and is required for RPS2-mediated resistance.
PDACT_KE332762.1_G001030	0.758193	1.27498	0.926552	0.0680161	0.00235665	0.0261012	0.114777	0.00636295	0.0352366	No	No	No	mitochondrial HSO70 2	heat shock protein 70 (Hsc70-5); nuclear
PDACT_KE332775.1_G001090	-0.376225	-0.767585	-1.65205	0.331455	0.0485318	3.17322e-05	0.483745	0.0818975	0.000131677	No	No	Yes	heat shock cognate protein 70-1	encodes a member of heat shock protein 70 family.
PDACT_KE332821.1_G001110	3.28495	3.04843	4.16269	7.27865e-06	2.59585e-05	4.80825e-08	3.57382e-05	0.000234	5.1948e-07	No	Yes	Yes	heat shock protein 101	Encodes ClpB1, which belongs to the Casein lytic proteinase/heat shock protein 100 (Clp/Hsp100) family. Involved in refolding of proteins which form aggregates under heat stress. Also known as AtHsp101. AtHsp101 is a cytosolic heat shock protein required for acclimation to high temperature.
PDACT_KE332894.1_G000240	0.314629	1.07543	0.559825	0.455789	0.0116032	0.185407	0.631092	0.0232065	0.204326	No	No	No	Chaperone protein htpG family protein	Encodes a chloroplast-targeted 90-kDa heat shock protein located in the stroma involved in red-light mediated deetiolation response and crucial for protein import into the chloroplast stroma. Mutants are resistant to chlorate, have elongated hypocotyls in light, and affect the expression of NR2, CAB, and RBCS but NOT NR1 and NiR.
PDACT_KE332944.1_G000530	-0.497041	-0.391887	-1.92651	0.526478	0.616397	0.0168645	0.661159	0.665709	0.0239654	No	No	No	DNAJ heat shock N-terminal domain-containing protein	NA
PDACT_KE332951.1_G000510	1.17745	1.29735	1.43343	0.0186909	0.00975823	0.00443489	0.0388195	0.0210778	0.00725709	No	No	Yes	Chaperone protein htpG family protein	encodes an ortholog of GRP94, an ER-resident HSP90-like protein and is involved in regulation of meristem size and organization. Single and double mutant analyses suggest that SHD may be required for the correct folding and/or complex formation of CLV proteins. Lines carrying recessive mutations in this locus exhibits expanded shoot meristems, disorganized root meristems, and defective pollen tub…
PDACT_KE332963.1_G000400	2.85098	1.00799	0.974995	7.97497e-05	0.138759	0.152063	0.000253165	0.178404	0.17471	No	No	No	17 kDa class II heat shock protein	NA
PDACT_KE332963.1_G000430	7.24877	-0.529164	0.497836	0.000102557	0.158997	0.584022	0.000307671	0.19967	0.595041	No	No	No	17 kDa class II heat shock protein	NA
PDACT_KE332964.1_G000370	4.53753	0.518208	0.471297	0.0106552	0.654513	0.677007	0.0239741	0.666863	0.677007	No	No	No	HSP20-like chaperones superfamily protein	Columbia endomembrane-localized small heat shock protein
PDACT_KE332973.1_G000140	4.32657	2.68858	4.75432	0.000250087	0.0137113	8.1805e-05	0.000710774	0.0264431	0.000232484	No	No	No	heat shock protein 17	member of the class I small heat-shock protein (sHSP) family, which accounts for the majority of sHSPs in maturing seeds
PDACT_KE333051.1_G000440	2.47886	1.86689	2.84462	5.84143e-05	0.00197516	5.49464e-06	0.0001971	0.00592549	2.69509e-05	No	No	No	heat shock protein 101	Encodes ClpB1, which belongs to the Casein lytic proteinase/heat shock protein 100 (Clp/Hsp100) family. Involved in refolding of proteins which form aggregates under heat stress. Also known as AtHsp101. AtHsp101 is a cytosolic heat shock protein required for acclimation to high temperature.
PDACT_KE333125.1_G000350	6.97511	2.69602	4.52492	4.03127e-05	0.0529498	0.00280389	0.00015156	0.0840967	0.00473855	No	No	Yes	heat shock protein 21	Encodes Hsp21, a chloroplast located small heat shock protein. A structure model of Hsp21, obtained by homology modeling, single-particle electron microscopy, and lysine-specific chemical crosslinking, shows that the Hsp21 subunits are arranged in two hexameric discs, rotated by 25 degree in relation to each other.
PDACT_KE333126.1_G000180	1.95707	0.286838	1.18933	0.00196868	0.639136	0.054875	0.00531544	0.666863	0.0722744	No	No	No	DNAJ heat shock family protein	NA
PDACT_KE333135.1_G000470	0.309862	1.31749	0.836036	0.623464	0.0376236	0.185322	0.731892	0.0655378	0.204326	No	No	No	heat shock cognate protein 70-1	encodes a member of heat shock protein 70 family.
PDACT_KE333337.1_G000320	-0.22749	0.529583	1.22864	0.598591	0.220299	0.00491157	0.718921	0.270367	0.00780073	No	No	No	heat shock transcription factor A2	member of Heat Stress Transcription Factor (Hsf) family. Involved in response to misfolded protein accumulation in the cytosol. Regulated by alternative splicing and non-sense-mediated decay.
PDACT_KE333362.1_G000270	6.03181	3.44646	3.82768	4.38903e-07	0.00104351	0.000353227	5.6916e-06	0.00469581	0.00076297	No	Yes	Yes	heat shock protein 91	encodes high molecular weight heat shock protein 70 not a HSP90 homolog, mRNA is constitutively expressed but transiently induced after heat shock
PDACT_KE333619.1_G000290	2.41716	1.88276	1.38716	0.0149411	0.0517675	0.14436	0.0322728	0.0840967	0.169466	No	No	No	heat shock transcription factor A1D	Member of Heat Stress Transcription Factor (Hsf) family. Negatively regulated by HSP90.
PDACT_KE333943.1_G000180	5.97621	3.64513	4.53979	8.46882e-07	0.000783824	6.13396e-05	7.623e-06	0.00384786	0.000194718	No	No	No	mitochondrion-localized small heat shock protein 23	AtHSP23-mito mRNA, nuclear gene encoding mitochondrial

## Sheet: HSF
Supplementary Table 6. Differentially expressed heat shock transcription factor genes in drought, heat, and combined heat and drought experiments. The genes with significantly higher or lower expression are highlighted with red and blue, respectively. Threshold for significance was abs(log2FC)>1 and FDR<0.05.
	Log2FC			p-values			Adjusted p-values (FDR)
	D	H	HD	PValue_D	PValue_H	PValue_HD	FDR_D	FDR_H	FDR_HD	Definition	Description
PDACT_KE332554.1_G002050	0.0279015	0.968628	0.960502	0.922431	0.000738075	0.000832362	0.945	0.00553556	0.00416	heat shock transcription factor A1D	Member of Heat Stress Transcription Factor (Hsf) family. Negatively regulated by HSP90.
PDACT_KE332562.1_G003770	6.08967	4.11055	5.90452	3.62807e-05	0.00169063	5.21413e-05	0.00027225	0.00845315	0.00039075	heat shock transcription factor A2	member of Heat Stress Transcription Factor (Hsf) family. Involved in response to misfolded protein accumulation in the cytosol. Regulated by alternative splicing and non-sense-mediated decay.
PDACT_KE332562.1_G003780	6.12516	3.93029	5.70488	1.37526e-07	0.00016808	5.53979e-07	2.07e-06	0.0025212	8.31e-06	heat shock transcription factor A2	member of Heat Stress Transcription Factor (Hsf) family. Involved in response to misfolded protein accumulation in the cytosol. Regulated by alternative splicing and non-sense-mediated decay.
PDACT_KE332624.1_G001220	0.0816659	0.544398	1.03284	0.809327	0.106831	0.0023573	0.945	0.200308	0.00885	heat shock transcription factor A4A	member of Heat Stress Transcription Factor (Hsf) family
PDACT_KE332642.1_G000240	2.19622	1.51759	-0.656752	0.0443427	0.135826	0.341633	0.11075	0.226377	0.481364	heat shock transcription factor B4	Encodes SCHIZORIZA, a member of Heat Shock Transcription Factor (Hsf) family. Functions as a nuclear factor regulating asymmetry of stem cell divisions.
PDACT_KE332685.1_G001000	-0.952113	-0.557598	-0.636886	0.0421695	0.229579	0.171618	0.11075	0.286974	0.286667	heat shock transcription factor A3	Member of Heat Stress Transcription Factor (Hsf) family. Expression is regulated by DREB2A and in turn HSFA3 regulates the expression of hsps Hsp18-CI and Hsp26-MII35S. Involved in establishing thermotolerence.
PDACT_KE332797.1_G001030	0.169305	-0.0451285	-0.0129908	0.562043	0.87714	0.964555	0.8985	0.87714	0.965	winged-helix DNA-binding transcription factor family protein	member of Heat Stress Transcription Factor (Hsf) family
PDACT_KE332910.1_G000630	0.0375665	-0.402583	-0.0775006	0.945191	0.462208	0.887332	0.945	0.495223	0.962143	heat shock transcription factor A3	Member of Heat Stress Transcription Factor (Hsf) family. Expression is regulated by DREB2A and in turn HSFA3 regulates the expression of hsps Hsp18-CI and Hsp26-MII35S. Involved in establishing thermotolerence.
PDACT_KE332931.1_G000200	0.660094	-1.18228	-1.47999	0.449882	0.171245	0.0901472	0.84375	0.256867	0.193071	winged-helix DNA-binding transcription factor family protein	member of Heat Stress Transcription Factor (Hsf) family
PDACT_KE333242.1_G000160	-0.0804494	0.529704	0.762844	0.778919	0.0638238	0.00777769	0.945	0.15956	0.01945	winged-helix DNA-binding transcription factor family protein	member of Heat Stress Transcription Factor (Hsf) family
PDACT_KE333329.1_G000110	-0.07579	-0.761759	-0.361501	0.845138	0.0511536	0.352568	0.945	0.155303	0.481364	heat shock transcription factor A3	Member of Heat Stress Transcription Factor (Hsf) family. Expression is regulated by DREB2A and in turn HSFA3 regulates the expression of hsps Hsp18-CI and Hsp26-MII35S. Involved in establishing thermotolerence.
PDACT_KE333329.1_G000120	0.352865	-0.691907	-0.0494706	0.362185	0.0753742	0.898328	0.775714	0.161516	0.962143	heat shock transcription factor A3	Member of Heat Stress Transcription Factor (Hsf) family. Expression is regulated by DREB2A and in turn HSFA3 regulates the expression of hsps Hsp18-CI and Hsp26-MII35S. Involved in establishing thermotolerence.
PDACT_KE333337.1_G000320	-0.22749	0.529583	1.22864	0.598592	0.220299	0.00491157	0.8985	0.286974	0.01473	heat shock transcription factor A2	member of Heat Stress Transcription Factor (Hsf) family. Involved in response to misfolded protein accumulation in the cytosol. Regulated by alternative splicing and non-sense-mediated decay.
PDACT_KE333614.1_G000120	0.62114	0.249046	-0.18523	0.0332863	0.3922	0.526019	0.11075	0.452539	0.6575	heat shock transcription factor A4A	member of Heat Stress Transcription Factor (Hsf) family
PDACT_KE333619.1_G000290	2.41716	1.88276	1.38716	0.0149411	0.0517675	0.14436	0.0745	0.155303	0.27	heat shock transcription factor A1D	Member of Heat Stress Transcription Factor (Hsf) family. Negatively regulated by HSP90.
